# Supplementary material for: Integration of small RNA, degradome, and transcriptome sequencing data illustrates the mechanism of low phosphorus adaptation in Camellia oleifera
Source: Frontiers journal article supplement (doi:10.3389/fpls.2022.932926), 2022-08-01
Supplement: Data_Sheet_1.ZIP [file Data_Sheet_1.ZIP]

## Sheet: Sheet1
Pre-miRNA Index	miRNA_Index	miR_name	miR_seq	len	genomeID	strand	start	end	pre-miRNA_seq	#mir/MIR	mirIDs,	rep_mirID	rep_mirSeq	rep_miRID	rep_miRSeq	type	Sequence in miRbase	group	SS	hairpinLen	CG%	dG	MFEI	LP_L_0d1(raw)	LP_L_0d2(raw)	LP_L_0d3(raw)	LP_L_30d1(raw)	LP_L_30d2(raw)	LP_L_30d3(raw)	LP_R_0d1(raw)	LP_R_0d2(raw)	LP_R_0d3(raw)	LP_R_1d1(raw)	LP_R_1d2(raw)	LP_R_1d3(raw)	LP_R_30d1(raw)	LP_R_30d2(raw)	LP_R_30d3(raw)	LP_R_3d1(raw)	LP_R_3d2(raw)	LP_R_3d3(raw)	LP_R_7d1(raw)	LP_R_7d2(raw)	LP_R_7d3(raw)	LP_S_0d1(raw)	LP_S_0d2(raw)	LP_S_0d3(raw)	LP_S_30d1(raw)	LP_S_30d2(raw)
1	1	vvi-MIR403d-p5_1ss12AG	TTTGTGCGCGAGTCCAACCCC	21	TRINITY_DN27707_c2_g1	+	103	260	cgagacgagacatatctctagTTTGTGCGCGAGTCCAATCCCatcatcccagccgtcctctcttcctttcccagagttcatatatcgaggcaaacccaaaaaccggccaatctgacggtgTTAGATTCACGCACAAACTCGtgatctgtcttctctgc	34	gma-MIR403a,gma-MIR403b,ptc-MIR403b,ptc-MIR403a,ptc-MIR403d,ptc-MIR403c,ath-MIR403,mdm-MIR403a,mdm-MIR403b,aly-MIR403a,aly-MIR403b,ppe-MIR403,mes-MIR403b,mes-MIR403a,vvi-MIR403f,vvi-MIR403e,vvi-MIR403d,vvi-MIR403a,vvi-MIR403b,vvi-MIR403c,csi-MIR403b,csi-MIR403a,bra-MIR403,bna-MIR403,cas-MIR403,rco-MIR403b,rco-MIR403a,htu-MIR403a,htu-MIR403d,htu-MIR403b,htu-MIR403c,htu-MIR403e,har-MIR403a,hpe-MIR4…	vvi-MIR403d	acaaacctcgagtttgtgcgcgaatccaacccctcaatcttctttcaaaggggtgTTAGATTCACGCACAAACTCGggatctgtct	vvi-MIR403d-p5	tttgtgcgcgaatccaacccc	5'	New	gp2a	.((((..(((((.(((...((((((((((.(((((.((..((.(((.....((((..((((...........))))............((.....))......)))).....))).))..)).))))).))))))))))...))).)))))))))...	158	50	-49.1	0.6	60	77	64	47	49	41	83	64	28	26	23	32	46	34	78	19	48	0	64	20	0	27	28	13	23	12
1	2	gma-miR403a_1ss20TC	TTAGATTCACGCACAAACTCG	21	TRINITY_DN27707_c2_g1	+	103	260	cgagacgagacatatctctagTTTGTGCGCGAGTCCAATCCCatcatcccagccgtcctctcttcctttcccagagttcatatatcgaggcaaacccaaaaaccggccaatctgacggtgTTAGATTCACGCACAAACTCGtgatctgtcttctctgc	34	gma-MIR403a,gma-MIR403b,ptc-MIR403b,ptc-MIR403a,ptc-MIR403d,ptc-MIR403c,ath-MIR403,mdm-MIR403a,mdm-MIR403b,aly-MIR403a,aly-MIR403b,ppe-MIR403,mes-MIR403b,mes-MIR403a,vvi-MIR403f,vvi-MIR403e,vvi-MIR403d,vvi-MIR403a,vvi-MIR403b,vvi-MIR403c,csi-MIR403b,csi-MIR403a,bra-MIR403,bna-MIR403,cas-MIR403,rco-MIR403b,rco-MIR403a,htu-MIR403a,htu-MIR403d,htu-MIR403b,htu-MIR403c,htu-MIR403e,har-MIR403a,hpe-MIR4…	gma-MIR403b	gagacagaggcaaatcgcaggttcgtgcgtgaatctaatcaaagtttctcattaacttctgcgTTAGATTCACGCACAAACTTGtcatttcccttttctt	gma-miR403a	TTAGATTCACGCACAAACTTG	3'	Diff	gp2a	.((((..(((((.(((...((((((((((.(((((.((..((.(((.....((((..((((...........))))............((.....))......)))).....))).))..)).))))).))))))))))...))).)))))))))...	158	50	-49.1	0.6	150	337.5	340	169	154.5	178	356.5	318	160	130	162	268.5	201	126.5	500	92	268	30	461	37	27	433	257	272	113	190
2	3	csi-MIR403b-p5_1ss13CT	TTGTGCGTGAATTTAACCCC	20	TRINITY_DN30191_c2_g3	+	98	253	gaggcatatttcagagTTGTGCGTGAATTTAACCCCactcctctcatccaaacagaaccttccccttcccttctgcctgaaatttttgtttttgtttttgtatttttggggttgatgacgTTAGATTCACGCACAAACTCTGtgatatgtcttttc	34	gma-MIR403b,gma-MIR403a,ptc-MIR403c,ptc-MIR403a,ptc-MIR403d,ptc-MIR403b,ath-MIR403,mdm-MIR403b,mdm-MIR403a,aly-MIR403a,aly-MIR403b,ppe-MIR403,mes-MIR403a,mes-MIR403b,vvi-MIR403c,vvi-MIR403b,vvi-MIR403a,vvi-MIR403d,vvi-MIR403e,vvi-MIR403f,csi-MIR403a,csi-MIR403b,bra-MIR403,bna-MIR403,cas-MIR403,rco-MIR403a,rco-MIR403b,htu-MIR403e,htu-MIR403c,htu-MIR403b,htu-MIR403d,htu-MIR403a,har-MIR403a,hpe-MIR4…	csi-MIR403b	ggggcacatctcaAGTTTGTGCGTGAATCTAACCccatcacagccgtccgttttcccgctctcatctgatggcgTTAGATTCACGCACAAACTCGcgatctgtcc	csi-MIR403b-p5	TTGTGCGTGAATCTAACCcc	5'	New	gp2a	(((((((((..((((((((((((((((((((((..........(((((....(((((.............)))))((..(((.....................)))..))...))))).))))))))))))))))).)))))..)))))))))...	156	40.4	-50.7	0.8	0	0	0	0	0	0	0	0	0	0	0	0	0	0	0	0	0	0	0	0	0	0	6	0	0	0
2	4	gma-miR403a_R+1_2ss20TC21GT	TTAGATTCACGCACAAACTCTG	22	TRINITY_DN30191_c2_g3	+	98	253	gaggcatatttcagagTTGTGCGTGAATTTAACCCCactcctctcatccaaacagaaccttccccttcccttctgcctgaaatttttgtttttgtttttgtatttttggggttgatgacgTTAGATTCACGCACAAACTCTGtgatatgtcttttc	34	gma-MIR403b,gma-MIR403a,ptc-MIR403c,ptc-MIR403a,ptc-MIR403d,ptc-MIR403b,ath-MIR403,mdm-MIR403b,mdm-MIR403a,aly-MIR403a,aly-MIR403b,ppe-MIR403,mes-MIR403a,mes-MIR403b,vvi-MIR403c,vvi-MIR403b,vvi-MIR403a,vvi-MIR403d,vvi-MIR403e,vvi-MIR403f,csi-MIR403a,csi-MIR403b,bra-MIR403,bna-MIR403,cas-MIR403,rco-MIR403a,rco-MIR403b,htu-MIR403e,htu-MIR403c,htu-MIR403b,htu-MIR403d,htu-MIR403a,har-MIR403a,hpe-MIR4…	gma-MIR403a	aaattgcaggttcgtgcgtgaatctaacgaaagtttctcgttctctccattccacttctgcgTTAGATTCACGCACAAACTTGtcattt	gma-miR403a	TTAGATTCACGCACAAACTTG	3'	Diff	gp2a	(((((((((..((((((((((((((((((((((..........(((((....(((((.............)))))((..(((.....................)))..))...))))).))))))))))))))))).)))))..)))))))))...	156	40.4	-50.7	0.8	14	54.5	42	21	16.5	38	117.5	86	111	29	33	54.5	45	103.5	55	10	53	7	89	10	9	156	95	81	7	19
3	5	ptc-MIR474a-p3_1ss7GC	TGCTGGCTTTGGCTGGGC	18	TRINITY_DN43106_c0_g2	-	65	162	agggcatggcatgcgggtggccacggctgggctgccttggccagtgcatggcatgcTGCTGGCTTTGGCTGGCCtgccttggccatggcatggcatgc	1	ptc-MIR474a,	ptc-MIR474a	tcCAAAAGTTGCTGGGTTTGGCTGGGcaggcggacccaatgctattgggttcagcaggacccaacacttctttccttctcttctatcaccagcaccctttgaaa	ptc-MIR474a-p3	TGCTGGGTTTGGCTGGGc	3'	New	gp2a	...(((((.(((((..(((((((.(((.((((((((..(((((((((((...)))).)))))))..))).)))))))).))))))).))))).)))))	98	67.3	-63.7	1	368	208	242	28	24	16	84	0	10	5	0	0	0	0	0	0	0	0	16	0	0	45	6	16	14	0
4	6	mes-MIR477g-p5_1ss1CT	TCCTCAAAGGCTTCCAATATT	21	TRINITY_DN42329_c2_g1	+	31	123	tcagagaagtttccaattgTCCTCAAAGGCTTCCAATATTcgattcaatgtggaatgttgggtcctttgaggtcaattgaagacttactcttc	11	mtr-MIR5204,gma-MIR862a,gma-MIR862b,gma-MIR5037c,mes-MIR477g,mes-MIR477f,vvi-MIR477a,csi-MIR477a,cme-MIR477a,cpa-MIR477,aqc-MIR477d,	mes-MIR477g	gacactgacattgctagaatggttagagaagcttccaATCTCCCTCAAAGGCTTCCAatattccaggccatggaaatgttggagacctttggaggggattgaaggcttactctcccatcatttaatgcaagcatagtttc	mes-MIR477g-p5	CCCTCAAAGGCTTCCAatatt	5'	New	gp2a	..((((((((((.((((((.(((((((((..((((((((((.((.....)).)))))))))).))))))))).)))))).)))))).))))..	93	39.8	-46.3	1.3	557	997	1196	147	166	184	4702	3084	2327	1668	1185	1942	1791	1410	3654	942	2866	522	7194	871	579	9805	5820	4907	1447	1925
5	7	stu-miR482a-5p_2ss3AG12AC	GGGATTGGTGGCTTGGAAAGC	21	TRINITY_DN26072_c0_g5	+	37	205	ttgggaagtgatgagaaacgggggatgaatatttgccgaaaatctttgGGGATTGGTGGCTTGGAAAGCttcgttcttttctcttttgaatgaatttaatggcTTTCCAAGTCCACCCATTCCTAttgttttcggtcttctctctcctttctcttctttcgcttcttca	6	stu-MIR482a,ppe-MIR482f,nta-MIR482a,nta-MIR482c,sly-MIR482a,cca-MIR6118,	stu-MIR482a	gagtttttcgaaaatctatgGGAATTGGTGGATTGGAAAGCttttattttcttctgattagcTTTCCAATTCCACCCATTCCTAtggtttttcggtatcctctc	stu-miR482a-5p	GGAATTGGTGGATTGGAAAGC	5'	Diff	gp2a	...((((((((.((((((.((((((.(((.....(((((((((...(((((((.((((((((((((((((((((((...........)))))).......))))))))))).))))).)))))))..))))))))).))))))))).)))))).....))))))))...	169	41.4	-73	1	77	118	175	105	102	153	205	291	347	72	96	126	127	312	183	32	156	22	284	28	19	306	241	145	79	130
5	8	stu-miR482a-3p_1ss8TG	TTTCCAAGTCCACCCATTCCTA	22	TRINITY_DN26072_c0_g5	+	37	205	ttgggaagtgatgagaaacgggggatgaatatttgccgaaaatctttgGGGATTGGTGGCTTGGAAAGCttcgttcttttctcttttgaatgaatttaatggcTTTCCAAGTCCACCCATTCCTAttgttttcggtcttctctctcctttctcttctttcgcttcttca	6	stu-MIR482a,ppe-MIR482f,nta-MIR482a,nta-MIR482c,sly-MIR482a,cca-MIR6118,	stu-MIR482a	gagtttttcgaaaatctatgGGAATTGGTGGATTGGAAAGCttttattttcttctgattagcTTTCCAATTCCACCCATTCCTAtggtttttcggtatcctctc	stu-miR482a-3p	TTTCCAATTCCACCCATTCCTA	3'	Diff	gp2a	...((((((((.((((((.((((((.(((.....(((((((((...(((((((.((((((((((((((((((((((...........)))))).......))))))))))).))))).)))))))..))))))))).))))))))).)))))).....))))))))...	169	41.4	-73	1	9307	20133	24112	11795	9890	13892	35219	29212	8207	19247	13104	25661	17809	12636	39628	7306	32821	4008	49568	5528	3796	87160	57898	43919	13772	21256
6	9	mdm-MIR482b-p3_2ss6TA22TA	TTTCCAATCCCTCCCATTCCTA	22	TRINITY_DN24046_c2_g2	+	1	139	ttgtgtgaaagagaaaagggaggttaggcttcacaaagctgtaggatggagaggttttgagaagaaaatacataattttcTTCCCAATCCCTCCCATTCCTAtgactttatgtgctttctccattttccctcatacttc	13	gma-MIR482a,gma-MIR482c,mdm-MIR482a,mdm-MIR482b,mdm-MIR482d,gra-MIR482,ppe-MIR482c,csi-MIR482a,csi-MIR482g,pgi-MIR482a,pgi-MIR482b,vun-MIR482,pvu-MIR482,	mdm-MIR482b	aggaagttgttggAATGGAAGGGTAGGAAAGAAGaaacttctcttgtatgttccaaattcaagagataaaattTCTTTCCTATCCCTCCCATTCCttckattttct	mdm-MIR482b-p3	TTTCCTATCCCTCCCATTCCtt	3'	New	gp2a	..((((((..(.(((((.(((((..((((..((.((((..(((((((((.((((..(((.(((((((((.....))))))))).)))..)))))))).)))))..)))).)).))))))))).))))).)))))))...	139	39.6	-55	1	675	1681	1906	1055	934	1242	1753	1450	520	893	743	1551	1008	566	2130	447	1580	175	2222	227	122	2821	2019	1631	533	906
1	1	mtr-MIR156f-p5_1ss21CT	TTGACAGAAGATAGAGAGCAT	21	TRINITY_DN40091_c1_g5	-	447	565	TTGACAGAAGATAGGGAGCATacataattaaagattaacaattctaggtaaagaaatccaaggaTTGACGGAAGAGAGAGAGCATgctgcgatattgcaaaggtactcttgatctgatc	174	mtr-MIR156f,mtr-MIR156f,mtr-MIR156h,mtr-MIR156h,mtr-MIR156e,mtr-MIR156e,gma-MIR156c,gma-MIR156c,gma-MIR156g,gma-MIR156g,gma-MIR156d,gma-MIR156d,gma-MIR156i,gma-MIR156i,gma-MIR156m,gma-MIR156m,gma-MIR156b,gma-MIR156b,gma-MIR156r,gma-MIR156r,gma-MIR156l,gma-MIR156l,gma-MIR156f,gma-MIR156f,gma-MIR156j,gma-MIR156j,ptc-MIR156i,ptc-MIR156i,ptc-MIR156j,ptc-MIR156j,ptc-MIR156g,ptc-MIR156g,ptc-MIR156h,ptc…	mtr-MIR156f	gtttgTTGACAGAAGATAGAGAGCACatctgaacaaacacaaaagacattgtgtttgaacagttgtgtgctctctgctcttctgccaacatact	mtr-MIR156f-p5	TTGACAGAAGATAGAGAGCAC	5'	New	gp2b	......................................(((((((.((.........)).))))))).((((...(((((..(....((((....))))...)..)))))..))))...	119	37.8	-19.7	0.4	0	0	0	0	0	0	0	0	0	0	0	0	0	0	0	0	0	0	0	0	0	5	0	0	0	0
1	2	mtr-miR156e_2ss12TG21CT	TTGACAGAAGAGAGAGAGCAT	21	TRINITY_DN40091_c1_g5	-	447	565	TTGACAGAAGATAGGGAGCATacataattaaagattaacaattctaggtaaagaaatccaaggaTTGACGGAAGAGAGAGAGCATgctgcgatattgcaaaggtactcttgatctgatc	174	mtr-MIR156f,mtr-MIR156f,mtr-MIR156h,mtr-MIR156h,mtr-MIR156e,mtr-MIR156e,gma-MIR156c,gma-MIR156c,gma-MIR156g,gma-MIR156g,gma-MIR156d,gma-MIR156d,gma-MIR156i,gma-MIR156i,gma-MIR156m,gma-MIR156m,gma-MIR156b,gma-MIR156b,gma-MIR156r,gma-MIR156r,gma-MIR156l,gma-MIR156l,gma-MIR156f,gma-MIR156f,gma-MIR156j,gma-MIR156j,ptc-MIR156i,ptc-MIR156i,ptc-MIR156j,ptc-MIR156j,ptc-MIR156g,ptc-MIR156g,ptc-MIR156h,ptc…	mtr-MIR156e	ggttgTTGACAGAAGATAGAGAGCACagatgatgatatgcatttatatatatatatatatatatatatatatatatatatatatatatatatatatatgaggagctggagctgcatggagatgaattttgtgcatatcactcctttgtgctctctatgcttctgtcatcacc	mtr-miR156e	TTGACAGAAGATAGAGAGCAC	3'	Diff	gp2b	......................................(((((((.((.........)).))))))).((((...(((((..(....((((....))))...)..)))))..))))...	119	37.8	-19.7	0.4	0	3	5	0	0	0	0	0	0	0	0	0	0	2.5	0	0	0	0	0	0	0	3.5	0	0	0	5
2	3	ptc-MIR156l-p3_2ss4TC17TA	GTTCTCTTTTCTTCTTAA	18	TRINITY_DN23997_c0_g4	+	180	208	cccaagaagaGTTCTCTTTTCTTCTTAAc	1	ptc-MIR156l,	ptc-MIR156l	gTTGACAGAAGATGGAGAGCACagctacatgtaatcgagaattagtcctgtagaagtgcagtttgtgctttgtgttttcttttcttctttaaac	ptc-MIR156l-p3	gttttcttttcttcttta	3'	New	gp2b	...((((((((.......))))))))...	29	37.9	-6.9	0.6	0	0	0	0	0	0	0	0	0	0	7	0	6	0	0	0	8	13	0	0	8	0	0	0	10	0
3	4	mtr-miR156a_L+1R-1	TTGACAGAAGAGAGAGAGCAC	21	TRINITY_DN32530_c0_g1	-	509	602	gaatcagTTGACAGAAGAGAGAGAGCACgatgcagattgggcactgcatccaagttggaagagagcatagattccttcggacctcgagtgaaaa	237	mtr-MIR156a,mtr-MIR156e,mtr-MIR156h,mtr-MIR156f,mtr-MIR156d,mtr-MIR156b,mtr-MIR156c,mtr-MIR156i,gma-MIR156f,gma-MIR156b,gma-MIR156d,gma-MIR156g,gma-MIR156c,gma-MIR156j,gma-MIR156l,gma-MIR156m,gma-MIR156i,gma-MIR156k,gma-MIR156e,gma-MIR156x,gma-MIR156n,gma-MIR156q,gma-MIR156v,gma-MIR156s,gma-MIR156h,gma-MIR156o,gma-MIR156a,gma-MIR156y,gma-MIR156w,gma-MIR156u,ptc-MIR156g,ptc-MIR156h,ptc-MIR156j,ptc…	mtr-MIR156a	agccatgaatcagtccgagaTGACAGAAGAGAGAGAGCACAcccacctgattacaagtaacaaaaaactaccaactatcaacattttgtctactatgaagaaaatcacatgtctagactatagttacgaatggaagatacattcaatgatgtttatgaaaatttgagacggtcgaggactatagttactctatcgcatacatttaatgacaaaaaaaattgtgtactcttatttattttcaatacatcttcattcaatttctatgcaagaatcaaaatgcagtataaaaaattgcattcaatatcatggtaaaaaaattgttcaaaaaaagtaaatatcatggtaaaaaaatcattagattttgcaataagtaagagtcaagttttaccttgtgaggaa…	mtr-miR156a	TGACAGAAGAGAGAGAGCACA	5'	Diff	gp2b	...(((.((((.................(((((((........)))))))...((..((((.(((......)))))))..)).)))).)))...	50	47.9	-21.3	0.5	817	1202.5	1444.5	111	89	78.5	1703	1120	410	393.5	159	214.5	628.5	815.5	826	422	591.5	143	1247.5	220.5	162.5	1643.5	1002.5	689	866.5	1007
4	4	mtr-miR156a_L+1R-1	TTGACAGAAGAGAGAGAGCAC	21	TRINITY_DN40091_c1_g7	-	935	984	caatctcagatgtctgcaatggcgacgATGACAGAAGAGAGAGAGCACaa	230	mtr-MIR156a,mtr-MIR156d,mtr-MIR156c,mtr-MIR156b,mtr-MIR156i,mtr-MIR156e,mtr-MIR156h,mtr-MIR156f,gma-MIR156f,gma-MIR156b,gma-MIR156x,gma-MIR156k,gma-MIR156n,gma-MIR156v,gma-MIR156a,gma-MIR156h,gma-MIR156o,gma-MIR156y,gma-MIR156w,gma-MIR156u,gma-MIR156e,gma-MIR156d,gma-MIR156g,gma-MIR156q,gma-MIR156c,gma-MIR156s,gma-MIR156j,gma-MIR156l,gma-MIR156m,gma-MIR156i,ptc-MIR156d,ptc-MIR156b,ptc-MIR156e,ptc…	mtr-MIR156a	agccatgaatcagtccgagaTGACAGAAGAGAGAGAGCACAcccacctgattacaagtaacaaaaaactaccaactatcaacattttgtctactatgaagaaaatcacatgtctagactatagttacgaatggaagatacattcaatgatgtttatgaaaatttgagacggtcgaggactatagttactctatcgcatacatttaatgacaaaaaaaattgtgtactcttatttattttcaatacatcttcattcaatttctatgcaagaatcaaaatgcagtataaaaaattgcattcaatatcatggtaaaaaaattgttcaaaaaaagtaaatatcatggtaaaaaaatcattagattttgcaataagtaagagtcaagttttaccttgtgaggaa…	mtr-miR156a	TGACAGAAGAGAGAGAGCACA	3'	Diff	gp2b	...((((.....((((((..(....)..)).)))).....))))......	50	48	-9.9	0.4	817	1202.5	1444.5	111	89	78.5	1703	1120	410	393.5	159	214.5	628.5	815.5	826	422	591.5	143	1247.5	220.5	162.5	1643.5	1002.5	689	866.5	1007
5	5	cme-MIR160c-p3_2ss13AG17AG	AGCCATGCATGTGTAAGT	18	TRINITY_DN26838_c0_g4	+	1	41	gcatatgttcctcttaaggattaAGCCATGCATGTGTAAGT	1	cme-MIR160c,	cme-MIR160c	tcatcgtaaTGCCTGGCTCCCTGTATGCCAtttgcaaagcccatcatctaaaaataggtggccttctcgaatggcatgcaaggagccatgcatgtataaatt	cme-MIR160c-p3	agccatgcatgtataaat	3'	New	gp2b	((((((((....(((((...)))))....))))))))....	41	39	-9.6	0.6	0	0	0	39	29	32	33	22	297	44	41	75	73	22	12	58	27	29	50	39	93	6	8	0	56	52
6	6	lus-MIR160d-p5_1ss1GA	AGTGGGTGGTGGTGGTGG	18	TRINITY_DN35193_c0_g1	-	111	194	acggaggaggAGTGGGTGGTGGTGGTGGtgggattggggagtctggttctgatcttgaactttcagcgaaagcttcatctttct	1	lus-MIR160d,	lus-MIR160d	gctagctaaggtggcggtggtgggtggtggtggtggtgttgagttgagtgtgtaatggctgtgtgtgcgTGCCTGGCTCCCTGTATGCCAtttgcaagagctcatcaacacagttttgatggggcttggtggatggcgtactgagtagccatgcatgcttataactaccattaactcctccattcatttatccccaaccaaccattcccttccttcctactggcaccaatgctgc	lus-MIR160d-p5	ggtgggtggtggtggtgg	5'	New	gp2b	..(((((((((((...((.((..(((..(..(((..((.........))..)))..).)))..)).))...))))).)))))).	71	52.4	-26.9	0.6	4	0	0	0	0	0	7.5	0	0	0	0	0	0	0	0	0	0	0	0	0	0	0	0	0	0	0
7	6	lus-MIR160d-p5_1ss1GA	AGTGGGTGGTGGTGGTGG	18	TRINITY_DN36444_c0_g5	-	121	191	AGTGGGTGGTGGTGGTGGgtctctctctctctctctctctagtctagtgtcgagtcgagagagcaccagaa	1	lus-MIR160d,	lus-MIR160d	gctagctaaggtggcggtggtgggtggtggtggtggtgttgagttgagtgtgtaatggctgtgtgtgcgTGCCTGGCTCCCTGTATGCCAtttgcaagagctcatcaacacagttttgatggggcttggtggatggcgtactgagtagccatgcatgcttataactaccattaactcctccattcatttatccccaaccaaccattcccttccttcctactggcaccaatgctgc	lus-MIR160d-p5	ggtgggtggtggtggtgg	5'	New	gp2b	......(((((.....(((.....))).(((((((.(((............)))..))))))))))))...	71	54.9	-18.4	0.5	4	0	0	0	0	0	7.5	0	0	0	0	0	0	0	0	0	0	0	0	0	0	0	0	0	0	0
8	7	lus-MIR160b-p5_2ss12CT17CG	AGCCATGCATGTCTAAGTA	19	TRINITY_DN36903_c0_g2	+	34	167	AGCCATGCATGTCTAAGTAtaaacaactttgtactgtgaaactgcgaatggctcattatatcagttatagtctactcgatagtaccttactacttggatacccgtagtaattctagagctaatacatgcataaa	2	lus-MIR160b,cme-MIR160c,	lus-MIR160b	ggtggtgagttagtgtgtaatgtgtgtgcgTGCCTGGCTCCCTGTATGCCAtttgcaagagctcatcaacacagttttgatggggcttggtggatggcgtactgagtagccatgcatgcctaactatcattgctccaaatctaacttctccatt	lus-MIR160b-p5	agccatgcatgcctaacta	5'	New	gp2b	....((((((((...((((((((....)))))))).............((((((....(((((((........))).)))).....(((((((..((....))))))))).....))))))..))))))))...	134	35.8	-32.8	0.7	0	0	0	0	0	0	3.5	7.5	0	0	4	5.5	4.5	0	0	0	13	0	0	0	6.5	9.5	4.5	10	13	4.5
9	8	mtr-miR160a	TGCCTGGCTCCCTGTATGCCA	21	TRINITY_DN37578_c1_g1	-	119	203	caTGCCTGGCTCCCTGTATGCCTgcaggaatgttgtcggatacacaacacaaggggctgctgggcctgagggggttgctgggaaa	75	mtr-MIR160a,mtr-MIR160d,mtr-MIR160b,mtr-MIR160e,gma-MIR160e,gma-MIR160d,gma-MIR160c,gma-MIR160b,gma-MIR160a,gma-MIR160f,ptc-MIR160c,ptc-MIR160d,ptc-MIR160a,ptc-MIR160b,ath-MIR160c,ath-MIR160a,ath-MIR160b,mdm-MIR160b,mdm-MIR160d,mdm-MIR160e,mdm-MIR160c,mdm-MIR160a,stu-MIR160a,stu-MIR160b,aly-MIR160c,aly-MIR160a,aly-MIR160b,ppe-MIR160b,ppe-MIR160a,mes-MIR160g,mes-MIR160c,mes-MIR160h,mes-MIR160d,mes…	mtr-MIR160b	gtatgTGCCTGGCTCCCTGTATGCCAtatatgaagctcattgaaaaatcaatgacctttgtggatggcgtatgaggagccaagcatattcc	mtr-miR160a	TGCCTGGCTCCCTGTATGCCA	5'	Yes	gp2b	....((..((.((((.((.((((((((...((((((.......)))))).......)))).)))).))..))))..))..))...	127	58.8	-29.8	0.6	4229.5	6208.5	7272	2037	2214.5	2282.5	5085.5	5454.5	543.5	2453.5	2995.5	4381.5	4335.5	1809.5	6002.5	2269	4924.5	960	7868.5	2094	1288.5	12120	8337.5	6214	4527	4585
10	8	mtr-miR160a	TGCCTGGCTCCCTGTATGCCA	21	TRINITY_DN37578_c1_g3	-	1235	1361	aaTGCCTGGCTCCCTGTATGCCTgcaggaatgttgtcggatagacaacacaaaggactgctgggccctagggggttgcgtgaaaatgacggcattgaaaattggccgtcgagagggaagtcggggtg	80	mtr-MIR160a,mtr-MIR160d,mtr-MIR160b,mtr-MIR160e,gma-MIR160b,gma-MIR160c,gma-MIR160a,gma-MIR160f,gma-MIR160e,gma-MIR160d,ptc-MIR160a,ptc-MIR160b,ptc-MIR160c,ptc-MIR160d,ptc-MIR160g,ath-MIR160a,ath-MIR160b,ath-MIR160c,mdm-MIR160a,mdm-MIR160b,mdm-MIR160d,mdm-MIR160e,mdm-MIR160c,stu-MIR160a,stu-MIR160b,aly-MIR160b,aly-MIR160c,aly-MIR160a,ppe-MIR160a,ppe-MIR160b,mes-MIR160d,mes-MIR160a,mes-MIR160b,mes…	mtr-MIR160b	gtatgTGCCTGGCTCCCTGTATGCCAtatatgaagctcattgaaaaatcaatgacctttgtggatggcgtatgaggagccaagcatattcc	mtr-miR160a	TGCCTGGCTCCCTGTATGCCA	5'	Yes	gp2b	....(((((((((((.(((((..((((...(((((((.....))))))).......))))...((((....)))).)))))....(((((((...........)))))))..))))).))))))...	127	55.1	-50.1	0.7	4229.5	6208.5	7272	2037	2214.5	2282.5	5085.5	5454.5	543.5	2453.5	2995.5	4381.5	4335.5	1809.5	6002.5	2269	4924.5	960	7868.5	2094	1288.5	12120	8337.5	6214	4527	4585
11	9	ptc-miR160h_1ss15CG	TGCCTGGCTCCCTGGATGCCA	21	TRINITY_DN39928_c3_g4	-	975	1074	caTGCCTGGCTCCCTGCATGCCAgcaggagcattgtcgggaagacaactgaagggacgtaacgggttgccggaaaatgttggcatcgcaagttggccgtc	11	mtr-MIR160f,ptc-MIR160h,ptc-MIR160g,vvi-MIR160d,nta-MIR160d,lus-MIR160g,lus-MIR160c,bna-MIR160b,bna-MIR160d,cca-MIR160a,aqc-MIR160a,	ptc-MIR160h	gatccctgtgTGCCTGGCTCCCTGCATGCCAtttgcatagctcatcagaacgtcggtggccttggtggatggcgtgcaacgagtcatgcatgctgtga	ptc-miR160h	TGCCTGGCTCCCTGCATGCCA	5'	Diff	gp2b	......(((((..(((((((((((((....(((((((.....))))).))...........(((....))).....))))))))).))).)..)))))..	100	58	-32.9	0.6	0	0	8	0	0	0	5	11	0	0	6	8	29.5	13	41.5	5	7	0	14	0	0	6	3.5	3.5	0	0
12	10	cme-MIR164a-p5_2ss10TA21TG	AAAAATCCCATCTTTTCTTTGT	22	TRINITY_DN46422_c1_g4	-	313	418	ctttgggaaatAAAAATTCCATCTTTTCTTTGTgccacttcaatgccgagaaaatgagccatcaatccaatatctgtcatttcaaATTCTTGGACCATGCTTCTTT	3	csi-MIR166k,csi-MIR166i,cme-MIR164a,	cme-MIR164a	atgaagagcaagaTGGAGAAGCAGGGCACGTGCTttactaactcagttccaattcaaaaatcccttcttttctttttctttctctttttct	cme-MIR164a-p5	aaaaatcccttcttttcttttt	5'	New	gp2b	...(((((........)))))..((((((..((...........))..)))))).((((......(((((.((.((......)).))..)))))....))))....	106	35.8	-12.3	0.3	0	0	0	0	0	0	0	5	0	8	6	8	5	0	8	0	10	0	22	0	0	20	8	8	0	0
12	11	csi-MIR166k-p3_2ss13GT19AT	ATTCTTGGACCATGCTTCTTT	21	TRINITY_DN46422_c1_g4	-	313	418	ctttgggaaatAAAAATTCCATCTTTTCTTTGTgccacttcaatgccgagaaaatgagccatcaatccaatatctgtcatttcaaATTCTTGGACCATGCTTCTTT	3	csi-MIR166k,csi-MIR166i,cme-MIR164a,	csi-MIR166k	gagagggttaggtttgagaggaatgttgtctggttcaagatcatggaggaagaataaatatctgaaccctaaatgatTCTTGGACCAGGCTTCATTCCactcaaccaactcctct	csi-MIR166k-p3	atTCTTGGACCAGGCTTCATT	3'	New	gp2b	...(((((........)))))..((((((..((...........))..)))))).((((......(((((.((.((......)).))..)))))....))))....	106	35.8	-12.3	0.3	0	0	5	0	0	0	0	5	0	0	0	0	7	0	0	0	0	0	0	0	0	0	0	0	0	0
13	12	mtr-MIR164c-p3_2ss9AG20TC	TCTCTCTCGAACTTCAATCCC	21	TRINITY_DN26062_c0_g1	+	54	88	gcccgagtcggttaTCTCTCTCGAACTTCAATCCC	1	mtr-MIR164c,	mtr-MIR164c	cttgtTGGAGAAGCAGGGCACGTGCAaccgtagatctctctcaaacttcaatctcattttgcacgtgctccacttttccaacttga	mtr-MIR164c-p3	tctctctcaaacttcaatctc	3'	New	gp2b	...((((..((....))..))))............	35	54.3	-5.3	0.3	0	0	0	0	0	0	0	0	0	0	5	0	12	9	14	0	6	0	13	0	0	0	0	0	0	0
14	13	mtr-miR164a_R-2	TGGAGAAGCAGGGCACGTG	19	TRINITY_DN36737_c1_g3	-	395	432	TGGAGAAGCAGGACACGTGaacagattcggacgtggcg	76	mtr-MIR164b,mtr-MIR164a,mtr-MIR164c,gma-MIR164d,gma-MIR164g,gma-MIR164i,gma-MIR164c,gma-MIR164b,gma-MIR164a,gma-MIR164h,gma-MIR164k,gma-MIR164e,gma-MIR164f,gma-MIR164j,ptc-MIR164a,ptc-MIR164d,ptc-MIR164b,ptc-MIR164c,ptc-MIR164e,ath-MIR164a,ath-MIR164b,ath-MIR164c,mdm-MIR164f,mdm-MIR164e,mdm-MIR164c,mdm-MIR164d,mdm-MIR164b,aly-MIR164b,aly-MIR164a,aly-MIR164c,ppe-MIR164c,ppe-MIR164a,ppe-MIR164b,mes…	mtr-MIR164c	cttgtTGGAGAAGCAGGGCACGTGCAaccgtagatctctctcaaacttcaatctcattttgcacgtgctccacttttccaacttga	mtr-miR164a	TGGAGAAGCAGGGCACGTGCA	5'	Diff	gp2b	.............((((((((....)))..)))))...	38	57.9	-5	0.2	6.5	5	0	4	0	0	10.5	0	14.5	3	5	11	12.5	16.5	8	3.5	0	0	17	0	10.5	2.5	7.5	3	0	0
15	14	mtr-miR164a_R-1	TGGAGAAGCAGGGCACGTGC	20	TRINITY_DN46257_c1_g2	-	261	389	tggttgacatgtttgggtccatgtgggtgaggtgagaaaaagtaggggtggtttggtttggggtgaaaaTGGAGAAGCAGGGCACTTGCtcatagtcatgatactcatttgtattggtttggtcaaagg	76	mtr-MIR164a,mtr-MIR164c,mtr-MIR164b,gma-MIR164j,gma-MIR164f,gma-MIR164e,gma-MIR164k,gma-MIR164h,gma-MIR164a,gma-MIR164c,gma-MIR164b,gma-MIR164i,gma-MIR164d,gma-MIR164g,ptc-MIR164e,ptc-MIR164c,ptc-MIR164b,ptc-MIR164d,ptc-MIR164a,ath-MIR164c,ath-MIR164b,ath-MIR164a,mdm-MIR164b,mdm-MIR164d,mdm-MIR164c,mdm-MIR164e,mdm-MIR164f,aly-MIR164c,aly-MIR164a,aly-MIR164b,ppe-MIR164b,ppe-MIR164a,ppe-MIR164c,mes…	mtr-MIR164b	caagaTGGAGAAGCAGGGCACGTGCAatactaactcatgaacatacacacatgatggaagtgaatacaaagagaatctacattctcttatgtttcatttttttaattgagttagttcttcatgtgcccctcttccccatcatga	mtr-miR164a	TGGAGAAGCAGGGCACGTGCA	3'	Diff	gp2b	...(((((....(..(...((..((((((..((((.....((((..((((..(((.(((...((....))...))).)))..)))))))).....))))..))))))..))..)..)....)))))...	129	45.7	-26.7	0.5	57.5	106	65	40	44	55	114.5	66	36.5	41	17	66	50.5	112.5	48	25.5	40	30	68	31	48.5	92.5	38.5	35	30	19
16	15	nta-MIR166c-p5_2ss6CG17AG	CGAAAGCATTCACCAAGG	18	TRINITY_DN31900_c0_g4	+	352	459	CGAAAGCATTTACCAAGGatgttttcattaatcaagaacgaaagttaggggatcgaagatgattagataccatcgtagtcttaACCATAAACTATGCCGACtcgggat	3	gma-MIR1520d,nta-MIR166c,peu-MIR2916,	nta-MIR166c	tctgttgaggggaatgctgtctggttcgaaaccattcaccaaagtatgatcaagagtttgattatttgaatgattTCGGACCAGGCTTCATTCCCCccaactcta	nta-MIR166c-p5	cgaaaccattcaccaaag	5'	New	gp2b	.(((((((((.......)))))))))..........(((....)))..((....((..(((((........)))))..))....)).......((.(((...))).))	108	38.9	-19.8	0.5	0	0	0	0	0	0	0	0	0	0	3	0	0	0	0	0	0	0	0	0	6	0	0	0	0	0
16	16	peu-MIR2916-p3_2	ACCATAAACGATGCCGAC	18	TRINITY_DN31900_c0_g4	+	352	459	CGAAAGCATTTACCAAGGatgttttcattaatcaagaacgaaagttaggggatcgaagatgattagataccatcgtagtcttaACCATAAACTATGCCGACtcgggat	3	gma-MIR1520d,nta-MIR166c,peu-MIR2916,	peu-MIR2916	TGGGGACTCGAAGACGATCATATaccatcctagtctcaaccataaacgatgccgaccagggattggcggatgttgcttctaggagtccgcca	peu-MIR2916-p3	accataaacgatgccgac	3'	New	gp2b	.(((((((((.......)))))))))..........(((....)))..((....((..(((((........)))))..))....)).......((.(((...))).))	108	38.9	-19.8	0.5	0	7	3.5	8.5	3	4.5	8.5	9.5	8.5	49.5	58	25.5	72.5	0	10	58	28	40.5	42	55.5	146.5	3	3	0	7.5	11
17	17	mtr-miR166c_R-2	TCGGACCAGGCTTCATTCC	19	TRINITY_DN34794_c0_g2	-	1229	1265	atCCGGACCAGGCTTCATTCCaggcatttggacccac	175	mtr-MIR166f,mtr-MIR166e,mtr-MIR166a,mtr-MIR166c,mtr-MIR166g,mtr-MIR166b,gma-MIR166c,gma-MIR166m,gma-MIR166f,gma-MIR166b,gma-MIR166g,gma-MIR166r,gma-MIR166k,gma-MIR166i,gma-MIR166d,gma-MIR166e,gma-MIR166t,gma-MIR166s,gma-MIR166p,gma-MIR166n,gma-MIR166u,gma-MIR166j,gma-MIR166h,gma-MIR166a,gma-MIR166o,gma-MIR166q,ptc-MIR166a,ptc-MIR166d,ptc-MIR166q,ptc-MIR166i,ptc-MIR166g,ptc-MIR166c,ptc-MIR166h,ptc…	mtr-MIR166c	gctgagaggaacgcagtctggctcgaggaatgctcagatctgttttgatctgatcgatatgttcatatctaattaattcTCGGACCAGGCTTCATTCCTCccatc	mtr-miR166c	TCGGACCAGGCTTCATTCCTC	5'	Diff	gp2b	....((.((((((((......))))..)))).))...	37	56.8	-7.1	0.3	698	622	773	435	347	411	519	469	718	434	221	334	294	739	421	275	448	191	542	349	362	310	211	131	253	221
18	18	vvi-MIR167a-p5_2ss17AC18GA	CAAAACCTAACTCCATCA	18	TRINITY_DN38378_c0_g1	-	261	302	CAAAACCTAACTCCATCAtgggtaatccggagtgtcggtgac	1	vvi-MIR167a,	vvi-MIR167a	tttgagaggtTGAAGCTGCCAGCATGATCTGgtgaaacaaacaccatctctttcttctctaaccccatgtctggattcgtccaccgatccattattatagaccaggccgcccgtttcccatgtagtgatcgataattaggctcggggttttcactttttagtgggatctaatccttaggatggatgtttgtatgggtggtatatatcatggtgaggtctgttttctattttaattctaacggggttttgatttagctgagggggtataattcatagcctaattccaaaacctaactccatagagatagggttccatgatcaggtcatcttgcagcttcaatcactcactca	vvi-MIR167a-p5	caaaacctaactccatag	5'	New	gp2b	....(((..(((((.....(((...))))))))...)))...	78	50	-11	0.5	3	0	3	0	0	0	0	0	0	0	0	0	0	0	0	0	0	0	0	0	0	0	0	0	0	0
19	18	vvi-MIR167a-p5_2ss17AC18GA	CAAAACCTAACTCCATCA	18	TRINITY_DN39917_c0_g1	+	23	100	CAAAACCTAACTCCATCAtggataatccggagtgtcggtgacttgggaattgagacccgttccgtcactcggagtacg	1	vvi-MIR167a,	vvi-MIR167a	tttgagaggtTGAAGCTGCCAGCATGATCTGgtgaaacaaacaccatctctttcttctctaaccccatgtctggattcgtccaccgatccattattatagaccaggccgcccgtttcccatgtagtgatcgataattaggctcggggttttcactttttagtgggatctaatccttaggatggatgtttgtatgggtggtatatatcatggtgaggtctgttttctattttaattctaacggggttttgatttagctgagggggtataattcatagcctaattccaaaacctaactccatagagatagggttccatgatcaggtcatcttgcagcttcaatcactcactca	vvi-MIR167a-p5	caaaacctaactccatag	5'	New	gp2b	.........(((((.....((.....)).(((((.(((.(((..(((........))))))))).))))))))))...	78	51.3	-24.8	0.6	3	0	3	0	0	0	0	0	0	0	0	0	0	0	0	0	0	0	0	0	0	0	0	0	0	0
20	19	gra-miR167a_L-2R+2	AGATCATCTTGCAGCTTCAAT	21	TRINITY_DN42998_c2_g3	+	85	172	catcAGGTCATCTTGCAGCTTCAATcactcactcaccaacaatatatataacaagaatattcattgaatctctgcaattcgcctgttt	8	gma-MIR167c,gra-MIR167a,gra-MIR167b,vvi-MIR167a,csi-MIR167c,lus-MIR167b,cca-MIR167,dpr-MIR167c,	gra-MIR167b	tttgagaggttgaagctgccagcatgatctggtaatgggcctagctatcaccctttttttatttttgtattcttaggcctcttttatagtttttgtacaggtatgttaagttagattgtttatgaccggttttagatcaaaattcttttgagtccaagatgagtttttttctttctttctttcaggagaagtttatcaatcatttggttaagggcttttagagtcttagattaccaggcaacttagatgtgtttataaagaaccctgcctgtacttaagcttcataggttgtcggttcatactaTCAGATCATCTTGCAGCTTCAatcactcact	gra-miR167a	TCAGATCATCTTGCAGCTTCA	5'	Diff	gp2b	...(((((....((((((.((((((.....................................))))))...))))))...)))))...	88	36.4	-13.374	0.4	1589	2356	2874	902	837	875	121	177	80	96	92	196	220	157	349	88	193	25	300	58	19	33	16	15	11	24
21	20	mtr-miR168b_L-2	GCTTGGTGCAGGTCGGGAA	19	TRINITY_DN45146_c0_g6	-	297	397	ttGCTTGGTGCAGCTCGGGAActggtggtctagaaggcccaccagcagaaggtacaaccccaaggccaccacccacaccactactgctgctgccaccacgc	29	mtr-MIR168c,mtr-MIR168b,mtr-MIR168a,gma-MIR168b,gma-MIR168a,ptc-MIR168a,ptc-MIR168b,ath-MIR168b,ath-MIR168a,mdm-MIR168b,mdm-MIR168a,lja-MIR168,aly-MIR168b,aly-MIR168a,ppe-MIR168,mes-MIR168a,vvi-MIR168,nta-MIR168e,nta-MIR168d,csi-MIR168,lus-MIR168a,lus-MIR168b,cme-MIR168,bra-MIR168a,bna-MIR168a,rco-MIR168,cca-MIR168a,vun-MIR168,crt-MIR168,	mtr-MIR168b	aacctctgatTCGCTTGGTGCAGGTCGGGAAccattacatccacagtttccctcggtaaattggatcctgccttgcatcaatcgaatcggaggctgca	mtr-miR168b	TCGCTTGGTGCAGGTCGGGAA	5'	Diff	gp2b	..((.(((((((((..(((...(((((((((....((...(((.......)))....))...))))))))))))....((....))..))))).)))).))	101	61.4	-34.5	0.6	69	68	86	49	65	56	37	21	0	40	25	29	46	0	67	21	41	17	64	24	19	21	18	8	24	26
22	21	nta-MIR169t-p5_2ss16TG21GA	TTTTGATGGTTGGAAGGCGTA	21	TRINITY_DN25030_c0_g6	+	106	150	aTTTCGATGGTTGGAAGGCGTAcgatagcgatccatatcatccta	1	nta-MIR169t,	nta-MIR169t	ctttgtttagTAGCCAAGGATGACTTGCCTTtcatcaatgcatacaaaatgggagcaaaaaccccttttgatggttggaatgcgtggcaagcatctttggcgacttgacgagctc	nta-MIR169t-p5	ttttgatggttggaatgcgtg	5'	New	gp2b	.....((((((((((..((........))..)))).))))))...	45	44.4	-12.7	0.6	0	0	5	0	0	0	0	0	6	0	0	0	0	0	0	0	0	0	0	0	0	6	7	0	0	0
23	22	lus-MIR169b-p5_2ss7GT17AT	ATATACTGGAGGAAGGTGGG	20	TRINITY_DN27866_c0_g1	+	160	216	ATAAACTGGAGGAAGGTGGGgatgacgtcaagtcctcatggcctttatgtccagggc	2	lus-MIR169b,cme-MIR171i,	lus-MIR169b	ggtttgtcaggcagtcttcttggctatgctgacagactcttttcattcatgttaagctttcttttcctcgaaatcacgatttataaaaagcacatatatatacgggaggaaggagggtcttacatgaagaaaagagtgtattgtttgcTAGCCAAGGATGACTTGCCTGcagct	lus-MIR169b-p5	atatacgggaggaaggaggg	5'	New	gp2b	.....(((((.((((((((((((........))))))...))))))...)))))...	57	52.6	-19.7	0.7	0	0	0	0	0	0	3	2.5	4.5	3	2.5	11	7.5	0	0	3.5	5.5	0	0	0	0	0	0	0	0	7.5
24	23	ppe-MIR169i-p5_2ss16GT19TA	TTCTCTTCTTTCTTTTTTA	19	TRINITY_DN28501_c1_g2	+	1150	1278	cgTTCTCTTCTTTCTTTTTGAtttttacttggttggcagggtcagggcctttctcgctgggcgagcgcatccgattctaaagtcctttcctaaaccacttcccgttcagttgctgaaagatagagataa	1	ppe-MIR169i,	ppe-MIR169i	gcaaacttaaggaaatgaagagagggtctaacatgaagataagagtcttgtttggTAGCCAAGGATGACTTGCCTGCctgcctcctaattccaagaggacagctctggttatttagggttctcaggcagtctcctttggctaacttgacagtctcttctttctcatgccagacctttctcttctttctttgtttgt	ppe-MIR169i-p5	ttctcttctttctttgttt	5'	New	gp2b	...(((((((((((...((((........(((((...((((..(((((....(((((...)))))((....))........))))).)))).)))))........)))).....)))))).)))))...	129	45.7	-31.1	0.5	0	0	0	0	0	0	0	0	0	0	0	0	0	5.5	0	2.5	0	0	0	0	0	0	0	0	0	0
25	24	ppe-MIR169b-p3_2ss10TA21TC	CAAGTTGTCATTGGCTACATC	21	TRINITY_DN29021_c0_g3	-	190	224	ttagtgcccatgatCAAGTTTTCATTGGCTACATC	10	ppe-MIR169b,ppe-MIR169a,mes-MIR169f,mes-MIR169g,vvi-MIR169g,vvi-MIR169d,vvi-MIR169a,vvi-MIR169c,csi-MIR169m,csi-MIR169g,	ppe-MIR169b	agtctcagagtgtttacatgaagcactagagattggattgCAGCCAAGGATGACTTGCCGGcatttacagtactcttgctttatgcagctgaggtttgccggcaagttgtctttggctacattttgctctcttcttctcatgtcagcctctgagact	ppe-MIR169b-p3	caagttgtctttggctacatt	3'	New	gp2b	...(((((.((((........)))).))).))...	35	40	-8.9	0.6	10	14	17	0	6	0	0	0	0	0	0	0	0	0	0	0	0	0	0	0	0	0	0	0	0	0
26	25	ppe-MIR169i-p3_1ss17GT	TTTCTCTTCTTTCTTTTTT	19	TRINITY_DN29176_c0_g1	-	731	794	ggagctgtgggaatcggatgaagagtatctctttTTTCTCTTCTTTCTTTTGTctttaagtggt	1	ppe-MIR169i,	ppe-MIR169i	gcaaacttaaggaaatgaagagagggtctaacatgaagataagagtcttgtttggTAGCCAAGGATGACTTGCCTGCctgcctcctaattccaagaggacagctctggttatttagggttctcaggcagtctcctttggctaacttgacagtctcttctttctcatgccagacctttctcttctttctttgtttgt	ppe-MIR169i-p3	tttctcttctttctttgtt	3'	New	gp2b	...(((...(((...(((.((((((............))))))..)))....)))...)))...	109	39.1	-11.2	0.4	0	0	0	0	2.5	2.5	3	5	11	0	0	0	0	6	2.5	0	2.5	0	0	0	0	0	0	0	4	0
27	25	ppe-MIR169i-p3_1ss17GT	TTTCTCTTCTTTCTTTTTT	19	TRINITY_DN44008_c2_g1	-	31	139	aatagagacacacaaagaaccatcccaactttgctgtacttggcaaaataattgttatatttgctaccatcaattgcattatcaggtcaaTTTCTCTTCTTTTTTTTTT	1	ppe-MIR169i,	ppe-MIR169i	gcaaacttaaggaaatgaagagagggtctaacatgaagataagagtcttgtttggTAGCCAAGGATGACTTGCCTGCctgcctcctaattccaagaggacagctctggttatttagggttctcaggcagtctcctttggctaacttgacagtctcttctttctcatgccagacctttctcttctttctttgtttgt	ppe-MIR169i-p3	tttctcttctttctttgtt	3'	New	gp2b	...(((((....(((((...........))))).((.(((((..((..((((((................))))))..))..)))))))...)))))............	109	31.2	-13.7	0.4	0	0	0	0	2.5	2.5	3	5	11	0	0	0	0	6	2.5	0	2.5	0	0	0	0	0	0	0	4	0
28	26	ppe-MIR169i-p3_1ss18GT	CTTTCTCTTCTTTCTTTTTT	20	TRINITY_DN29782_c1_g9	+	1	131	gccattcggaataatcaaattattctttagtcttaggggaatcccttctctgaatcgttcgtaacaaggtagccgtaggggaacctatggctacaaaataaaaaaaaatggCTTTTTCTTCTTTCTTTTTT	1	ppe-MIR169i,	ppe-MIR169i	gcaaacttaaggaaatgaagagagggtctaacatgaagataagagtcttgtttggTAGCCAAGGATGACTTGCCTGCctgcctcctaattccaagaggacagctctggttatttagggttctcaggcagtctcctttggctaacttgacagtctcttctttctcatgccagacctttctcttctttctttgtttgt	ppe-MIR169i-p3	ctttctcttctttctttgtt	3'	New	gp2b	((((((.((((((((...))))))))((((....((((....))))...))))...............(((((((((((....)))))))))))............))))))...................	131	35.9	-39.1	0.8	0	0	0	0	0	0	0	0	6	0	0	0	0	0	0	0	0	0	0	0	0	0	0	0	0	0
29	27	ppe-MIR169i-p3_2ss1CT19GT	TCTTTCTCTTCTTTCTTTTTT	21	TRINITY_DN33463_c1_g2	+	733	824	attccaccaagaagaataaatgagtgcaagagaagatttggctagctTCTTTCTTTTCTTTCTTTTTTtgtttttttcttttgaggtggggc	2	ppe-MIR169i,ppe-MIR169i,	ppe-MIR169i	gcaaacttaaggaaatgaagagagggtctaacatgaagataagagtcttgtttggTAGCCAAGGATGACTTGCCTGCctgcctcctaattccaagaggacagctctggttatttagggttctcaggcagtctcctttggctaacttgacagtctcttctttctcatgccagacctttctcttctttctttgtttgt	ppe-MIR169i-p3	cctttctcttctttctttgtt	3'	New	gp2b	..((((((.(((((((.(((..((...(((((((((...((....))....)))))))))......))..)))..)))))))..))))))..	92	34.8	-25.6	0.8	0	0	0	0	0	0	0	0	28	0	0	0	0	7	0	0	0	0	0	0	0	0	0	0	0	0
30	28	lus-MIR169b-p3_2ss7GT17AT	ATATACTGGAGGAAGGTGGG	20	TRINITY_DN34362_c0_g3	+	464	580	gtagtgggtttagtacgccccgccggctccgaaacaaacaaaaaggtgcgtgccgcactcacgaaggactgccagtgATATACTGGAGGAAGGTGGGgatgacgtcaagtccgcatg	3	vvi-MIR171i,lus-MIR169b,cme-MIR171i,	lus-MIR169b	ggtttgtcaggcagtcttcttggctatgctgacagactcttttcattcatgttaagctttcttttcctcgaaatcacgatttataaaaagcacatatatatacgggaggaaggagggtcttacatgaagaaaagagtgtattgtttgcTAGCCAAGGATGACTTGCCTGcagct	lus-MIR169b-p3	atatacgggaggaaggaggg	3'	New	gp2b	...((((..((.((...(((((((...(((..............((((((...))))))............((((((...)))))).))).)))))))...))...))..))))...	117	56.4	-39.2	0.6	0	0	0	0	0	0	3	2.5	4.5	3	2.5	11	7.5	0	0	3.5	5.5	0	0	0	0	0	0	0	0	7.5
31	29	ppe-MIR169i-p5_1ss16GT	TTCTCTTCTTTCTTTTTT	18	TRINITY_DN38805_c1_g1	-	383	455	TTCTCTTCTTTCTTTTTGagcttcatctctttctcctcccgcggcaccttcattctctctctctagaagaaca	1	ppe-MIR169i,	ppe-MIR169i	gcaaacttaaggaaatgaagagagggtctaacatgaagataagagtcttgtttggTAGCCAAGGATGACTTGCCTGCctgcctcctaattccaagaggacagctctggttatttagggttctcaggcagtctcctttggctaacttgacagtctcttctttctcatgccagacctttctcttctttctttgtttgt	ppe-MIR169i-p5	ttctcttctttctttgtt	5'	New	gp2b	.........(((((((.(((..............((......))................))).)))))))..	73	43.8	-6.4	0.2	0	0	0	0	0	2.5	3	0	16.5	0	0	0	0	9	2.5	2.5	0	0	0	0	0	0	0	0	0	0
32	30	ptc-MIR169o-p5_2ss1AC17TC	CAGTCAACCTTGGCTTCC	18	TRINITY_DN39622_c0_g1	+	1	74	gtagtggagcaggCAGTCAACCTTGGCTTCCcagcatcaaacaacgaggccgagtatgaagcgcttctagcagg	1	ptc-MIR169o,	ptc-MIR169o	ccttgcgtggAAGCCAAGGATGACTTGCCTGagaattttaggaaggtttctatatgaaagctttttattagttttgcaggaagtcaaccttggctttcctatag	ptc-MIR169o-p5	aagtcaaccttggctttc	5'	New	gp2b	((...(((((..((..(((..(((((((((...............)))))))))..))).)))))))..))...	68	55.4	-22	0.5	133.5	78	108	2.5	0	0	3.5	0	0	0	0	0	0	0	0	0	0	0	0	3	0	2.5	0	2.5	3.5	0
33	30	ptc-MIR169o-p5_2ss1AC17TC	CAGTCAACCTTGGCTTCC	18	TRINITY_DN39622_c0_g2	+	63	130	agtggagcaggCAATCAACCTTGGCTTCCcagcgtcaaacaacgaagcagagtatgaagcgcttctag	1	ptc-MIR169o,	ptc-MIR169o	ccttgcgtggAAGCCAAGGATGACTTGCCTGagaattttaggaaggtttctatatgaaagctttttattagttttgcaggaagtcaaccttggctttcctatag	ptc-MIR169o-p5	aagtcaaccttggctttc	5'	New	gp2b	...(((((..((..(((..((..(((((...............)))))..))..))).)))))))...	68	51.5	-14.8	0.4	133.5	78	108	2.5	0	0	3.5	0	0	0	0	0	0	0	0	0	0	0	0	3	0	2.5	0	2.5	3.5	0
34	31	bna-MIR169c-p5_2ss12GC17TG	TAAAAGTTACTCTAGGGA	18	TRINITY_DN42701_c0_g1	+	115	139	TAAAAGTTACTCTAGGGAtaacagg	1	bna-MIR169c,	bna-MIR169c	agatgaatagaagaatcatatttggTAGCCAAGGATGACTTGCCTAtttcttgagagtaaaatgggcatggtgtcatgttaaaagttactgtaggtagtttcaatttgaccattttccttacaaatgatattaggcagtctccttggctatccttatatgttcttctctctcatct	bna-MIR169c-p5	taaaagttactgtaggta	5'	New	gp2b	.....((((((....)).))))...	25	36	-2.7	0.3	5	7	0	143	141	148	0	0	7	10	14	11	13	12	0	6	0	8	0	0	9	5	6	0	37	23
35	32	cme-MIR169l-p3_2ss13TA17GT	ATGGAAGTGATGAATATT	18	TRINITY_DN44980_c0_g1	+	231	360	ccattcgaatcagattcggagaaattctttatctttagatatatatatatattttaatttattgttttgagcttgaaacattgtatgagattgATGGAAGTGATGAATATTtccccagatgatcgaaact	1	cme-MIR169l,	cme-MIR169l	ttaagttggcaagttatctttggcttacttcataaacttctctcttttcatgttaggtcttttctttcgatattatctttaagaaaatgtttaaaattgtcgagtgattaggtttaaaaaattggatgttactaaaatggaagtgatgtatagtatgagaaaataagagcattgtgtgaTAGCCAAAAATGACTTGCCTGcaacatagt	cme-MIR169l-p3	atggaagtgatgtatagt	3'	New	gp2b	...((((.((((.....(((((.((((.(((.((((..(((((....))))).(((((((..((((((......)))))).......)))))))..))))))).)))).))))).....))))))))...	130	28.5	-23.2	0.6	0	0	0	0	0	0	0	0	15	0	0	0	0	0	0	0	0	0	5	0	0	0	0	0	0	0
36	33	mtr-miR171d	TGATTGAGCCGTGCCAATATC	21	TRINITY_DN38636_c0_g1	-	913	938	gTGATTGAGCCGCGCCAATATCTCTt	138	mtr-MIR171f,mtr-MIR171d,mtr-MIR171e,mtr-MIR171c,mtr-MIR171b,gma-MIR171o,gma-MIR171j,gma-MIR171g,gma-MIR171q,gma-MIR171f,gma-MIR171e,gma-MIR171k,gma-MIR171l,gma-MIR171u,gma-MIR171c,gma-MIR171m,gma-MIR171t,gma-MIR171n,gma-MIR171p,ptc-MIR171i,ptc-MIR171a,ptc-MIR171g,ptc-MIR171h,ptc-MIR171f,ptc-MIR171b,ptc-MIR171e,ptc-MIR171c,ptc-MIR171d,ath-MIR171a,ath-MIR171c,mdm-MIR171d,mdm-MIR171e,mdm-MIR171c,mdm…	mtr-MIR171d	aatgagatattggcctggttcactcagaccaagtgataaaccactaagatacagtattgtacttgtgtggttttgggttTGATTGAGCCGTGCCAATATCtcact	mtr-miR171d	TGATTGAGCCGTGCCAATATC	5'	Yes	gp2b	...((((.((...)))))).......	34	50	-1.9	0.1	5271	8189	8613.5	866.5	810	988.5	9692.5	5758	2266	3692.5	2638	4930.5	3041	5179	5978.5	2383	6749	1188.5	8283	2659	1153.5	2563.5	1777	1163.5	972.5	1094
36	34	gma-miR171k-3p_2ss11CT19AT	TTGAGCCGCGTCAATATCTCT	21	TRINITY_DN38636_c0_g1	-	913	938	gTGATTGAGCCGCGCCAATATCTCTt	138	mtr-MIR171f,mtr-MIR171d,mtr-MIR171e,mtr-MIR171c,mtr-MIR171b,gma-MIR171o,gma-MIR171j,gma-MIR171g,gma-MIR171q,gma-MIR171f,gma-MIR171e,gma-MIR171k,gma-MIR171l,gma-MIR171u,gma-MIR171c,gma-MIR171m,gma-MIR171t,gma-MIR171n,gma-MIR171p,ptc-MIR171i,ptc-MIR171a,ptc-MIR171g,ptc-MIR171h,ptc-MIR171f,ptc-MIR171b,ptc-MIR171e,ptc-MIR171c,ptc-MIR171d,ath-MIR171a,ath-MIR171c,mdm-MIR171d,mdm-MIR171e,mdm-MIR171c,mdm…	gma-MIR171k	gagaaagCGATGTTGGTGAGGTTCAATCcgaagacggatttacatgtagaagcagtaaaatacgatctcagaTTGAGCCGCGCCAATATCACTttatc	gma-miR171k-3p	TTGAGCCGCGCCAATATCACT	3'	Diff	gp2b	...((((.((...)))))).......	38	50	-1.9	0.1	1324	1974.5	2213	540.5	566	574.5	7386	3863.5	258	2822	1560	5057	4310.5	1974	4454	1803	2591	454	4510	1639	947.5	12449.5	7695	5528.5	4444.5	4946
37	33	mtr-miR171d	TGATTGAGCCGTGCCAATATC	21	TRINITY_DN27835_c0_g1	-	729	762	gTGATTGAGCCGCGCCAATATCgattgcgcgaga	114	mtr-MIR171f,mtr-MIR171d,mtr-MIR171c,gma-MIR171g,gma-MIR171q,gma-MIR171f,gma-MIR171e,gma-MIR171u,gma-MIR171o,gma-MIR171j,gma-MIR171c,gma-MIR171i,gma-MIR171a,ptc-MIR171a,ptc-MIR171f,ptc-MIR171g,ptc-MIR171h,ptc-MIR171e,ptc-MIR171i,ptc-MIR171b,ath-MIR171a,ath-MIR171c,ath-MIR171b,mdm-MIR171c,mdm-MIR171e,mdm-MIR171d,mdm-MIR171m,mdm-MIR171q,mdm-MIR171n,mdm-MIR171o,mdm-MIR171h,mdm-MIR171f,mdm-MIR171g,lja…	mtr-MIR171d	aatgagatattggcctggttcactcagaccaagtgataaaccactaagatacagtattgtacttgtgtggttttgggttTGATTGAGCCGTGCCAATATCtcact	mtr-miR171d	TGATTGAGCCGTGCCAATATC	5'	Yes	gp2b	..........(((((.(((....))))))))...	34	55.9	-8.4	0.4	5271	8189	8613.5	866.5	810	988.5	9692.5	5758	2266	3692.5	2638	4930.5	3041	5179	5978.5	2383	6749	1188.5	8283	2659	1153.5	2563.5	1777	1163.5	972.5	1094
38	34	gma-miR171k-3p_2ss11CT19AT	TTGAGCCGCGTCAATATCTCT	21	TRINITY_DN38636_c0_g5	-	267	304	ggagagagctggtgaTTGAGCCGCGCCAATATCTCTtg	154	mtr-MIR171e,mtr-MIR171c,mtr-MIR171d,mtr-MIR171f,mtr-MIR171b,gma-MIR171k,gma-MIR171l,gma-MIR171u,gma-MIR171t,gma-MIR171c,gma-MIR171o,gma-MIR171j,gma-MIR171g,gma-MIR171q,gma-MIR171f,gma-MIR171e,gma-MIR171m,gma-MIR171a,gma-MIR171i,gma-MIR171n,gma-MIR171p,ptc-MIR171c,ptc-MIR171d,ptc-MIR171e,ptc-MIR171b,ptc-MIR171i,ptc-MIR171a,ptc-MIR171f,ptc-MIR171g,ptc-MIR171h,ath-MIR171a,ath-MIR171c,ath-MIR171b,mdm…	gma-MIR171k	gagaaagCGATGTTGGTGAGGTTCAATCcgaagacggatttacatgtagaagcagtaaaatacgatctcagaTTGAGCCGCGCCAATATCACTttatc	gma-miR171k-3p	TTGAGCCGCGCCAATATCACT	3'	Diff	gp2b	.((((((..(((((.........)))))...)))))).	38	55.3	-12.2	0.6	1324	1974.5	2213	540.5	566	574.5	7386	3863.5	258	2822	1560	5057	4310.5	1974	4454	1803	2591	454	4510	1639	947.5	12449.5	7695	5528.5	4444.5	4946
39	35	vvi-MIR171i-p5_2ss3AG17TA	GAGGAAGGTGGGGATGATG	19	TRINITY_DN23182_c0_g1	+	58	121	GAGGAAGGTGGGGATGACGtcaggtcctcatggcccttatgggtagggctacacacgtcataca	1	vvi-MIR171i,	vvi-MIR171i	gaagaaggtggggatgttggaatggctcaatcaaatcaaatctcccaagggttttgggtcctttaatcTGATTGAGCCGTGCCAATATCatcatgttcacttc	vvi-MIR171i-p5	gaagaaggtggggatgttg	5'	New	gp2b	.............(((((((..((((((....((((....))))))))))....)))))))...	64	56.2	-21	0.6	0	0	0	0	0	0	3	0	4.5	0	0	0	0	0	0	0	3	0	0	0	0	0	0	0	0	0
40	36	mtr-miR171e-3p_L-2R+1	ATTGAGCCGCGCCAATATCA	20	TRINITY_DN23484_c2_g1	-	666	700	ATTGAGCCGCGCCAAAATCAcatgcgcgagttgta	41	mtr-MIR171e,gma-MIR171k,gma-MIR171l,gma-MIR171c,gma-MIR171o,gma-MIR171f,gma-MIR171q,ptc-MIR171d,ptc-MIR171c,ptc-MIR171h,ptc-MIR171g,ath-MIR171a,mdm-MIR171k,mdm-MIR171l,mdm-MIR171j,mdm-MIR171n,mdm-MIR171o,mdm-MIR171e,mdm-MIR171c,mdm-MIR171m,lja-MIR171d,aly-MIR171a,ppe-MIR171b,ppe-MIR171g,mes-MIR171e,mes-MIR171f,vvi-MIR171e,vvi-MIR171f,nta-MIR171b,csi-MIR171h,lus-MIR171f,lus-MIR171a,cme-MIR171g,cme…	mtr-MIR171e	aaagCGATGTTGGTGAGGTTCAATCcgaagacggatttacatgtatagagttgtaaaatacgatctcAGATTGAGCCGCGCCAATATCacttt	mtr-miR171e-3p	AGATTGAGCCGCGCCAATATC	5'	Diff	gp2b	....((((((((...........))))).)))...	35	51.4	-9.1	0.5	0	0	0	0	0	0	0	0	0	0	0	0	0	0	0	0	0	0	0	0	0	0	9	0	0	0
41	37	cpa-MIR171a-p3_2ss11TG17TG	TTTGGGTCTTGTAATTGG	18	TRINITY_DN36903_c0_g1	+	348	392	taaatactgatacagggctctTTTGGGTCTTGTAATTGGaatgag	1	cpa-MIR171a,	cpa-MIR171a	tgttggaatggctcaatcaaatcaaatctccaaagtctttgattttgggtcttttaattTGATTGAGCCGTGCCAATATC	cpa-MIR171a-p3	tttgggtcttttaattTG	3'	New	gp2b	......(..(((((((((((....)))))))))).)..)......	45	37.8	-14.2	0.8	0	0	0	0	0	0	0	0	0	0	0	0	3.5	0	0	0	2.5	0	0	0	0	0	2.5	0	2.5	4
42	37	cpa-MIR171a-p3_2ss11TG17TG	TTTGGGTCTTGTAATTGG	18	TRINITY_DN36903_c0_g2	+	461	505	taaatactgatacagggctctTTTGGGTCTTGTAATTGGaatgag	1	cpa-MIR171a,	cpa-MIR171a	tgttggaatggctcaatcaaatcaaatctccaaagtctttgattttgggtcttttaattTGATTGAGCCGTGCCAATATC	cpa-MIR171a-p3	tttgggtcttttaattTG	3'	New	gp2b	......(..(((((((((((....)))))))))).)..)......	45	37.8	-14.2	0.8	0	0	0	0	0	0	0	0	0	0	0	0	3.5	0	0	0	2.5	0	0	0	0	0	2.5	0	2.5	4
43	38	mtr-miR171e-5p	CGATGTTGGTGAGGTTCAATC	21	TRINITY_DN40558_c0_g1	+	119	215	actgcttagCGTTGTTGGTGAGGTTCAATCgaaggagttgtttgggtcacggagaagaaccaaaggaggaggctgcagcagcaacagaagaagcacc	16	mtr-MIR171e,gma-MIR171k,gma-MIR171l,ptc-MIR171c,ptc-MIR171d,mdm-MIR171k,mdm-MIR171l,mdm-MIR171j,lja-MIR171d,ppe-MIR171b,mes-MIR171f,vvi-MIR171e,vvi-MIR171f,nta-MIR171b,sly-MIR171d,rco-MIR171g,	mtr-MIR171e	aaagCGATGTTGGTGAGGTTCAATCcgaagacggatttacatgtatagagttgtaaaatacgatctcAGATTGAGCCGCGCCAATATCacttt	mtr-miR171e-5p	CGATGTTGGTGAGGTTCAATC	5'	Yes	gp2b	..(((((...(((((((.((..((((..((....))....(((((.((........)).)))))....)).))..)).))))))).....)))))..	97	51.5	-24.6	0.5	10	8	5	0	0	0	34	25	13	30	19	23	40	15	59	19	38	8	63	15	0	106	69	43	26	36
44	39	mtr-miR172a_2ss1AG7CT	GGAATCTTGATGATGCTGCAG	21	TRINITY_DN28507_c1_g1	-	511	552	gagaactgctgtgGGAATCCTGATGATGCTGCAGcagttgca	40	mtr-MIR172a,gma-MIR172d,gma-MIR172e,gma-MIR172c,gma-MIR172i,gma-MIR172l,ptc-MIR172d,ptc-MIR172g,ptc-MIR172e,ptc-MIR172h,ath-MIR172e,mdm-MIR172i,mdm-MIR172j,mdm-MIR172k,mdm-MIR172l,gra-MIR172a,stu-MIR172d,aly-MIR172e,ppe-MIR172d,ppe-MIR172c,mes-MIR172e,mes-MIR172f,vvi-MIR172c,nta-MIR172j,csi-MIR172d,csi-MIR172c,lus-MIR172e,lus-MIR172g,lus-MIR172i,cme-MIR172d,cme-MIR172a,sly-MIR172d,bra-MIR172d,bna…	mtr-MIR172a	gccggtggagcatcatcaggattcacaagattttgaagggtttaatttgttttgattgtttcaaatagattagccctttgacatatgAGAATCCTGATGATGCTGCAGctgca	mtr-miR172a	AGAATCCTGATGATGCTGCAG	3'	Diff	gp2b	...((((((((..(..(((.....))).)..))))))))...	102	52.4	-17.1	0.8	6.5	6.5	10	8	10	16.5	423.5	386.5	53.5	167	144.5	319.5	263.5	519.5	488.5	182.5	375.5	78.5	421	97	49	1029.5	730.5	473.5	132	178
45	39	mtr-miR172a_2ss1AG7CT	GGAATCTTGATGATGCTGCAG	21	TRINITY_DN46024_c1_g1	-	1222	1323	tgggtcaagagggtctcatcagagagtaaaatccatttttctggtatagccaattttggggtcaggtagttatctgctgtgGGAATCCTGATGATGCTGCAG	40	mtr-MIR172a,gma-MIR172c,gma-MIR172l,gma-MIR172i,gma-MIR172d,gma-MIR172e,ptc-MIR172h,ptc-MIR172d,ptc-MIR172g,ptc-MIR172e,ath-MIR172e,mdm-MIR172i,mdm-MIR172j,mdm-MIR172k,mdm-MIR172l,gra-MIR172a,stu-MIR172d,aly-MIR172e,ppe-MIR172d,ppe-MIR172c,mes-MIR172e,mes-MIR172f,vvi-MIR172c,nta-MIR172j,csi-MIR172c,csi-MIR172d,lus-MIR172i,lus-MIR172e,lus-MIR172g,cme-MIR172d,cme-MIR172a,sly-MIR172d,bra-MIR172d,bna…	mtr-MIR172a	gccggtggagcatcatcaggattcacaagattttgaagggtttaatttgttttgattgtttcaaatagattagccctttgacatatgAGAATCCTGATGATGCTGCAGctgca	mtr-miR172a	AGAATCCTGATGATGCTGCAG	3'	Diff	gp2b	...((((..(((((((((.((((((.(((...((...(..((((.....))).....)..)...))...)))))).))))))).)))))..)))).......	102	45.1	-23.3	0.5	6.5	6.5	10	8	10	16.5	423.5	386.5	53.5	167	144.5	319.5	263.5	519.5	488.5	182.5	375.5	78.5	421	97	49	1029.5	730.5	473.5	132	178
46	40	mtr-miR172a	AGAATCCTGATGATGCTGCAG	21	TRINITY_DN28507_c2_g5	-	126	165	gctgtactgttgggagaagAGAATCCTGATGATGCTGCAG	89	mtr-MIR172a,mtr-MIR172b,mtr-MIR172c,mtr-MIR172d,gma-MIR172f,gma-MIR172a,gma-MIR172j,gma-MIR172b,gma-MIR172g,gma-MIR172h,ptc-MIR172b,ptc-MIR172c,ptc-MIR172a,ptc-MIR172f,ath-MIR172a,ath-MIR172d,ath-MIR172b,ath-MIR172c,mdm-MIR172p,mdm-MIR172d,mdm-MIR172f,mdm-MIR172a,mdm-MIR172m,mdm-MIR172e,mdm-MIR172c,mdm-MIR172n,mdm-MIR172b,mdm-MIR172o,mdm-MIR172g,mdm-MIR172h,lja-MIR172c,lja-MIR172a,lja-MIR172b,gra…	mtr-MIR172a	gccggtggagcatcatcaggattcacaagattttgaagggtttaatttgttttgattgtttcaaatagattagccctttgacatatgAGAATCCTGATGATGCTGCAGctgca	mtr-miR172a	AGAATCCTGATGATGCTGCAG	3'	Yes	gp2b	((.(((..((..(((........)))..))..))).))..	47	50	-13.3	0.7	3	11	17.5	4.5	4.5	9.5	46.5	35	29	42	24	0	0	4	6	0	0	0	0	0	0	22.5	11.5	11	0	0
47	40	mtr-miR172a	AGAATCCTGATGATGCTGCAG	21	TRINITY_DN40809_c0_g1	-	1394	1440	agagcagtagtagacacagatgAGAATCCTGATGATGCTGCAGtaga	89	mtr-MIR172a,mtr-MIR172d,mtr-MIR172c,mtr-MIR172b,gma-MIR172a,gma-MIR172h,gma-MIR172j,gma-MIR172f,gma-MIR172g,gma-MIR172b,ptc-MIR172a,ptc-MIR172c,ptc-MIR172b,ptc-MIR172f,ath-MIR172b,ath-MIR172c,ath-MIR172d,ath-MIR172a,mdm-MIR172g,mdm-MIR172h,mdm-MIR172b,mdm-MIR172o,mdm-MIR172c,mdm-MIR172n,mdm-MIR172d,mdm-MIR172f,mdm-MIR172p,mdm-MIR172e,mdm-MIR172a,mdm-MIR172m,lja-MIR172c,lja-MIR172a,lja-MIR172b,gra…	mtr-MIR172a	gccggtggagcatcatcaggattcacaagattttgaagggtttaatttgttttgattgtttcaaatagattagccctttgacatatgAGAATCCTGATGATGCTGCAGctgca	mtr-miR172a	AGAATCCTGATGATGCTGCAG	3'	Yes	gp2b	...((.((((((..(((((((....)).))).)).)))))).))...	47	44.7	-9.4	0.4	3	11	17.5	4.5	4.5	9.5	46.5	35	29	42	24	0	0	4	6	0	0	0	0	0	0	22.5	11.5	11	0	0
48	41	vvi-MIR172d-p5_2ss7GT17CT	TGGAAGTGCAGTGATGTA	18	TRINITY_DN32522_c1_g2	+	220	272	cgataggtgtcaagTGGAAGTGCAGTGATGTAtgcagctgaggcatcctaaca	1	vvi-MIR172d,	vvi-MIR172d	gttagctgatgcagcatcatcaagattcacacccaatggaagggcagtgatgcaatctctgccaaagattttgagaTGAGAATCTTGATGATGCTGCATtcgcagtgaa	vvi-MIR172d-p5	tggaagggcagtgatgca	5'	New	gp2b	...((((((((.(((....(((((....)))))...)))..)))).))))...	53	49.1	-16.4	0.6	0	0	0	12	12	12	0	0	0	0	0	0	0	0	0	0	0	0	0	0	0	0	0	0	5	0
49	42	nta-MIR172e-p3_2ss14CG18TA	TTGGAACGATACAGAGAA	18	TRINITY_DN38871_c0_g1	+	115	260	aaagtcagtctgattgatgtcgtcccagtcccacatcgaaacttcgacgttatagacatggagtttataagaaagaagaaaagagaagacattgtcccttcggggacatccgataaaaTTGGAACGATACAGAGAAgattagcatg	2	nta-MIR172e,nta-MIR172f,	nta-MIR172e	gtttgcagatgtagcatcatcaagattcacataaaaaacgcatggtgatgagctgatgaaatgacattaatggccaaggcagctttctgaaggtgAGAATCTTGATGATGCTGCATcagcaataaacgactacctgatttatcattatgccattggaacgatacacagataattagcataattcatgtgcaagaatgccacgggtacatggtatggttcaattgatacagtcgttgtttgcgggtgtagcatcatcaagattcacatgaaaaggcaaggtgaaatgaaattaattaagagccatggctttttgaaggtgAGAATCTTGATGATGCTGCATcagcaataa	nta-MIR172e-p3	ttggaacgatacacagat	3'	New	gp2b	...(..(((((..((..((((((.(((((.....((((...((((....((((((((.....))))))))....))))..............((((((....))))))..))))...))))).))))))..))..)))))..)...	146	41.1	-44.3	0.7	0	0	0	53	46	79	55	0	0	195	126	167	80	41	27	96	54	53	71	67	110	5	5	0	106	71
50	43	gma-MIR319e-p3_2ss17CT18TA	GGAGGTAAATTTCTTCTA	18	TRINITY_DN37915_c0_g5	+	103	240	tgccttccaagtgccctggaacgggacgccggagagggtgagagccccgtacagttggacactaagcccatgtgaagctccttcgacgagtcgagtagtttgggaatgctgctcaaaatgGGAGGTAAATTTCTTCTA	2	gma-MIR319e,gma-MIR319h,	gma-MIR319e	atagttgaagagagcttccttcagtccactcatggatgggtaaggggttagaattagctgctgactcattcattcaaacacaatagatctggcatcatgatatgctattgtgaatgtgtgaatgatgcgggaggtaaatttcttccttttcctgtctgtgcTTGGACTGAAGGGAGCTCCCtctaactgt	gma-MIR319e-p3	ggaggtaaatttcttcct	3'	New	gp2b	(((((((((.((((((......))).))).((((.((((....))))..((((...((........))..))))...))))...........(((((((........)))))))....)))))))))...........	138	53.6	-45.1	0.6	0	0	0	0	0	0	0	0	0	0	0	0	0	0	0	0	0	0	0	0	0	0	0	0	16	9
51	44	mtr-miR393a_1ss21CT	TCCAAAGGGATCGCATTGATT	21	TRINITY_DN30765_c0_g6	-	1567	1591	gacaTCCAAAGGGATCGCATTGTTT	55	mtr-MIR393b,mtr-MIR393a,gma-MIR393c,gma-MIR393i,gma-MIR393a,gma-MIR393g,gma-MIR393d,gma-MIR393e,gma-MIR393j,gma-MIR393k,gma-MIR393f,gma-MIR393h,ptc-MIR393c,ptc-MIR393a,ptc-MIR393b,ath-MIR393a,ath-MIR393b,mdm-MIR393a,mdm-MIR393f,mdm-MIR393h,mdm-MIR393g,mdm-MIR393b,mdm-MIR393c,mdm-MIR393d,mdm-MIR393e,stu-MIR393,aly-MIR393b,aly-MIR393a,ppe-MIR393a,ppe-MIR393b,mes-MIR393a,mes-MIR393d,mes-MIR393b,mes-…	mtr-MIR393a	aactgcaacttgaggaggcaTCCAAAGGGATCGCATTGATCctataatatttcaactttagtcactttaattttctctcatataatacttaattgggatcatgccatccctttggatttctcctttagtagctac	mtr-miR393a	TCCAAAGGGATCGCATTGATC	3'	Diff	gp2b	...((((....))))..........	25	44	-2.7	0.2	51	53	68	19	41	20	31	31	0	26	13	45	25	0	26	20	42	6	101	16	0	131.5	76.5	79	19	20
52	45	gma-miR394a-5p	TTGGCATTCTGTCCACCTCC	20	TRINITY_DN26466_c2_g7	+	92	241	gttggtttaacaaagtgtttcttacagagtttaTTGGCATTCTGTCCACCTCCctcctctcagaaaaaaagcccgtatttctctctaaaatggaatggaggtgggcatactgccaactgagctctgttagtttctctttgtaaaaccctc	42	gma-MIR394d,gma-MIR394e,gma-MIR394c,gma-MIR394a,gma-MIR394f,gma-MIR394g,gma-MIR394b,ptc-MIR394a,ptc-MIR394b,ath-MIR394b,ath-MIR394a,mdm-MIR394b,mdm-MIR394a,stu-MIR384,aly-MIR394a,aly-MIR394b,ppe-MIR394b,ppe-MIR394a,mes-MIR394b,mes-MIR394a,mes-MIR394c,vvi-MIR394a,vvi-MIR394b,vvi-MIR394c,nta-MIR394,csi-MIR394a,csi-MIR394b,lus-MIR394a,lus-MIR394b,cme-MIR394b,cme-MIR394a,sly-MIR394,bna-MIR394b,bna-MI…	gma-MIR394b	taacagagtttaTTGGCATTCTGTCCACCTCCacttcctactctctctctgagccacatgttcgtgaagttggAGGTGGGCATACTGTCAACTgagttctgttg	gma-miR394a-5p	TTGGCATTCTGTCCACCTCC	5'	Yes	gp2b	...(((((.((((((.....((.((((((((((((((((...(((((((((((.(((....(((...(((.......)))...))).....)))..)))))))))))...)))))).)))))))))).)).....)))))).)))))...	90	42	-58.5	0.9	5487	6429	7823.5	1645	1652	1553	1082	1747	195.5	1971	891	1774.5	2878	2468.5	2064.5	1498.5	1718	407	2293	967.5	567.5	6973.5	4245	3064	4105.5	3780
53	45	gma-miR394a-5p	TTGGCATTCTGTCCACCTCC	20	TRINITY_DN30822_c0_g7	-	1651	1740	gtTTGGCATTCTGTCAACCTCCttccacaatagagtcatcttctgcagctcccatatgcacacgcatgtggcagcattctttgtcagcaa	42	gma-MIR394e,gma-MIR394g,gma-MIR394b,gma-MIR394d,gma-MIR394c,gma-MIR394a,gma-MIR394f,ptc-MIR394a,ptc-MIR394b,ath-MIR394b,ath-MIR394a,mdm-MIR394a,mdm-MIR394b,stu-MIR384,aly-MIR394a,aly-MIR394b,ppe-MIR394a,ppe-MIR394b,mes-MIR394c,mes-MIR394b,mes-MIR394a,vvi-MIR394a,vvi-MIR394b,vvi-MIR394c,nta-MIR394,csi-MIR394a,csi-MIR394b,lus-MIR394a,lus-MIR394b,cme-MIR394a,cme-MIR394b,sly-MIR394,bna-MIR394a,bna-MI…	gma-MIR394f	cgtagccattTTGGCATTCTGTCCACCTCCactaatattaaatggtgacagttggaggtggccagtaggccaaacgggctctgt	gma-miR394a-5p	TTGGCATTCTGTCCACCTCC	5'	Yes	gp2b	(.((((((...................((..(((....)))..))..(((.((((((((....)))))))).)))......)))))))..	90	47.8	-22.7	0.5	5487	6429	7823.5	1645	1652	1553	1082	1747	195.5	1971	891	1774.5	2878	2468.5	2064.5	1498.5	1718	407	2293	967.5	567.5	6973.5	4245	3064	4105.5	3780
54	46	bra-MIR395a-p3_2ss11AG17GC	AAGATTACCCGCTGAACT	18	TRINITY_DN37915_c0_g3	+	24	55	acctcagatcgggcAAGATTACCCGCTGAACT	2	bra-MIR395a,bna-MIR395a,	bra-MIR395a	atgtctcctagaGTTCCTCTGAGCACTTCATTGggtatacaatttcttatgaagattacccaCTGAAGTGTTTGGGGGAACTCctggacccat	bra-MIR395a-p3	aagattacccaCTGAAGT	3'	New	gp2b	...((((..((((........))))))))...	32	53.1	-8.8	0.5	0	0	0	0	0	0	0	7	0	0	0	0	0	5	0	5	13	0	0	10	0	0	0	0	0	0
55	47	gma-MIR396a-p3_2ss3TA18TC	CAAGCATGCCATGGCACC	18	TRINITY_DN32257_c0_g2	+	807	840	cacgccacggccatgcCAAGCATGCCATGGCACC	1	gma-MIR396a,	gma-MIR396a	tcatggctctctttgtattcTTCCACAGCTTTCTTGAACTGcatccaaagagttcctttgcatgcatgccatggcactcttactcccaaatcttgttttgcggTTCAATAAAGCTGTGGGAAGatacagatagggtcaac	gma-MIR396a-p3	catgcatgccatggcact	3'	New	gp2b	...((((.((.(((((...))))))).))))...	34	67.6	-15.3	0.7	17	6	10	0	0	0	0	0	0	0	0	0	0	0	0	0	0	0	0	0	0	0	0	0	0	0
56	48	cme-MIR396d-p3_1ss6AG	AAAAAGAAAAAAGAAACTT	19	TRINITY_DN39092_c1_g1	-	2	139	tcctttcgaattttttttccccactgacttgattcgtataagccttcaagccaagtaaaaatgaagagcgttttcactgatttgataggtggatcggtctggcttttgctttgaaggagAAAAAGAAAAAAGAAACTG	1	cme-MIR396d,	cme-MIR396d	gccatgcttTTCCACAGCTTTCTTGAACTTtctctgctcttcccttcttctcacaatcaattttgtaagtaaaatctctcttagattttacccaaaagttaaatttaaaaaaaaaaaaaaagaaactttggaagttcaagaaagctgtgggagaacatggca	cme-MIR396d-p3	aaaaaaaaaaaagaaactt	3'	New	gp2b	...((((...(((((((((.((...((((.(((((......(((((((((...(((.((((((.....)))))).)))..))))).))))))))))))).(((....))).....)).)))))))))....))))...	138	37.7	-31.6	0.6	0	0	0	0	0	0	0	0	6	0	0	0	0	0	0	0	0	0	0	0	0	0	0	0	0	0
57	49	lus-MIR396e-p5_2ss9GA19GC	ATGGGAGAACTCAAGAAAC	19	TRINITY_DN42353_c0_g2	+	1	134	gATGGGAGAACTCAAGAAACtggttgaagagggtaaaatcaagtatgtaggtctctcagaggcctcggcttcgacaattagaagggctcatgctgttcatcccataacagcagtgcaattggagtggtccttgt	2	lus-MIR396e,lus-MIR396b,	lus-MIR396e	TTCCACAGCTTTCTTGAACTTtcctatctatactcgattagccctttttccaccctcaattgcggcttattaatatatataaatggagcatttccatgggagagctcaagaaagctgtggga	lus-MIR396e-p5	atgggagagctcaagaaag	5'	New	gp2b	...((((..((((.........(((((((..((.....))......(.(((((((...))))))))..)))))))......((..((...(((((((........)))))))..))..)).))))..))))...	134	47	-39.1	0.6	0	0	0	0	0	0	0	0	5	0	0	0	0	0	0	0	0	0	0	0	0	0	0	0	0	0
58	50	cme-MIR396d-p5_1ss6AG	AAAAAGAAAAAAGAAACTT	19	TRINITY_DN45006_c1_g1	-	121	206	AAAAAGAAAAAAGAAAATTaactgtaatctcaaaatgtatctatgttatgaagcaagaaatgctgagggaaaatgttaattttaca	1	cme-MIR396d,	cme-MIR396d	gccatgcttTTCCACAGCTTTCTTGAACTTtctctgctcttcccttcttctcacaatcaattttgtaagtaaaatctctcttagattttacccaaaagttaaatttaaaaaaaaaaaaaaagaaactttggaagttcaagaaagctgtgggagaacatggca	cme-MIR396d-p5	aaaaaaaaaaaagaaactt	5'	New	gp2b	.............(((((((((.....(((((....((((((.((((....)))))))..))))))))......)))))))))...	86	24.4	-13.1	0.6	0	0	0	0	0	0	0	0	6	0	0	0	0	0	0	0	0	0	0	0	0	0	0	0	0	0
59	51	lus-MIR396e-p3_2ss9GA19GC	ATGGGAGAACTCAAGAAAC	19	TRINITY_DN46295_c1_g2	+	616	689	cttgctttgttctttgattcttttttttgtaacccatcttttcaccagATGGGAGAACTCAAGAAACtagttga	2	lus-MIR396e,lus-MIR396b,	lus-MIR396e	TTCCACAGCTTTCTTGAACTTtcctatctatactcgattagccctttttccaccctcaattgcggcttattaatatatataaatggagcatttccatgggagagctcaagaaagctgtggga	lus-MIR396e-p3	atgggagagctcaagaaag	3'	New	gp2b	...(((..(((..((((((((...........(((((((.......))))))))))).))))..))).)))...	74	35.1	-15.9	0.6	0	0	0	0	0	0	0	0	5	0	0	0	0	0	0	0	0	0	0	0	0	0	0	0	0	0
60	52	mtr-miR397-5p_1ss10GC	TCATTGAGTCCAGCGTTGATG	21	TRINITY_DN24399_c1_g7	-	696	740	ccagcgatcttgaagaagagttctTCATTGAGTCCAGCATTGATG	28	mtr-MIR397,gma-MIR397b,gma-MIR397a,ptc-MIR397a,ptc-MIR397b,ath-MIR397a,mdm-MIR397b,mdm-MIR397a,lja-MIR397,stu-MIR397,aly-MIR397b,aly-MIR397a,ppe-MIR397,mes-MIR397b,mes-MIR397,vvi-MIR397a,nta-MIR397,csi-MIR397,lus-MIR397b,lus-MIR397a,cme-MIR397,sly-MIR397,bna-MIR397b,bna-MIR397a,cas-MIR397,rco-MIR397,ssl-MIR397,dpr-MIR397,	mtr-MIR397	ttggagaaacaTCATTGAGTGCAGCGTTGATGaaatcttatgtagcatctagctatcttatagatatcaaatattgcatgcttaatttcaTCTACGCTACACTCAATTATGtttttttaa	mtr-miR397-5p	TCATTGAGTGCAGCGTTGATG	3'	Diff	gp2b	...((...((..(.((((....)))).)..))....)).......	45	44.4	-10	0.5	2115	2666.5	3410.5	1071	1013	1007.5	191.5	288	14	273.5	361	840.5	294	46	376.5	160	349.5	76	471.5	103	44	291	204	164	312.5	319.5
61	53	dpr-MIR397-p5_2ss14TC18AC	TCAATGCTGCACTCAATCA	19	TRINITY_DN24572_c2_g1	+	724	766	TCAACGCTGCACTCAATCAacaactcttcttcgcggtagccaa	1	dpr-MIR397,	dpr-MIR397	ttaaaaacgCCATTGAGTGCAGCGTTGATGatattgcatttgttcgatctctttagtcctgatttatcgattgttatatcgtcaatgctgcacttaataacgtttttaa	dpr-MIR397-p5	tcaatgctgcacttaataa	5'	New	gp2b	.....(((((.........................)))))...	43	48.8	-4	0.2	0	6	0	0	0	6	0	0	0	0	0	0	0	0	0	0	0	0	0	0	0	0	0	0	0	0
62	54	mtr-miR397-5p_1ss2CA	TAATTGAGTGCAGCGTTGATG	21	TRINITY_DN24572_c2_g1	-	722	803	TGATTGAGTGCAGCGTTGATGattcggaggagaattgtttccccggaatccacagtgaatctgactgtgcctttattggaac	28	mtr-MIR397,gma-MIR397b,gma-MIR397a,ptc-MIR397a,ptc-MIR397b,ath-MIR397a,mdm-MIR397b,mdm-MIR397a,lja-MIR397,stu-MIR397,aly-MIR397b,aly-MIR397a,ppe-MIR397,mes-MIR397b,mes-MIR397,vvi-MIR397a,nta-MIR397,csi-MIR397,lus-MIR397a,lus-MIR397b,cme-MIR397,sly-MIR397,bna-MIR397b,bna-MIR397a,cas-MIR397,rco-MIR397,ssl-MIR397,dpr-MIR397,	mtr-MIR397	ttggagaaacaTCATTGAGTGCAGCGTTGATGaaatcttatgtagcatctagctatcttatagatatcaaatattgcatgcttaatttcaTCTACGCTACACTCAATTATGtttttttaa	mtr-miR397-5p	TCATTGAGTGCAGCGTTGATG	5'	Diff	gp2b	...............(..(((((((((.(((((....))))))))))...((((((.......))))))...))))..)...	106	46.3	-18.5	0.5	100.5	150	172	18	17	21	54	176.5	18.5	211	207	868	56	6.5	126	43.5	197	46	296	14	20	17	10.5	6.5	89.5	102.5
63	54	mtr-miR397-5p_1ss2CA	TAATTGAGTGCAGCGTTGATG	21	TRINITY_DN36837_c0_g4	-	124	229	cgtcagtgactattggtacagtataactagcatcaacggcaacaactgtcatgttgtggtttgctatcttgaaaaagaactggTTATTGAGTGCAGCGTTGATGat	28	mtr-MIR397,gma-MIR397b,gma-MIR397a,ptc-MIR397a,ptc-MIR397b,ath-MIR397a,mdm-MIR397b,mdm-MIR397a,lja-MIR397,stu-MIR397,aly-MIR397b,aly-MIR397a,ppe-MIR397,mes-MIR397b,mes-MIR397,vvi-MIR397a,nta-MIR397,csi-MIR397,lus-MIR397a,lus-MIR397b,cme-MIR397,sly-MIR397,bna-MIR397b,bna-MIR397a,cas-MIR397,rco-MIR397,ssl-MIR397,dpr-MIR397,	mtr-MIR397	ttggagaaacaTCATTGAGTGCAGCGTTGATGaaatcttatgtagcatctagctatcttatagatatcaaatattgcatgcttaatttcaTCTACGCTACACTCAATTATGtttttttaa	mtr-miR397-5p	TCATTGAGTGCAGCGTTGATG	3'	Diff	gp2b	(((((..(.((....((((...((((((((.......(((((((((......)))))....)))).((((....)))).))))))))...)))))))..)))))..	106	40.6	-27.1	0.6	100.5	150	172	18	17	21	54	176.5	18.5	211	207	868	56	6.5	126	43.5	197	46	296	14	20	17	10.5	6.5	89.5	102.5
64	55	mtr-miR397-5p_R-2_1ss10GC	TCATTGAGTCCAGCGTTGA	19	TRINITY_DN31238_c0_g4	-	737	782	gttctggattctgaagaatagatcgTCATTGAGTGCAGCGTTGAtc	24	mtr-MIR397,gma-MIR397b,gma-MIR397a,ptc-MIR397a,ath-MIR397a,mdm-MIR397b,mdm-MIR397a,lja-MIR397,aly-MIR397b,aly-MIR397a,ppe-MIR397,mes-MIR397b,vvi-MIR397a,nta-MIR397,csi-MIR397,lus-MIR397b,lus-MIR397a,cme-MIR397,sly-MIR397,bna-MIR397a,bna-MIR397b,cas-MIR397,rco-MIR397,ssl-MIR397,	mtr-MIR397	ttggagaaacaTCATTGAGTGCAGCGTTGATGaaatcttatgtagcatctagctatcttatagatatcaaatattgcatgcttaatttcaTCTACGCTACACTCAATTATGtttttttaa	mtr-miR397-5p	TCATTGAGTGCAGCGTTGATG	3'	Diff	gp2b	...(((.(((((((.((.....)).)))..)))).)))........	46	43.5	-7.3	0.4	15	30	31	15	11	9	3.5	8.5	5	12.5	2.5	24.5	0	0	3.5	0	2.5	3.5	7	0	0	0	0	0	3	3.5
65	56	mtr-miR399c	TGCCAAAGGAGATTTGCCCTG	21	TRINITY_DN25615_c1_g4	-	549	656	caatttgatatTGCCAAAGGAGATTTGCCCTGaacgaagccaaagtttcggtcaggtttgttcactgccaaaggagatagatttgcctcgctaagtacaatcagacaa	45	mtr-MIR399i,mtr-MIR399h,mtr-MIR399c,mtr-MIR399l,mtr-MIR399p,gma-MIR399k,gma-MIR399j,gma-MIR399h,gma-MIR399b,gma-MIR399c,gma-MIR399i,gma-MIR399a,ptc-MIR399g,ptc-MIR399f,ptc-MIR399c,ath-MIR399a,ath-MIR399b,ath-MIR399c,mdm-MIR399b,mdm-MIR399i,mdm-MIR399j,mdm-MIR399c,mdm-MIR399a,gra-MIR399,aly-MIR399f,aly-MIR399b,aly-MIR399c,ppe-MIR399b,mes-MIR399a,mes-MIR399f,vvi-MIR399b,vvi-MIR399c,vvi-MIR399a,vvi-…	mtr-MIR399c	gttctgctgttgaggaatgatagggaaaatctcttttggcagagaggagtaaaaatcttaaacaggaatgtttctggttTGCCAAAGGAGATTTGCCCTGccatttttgacagctattg	mtr-miR399c	TGCCAAAGGAGATTTGCCCTG	5'	Yes	gp2b	...((((((..(((...(((((......(((((.((((((....)))))).)))))((((((..((.....))..)))))).....))).))..)))..))))))...	108	42.6	-25.2	0.5	18	43	48	0	0	5	21	10	0	0	6	0	22	0	36	0	12	0	6	6	0	5	0	0	0	13
66	57	rco-MIR403a-p5_1ss2TG	CGAGTTTGTGTGTGAATCTAA	21	TRINITY_DN26124_c0_g1	+	600	667	aagccactagtaaaCGAGTTTGTGTGTGAATCTAAtggaaacgagtttgtgtgtgaatctaatggaat	2	rco-MIR403a,rco-MIR403a,	rco-MIR403a	tctctagtttgtgtgtgaatctaattcaggccatccatgtcagggccctactaatcctatcccatggtgTTAGATTCACGCACAAACTCGtgatc	rco-MIR403a-p5	ctagtttgtgtgtgaatctaa	5'	New	gp2b	...(((.(((.......(((..(..(..(((....((....)).)))..)..)..)))))).)))...	68	36.8	-9.7	0.4	0	0	0	0	0	0	0	0	65	0	0	0	0	0	0	0	0	0	0	0	0	6	0	0	0	0
67	58	mtr-miR408-3p_L-2	GCACTGCCTCTTCCCTGGC	19	TRINITY_DN26662_c1_g5	-	104	139	aacagagatcaataataGCACTGCCTCTTCCCTAGC	28	mtr-MIR408,gma-MIR408a,gma-MIR408b,gma-MIR408d,gma-MIR408c,ptc-MIR408,ath-MIR408,mdm-MIR408a,mdm-MIR408b,mdm-MIR408d,stu-MIR408b,aly-MIR408,mes-MIR408,vvi-MIR408,nta-MIR408,csi-MIR408,lus-MIR408a,cme-MIR408,sly-MIR408,cas-MIR408,cpa-MIR408,rco-MIR408,cca-MIR408,hbr-MIR408b,hbr-MIR408a,ahy-MIR408,vun-MIR408,dpr-MIR408,	mtr-MIR408	tagttaatgacaggacaaagACAGGGAACATGCAGAGCATGgatgaaactatcgacagtgaaggaaactgttgtggctccactcATGCACTGCCTCTTCCCTGGCttataatctgtttttattat	mtr-miR408-3p	ATGCACTGCCTCTTCCCTGGC	3'	Diff	gp2b	...((((.................))))........	36	44.4	-1.1	0.1	24	7	28	41	38	37	0	0	0	0	0	5	0	0	0	0	0	0	6	0	0	0	0	0	22	15
68	59	mtr-miR408-3p_L-1R-1	TGCACTGCCTCTTCCCTGG	19	TRINITY_DN32565_c0_g9	-	121	146	TGCACTGCCTCTTCCCTGAgacatct	28	mtr-MIR408,gma-MIR408c,gma-MIR408d,gma-MIR408b,gma-MIR408a,ptc-MIR408,ath-MIR408,mdm-MIR408a,mdm-MIR408b,mdm-MIR408d,stu-MIR408b,aly-MIR408,mes-MIR408,vvi-MIR408,nta-MIR408,csi-MIR408,lus-MIR408a,cme-MIR408,sly-MIR408,cas-MIR408,cpa-MIR408,rco-MIR408,cca-MIR408,hbr-MIR408a,hbr-MIR408b,ahy-MIR408,vun-MIR408,dpr-MIR408,	mtr-MIR408	tagttaatgacaggacaaagACAGGGAACATGCAGAGCATGgatgaaactatcgacagtgaaggaaactgttgtggctccactcATGCACTGCCTCTTCCCTGGCttataatctgtttttattat	mtr-miR408-3p	ATGCACTGCCTCTTCCCTGGC	5'	Diff	gp2b	.....((.(((......))).))...	24	53.8	-3.1	0.2	47	58	65.5	144	117	134.5	0	3	0	18.5	9.5	72.5	4	3	18	0	37	9	68.5	3	0	5	3	0	174.5	129
69	59	mtr-miR408-3p_L-1R-1	TGCACTGCCTCTTCCCTGG	19	TRINITY_DN42770_c0_g2	-	420	443	TGCACTGCATCTTCCCTGGtgata	29	mtr-MIR408,gma-MIR408c,gma-MIR408a,gma-MIR408b,gma-MIR408d,ptc-MIR408,ath-MIR408,mdm-MIR408a,mdm-MIR408b,mdm-MIR408d,stu-MIR408b,stu-MIR408a,aly-MIR408,mes-MIR408,vvi-MIR408,nta-MIR408,csi-MIR408,lus-MIR408a,cme-MIR408,sly-MIR408,cas-MIR408,cpa-MIR408,rco-MIR408,cca-MIR408,hbr-MIR408a,hbr-MIR408b,ahy-MIR408,vun-MIR408,dpr-MIR408,	mtr-MIR408	tagttaatgacaggacaaagACAGGGAACATGCAGAGCATGgatgaaactatcgacagtgaaggaaactgttgtggctccactcATGCACTGCCTCTTCCCTGGCttataatctgtttttattat	mtr-miR408-3p	ATGCACTGCCTCTTCCCTGGC	5'	Diff	gp2b	.......((((......))))...	24	50	-2.9	0.2	47	58	65.5	144	117	134.5	0	3	0	18.5	9.5	72.5	4	3	18	0	37	9	68.5	3	0	5	3	0	174.5	129
70	60	ahy-MIR408-p5_2ss1CG18TG	GATTGACGCTCATGCACG	18	TRINITY_DN34362_c0_g1	+	225	259	TATTGACGCTCATGCACGaaagcgtggggagcaaa	1	ahy-MIR408,	ahy-MIR408	gaagaagagatgacaaagaaCTGGGAACAGGCAGAGCATGAatggaactatcaatagacacattttgttcattgacgctcATGCACTGCCTCTTCCCTGGCtctctctttctttttccttct	ahy-MIR408-p5	cattgacgctcATGCACT	5'	New	gp2b	.......((((...((((....))))..))))...	35	51.4	-10.8	0.6	0	0	0	0	0	0	9	8	38	0	54	8	0	0	0	0	10	0	0	154	0	0	0	0	0	0
71	61	mtr-miR408-3p_L-1R-2	TGCACTGCCTCTTCCCTG	18	TRINITY_DN38294_c0_g5	-	95	139	actaggcatacaagggttactgcaatTGCACTGCCTCTTCCCTCa	28	mtr-MIR408,gma-MIR408b,gma-MIR408d,gma-MIR408a,gma-MIR408c,ptc-MIR408,ath-MIR408,mdm-MIR408b,mdm-MIR408d,mdm-MIR408a,stu-MIR408b,aly-MIR408,mes-MIR408,vvi-MIR408,nta-MIR408,csi-MIR408,lus-MIR408a,cme-MIR408,sly-MIR408,cas-MIR408,cpa-MIR408,rco-MIR408,cca-MIR408,hbr-MIR408b,hbr-MIR408a,ahy-MIR408,vun-MIR408,dpr-MIR408,	mtr-MIR408	tagttaatgacaggacaaagACAGGGAACATGCAGAGCATGgatgaaactatcgacagtgaaggaaactgttgtggctccactcATGCACTGCCTCTTCCCTGGCttataatctgtttttattat	mtr-miR408-3p	ATGCACTGCCTCTTCCCTGGC	3'	Diff	gp2b	...(((((..(((..((....))..)))...))))).........	45	48.9	-8.8	0.4	0	0	0	26	19	21	0	0	6	0	0	11.5	0	0	2.5	0	3	0	7	0	0	0	0	0	16	5.5
72	62	mtr-MIR408-p3_1ss13CT	GCACTGCCTCTTTCCTGGCT	20	TRINITY_DN39576_c2_g2	-	530	563	gagagagagagagaGCACTGCCTCTATCCTGGCT	26	mtr-MIR408,gma-MIR408a,gma-MIR408b,gma-MIR408d,gma-MIR408c,ptc-MIR408,ath-MIR408,mdm-MIR408a,stu-MIR408b,aly-MIR408,mes-MIR408,vvi-MIR408,nta-MIR408,csi-MIR408,lus-MIR408a,cme-MIR408,sly-MIR408,cas-MIR408,cpa-MIR408,rco-MIR408,cca-MIR408,hbr-MIR408a,hbr-MIR408b,ahy-MIR408,vun-MIR408,dpr-MIR408,	mtr-MIR408	tagttaatgacaggacaaagACAGGGAACATGCAGAGCATGgatgaaactatcgacagtgaaggaaactgttgtggctccactcATGCACTGCCTCTTCCCTGGCttataatctgtttttattat	mtr-MIR408-p3	GCACTGCCTCTTCCCTGGCt	3'	New	gp2b	...((.((.((((.((...)))))).))))....	34	55.9	-6.8	0.4	26	30	33	25	28	23	0	0	0	0	0	0	0	0	0	0	0	0	0	0	0	0	0	0	5	11
73	63	ath-MIR472-p3_2ss6TG18AG	TTTCCGACTCCGCCCATGCCAT	22	TRINITY_DN41150_c0_g1	+	312	478	ttcggagaaaacggaaagggagctattgagctcttggaatcctgcgggatgggcgagacggtaagagagagagaggggtctctcaaagatcgatcaatcgattctcTTTCCGACTCCGCCCATGCCATtggatttcgattgctcctccctctcctcctctctccttt	3	ath-MIR472,aly-MIR472,cas-MIR472,	ath-MIR472	tctgtatgtatgtATGGTCGAAGTAGGCAAAATCtcacctttctagcagatcaacaatgaattttgtggaatagatgttggatttgtaaggttttggtgtttgcaagtgttgagatgcgcaagatttgagtaagaTTTTTCCTACTCCGCCCATACCatacatacacc	ath-MIR472-p3	TTTCCTACTCCGCCCATACCat	3'	New	gp2b	...(((((....(((.((((((.....((((..(((((((((...((.(((((((((.(((.(((((.((((((....))))))...((((((....))))))))))).))).)).))))))).))...)))))))))..)))))))))).))).....)))))...	167	52.1	-80.3	0.9	26368	51217	56613	35874	38348	44346	162570	168301	91309	55343	49449	100354	81924	115720	142717	42322	121247	25093	177151	39894	17535	79587	57388	42385	48412	60774
74	64	cme-MIR477a-p5_2ss19TA21AT	AAAGGCTTCCAATATTCTATT	21	TRINITY_DN37269_c0_g1	+	534	627	atcggaaaagttttcaactgttctcAAAGGCTTCCAATATTCTATTcgatataggcgattgggcctttgatggcaattgaatacttattcctct	3	mes-MIR477f,mes-MIR477g,cme-MIR477a,	cme-MIR477a	atggtttacaACCTCCCTCAAAGGCTTCCAAtattctttacattattattggaaatgatatacatgatgtagtgattgttgggagcccaacagggaggctgaaaagctt	cme-MIR477a-p5	AAAGGCTTCCAAtattcttta	5'	New	gp2b	...((((((((.(((((.(((..((((((((..(((((..(((((.....)))))..)))))))))))))..))).))))).)))).))))...	53	37.2	-35.8	1	3	6	6	0	0	0	51	46.5	55.5	43.5	17.5	40	55	105.5	70	37	38	5	109.5	29	16	74	40.5	31.5	8	29.5
75	64	cme-MIR477a-p5_2ss19TA21AT	AAAGGCTTCCAATATTCTATT	21	TRINITY_DN41358_c0_g2	+	252	304	ttttcAAAGGCTTCCAATATTCTATCcaatgtaggatcctgggcctttgatgg	3	mes-MIR477f,mes-MIR477g,cme-MIR477a,	cme-MIR477a	atggtttacaACCTCCCTCAAAGGCTTCCAAtattctttacattattattggaaatgatatacatgatgtagtgattgttgggagcccaacagggaggctgaaaagctt	cme-MIR477a-p5	AAAGGCTTCCAAtattcttta	5'	New	gp2b	...((((((((..(((..(((((((.....)))))))..)))))))))))...	53	41.5	-18.8	0.9	3	6	6	0	0	0	51	46.5	55.5	43.5	17.5	40	55	105.5	70	37	38	5	109.5	29	16	74	40.5	31.5	8	29.5
76	65	ptc-MIR481d-p3_2ss5AG18TC	GGTCGCGAGTTCGAATCCC	19	TRINITY_DN26018_c1_g1	+	1053	1108	cttgatttgagtggtgatcttcattatgatggagttGGCCGCGAGTTCGAATCCCt	2	ptc-MIR481d,ptc-MIR481c,	ptc-MIR481d	atcctAGGACCTCACCTAACAGCTTAAGCtattgggttgagatgattctttgacatggtatcagagccttgatgaccaagtggtcacgagttcgaatctcaccactcctatttatttgataaaaatcaagcacaaggtaatgtgggcctatgcaagtttcaagcccaaagagctttcacttgagggggtgtattag	ptc-MIR481d-p3	ggtcacgagttcgaatctc	3'	New	gp2b	...((((((((((((...((((((....))))))...)))))....)))))))...	56	46.4	-16.9	0.7	0	0	0	0	0	0	0	0	0	0	0	5	0	0	0	0	0	0	0	17	0	0	0	0	0	0
77	66	ghr-miR482b	TCTTGCCTACTCCACCCATGCC	22	TRINITY_DN29983_c0_g1	-	614	717	gtaggttgagcagcgatagaagaagaagaagcagcagcggcggtagtctgaagcttgttgttcaagttcttgaccagagtagTCTTGCCAACTCCACCCATGCC	1	ghr-MIR482b,	ghr-MIR482b	agagacgatggagaaggagcttaggattctagaaagctcgtgggatgggtgagggggtaagacaatggactgtttcagtcttttggaaacagaaataaagaagaaggctggtttatgTCTTGCCTACTCCACCCATGCCactggtttcctggtgttcctcctcctcctaaagtctct	ghr-miR482b	TCTTGCCTACTCCACCCATGCC	3'	Yes	gp2b	...(((((.((((.(((....(((.((.((((..((((.......).)))..)))).)).)))...((((.....))))..))))))))))))...........	104	51	-23.6	0.4	0	0	0	0	0	0	0	0	0	6	5	0	0	0	0	0	0	0	0	0	0	0	0	0	0	0
78	67	gma-miR482b-3p_1ss8TA	TCTTCCCAACACCTCCCATACC	22	TRINITY_DN42942_c0_g8	-	121	197	TCTTCCCAACACTTCCCATACCtggaaaatcgctccgaaaaccaccgaacgatgatcggaaaacagcttcggaaagc	5	gma-MIR482d,gma-MIR482b,gma-MIR482e,gso-MIR482a,gso-MIR482b,	gma-MIR482e	agacaaaattgggggaaggcatgggTATGGGGGGATTGGGAAGGAATatccataagcaaaatatgctattTCTTCCCTACACCTCCCATACCactgtttttcctctctttctccccc	gma-miR482b-3p	TCTTCCCTACACCTCCCATACC	5'	Diff	gp2b	............((((.......))))......((((((.....((((.......))))........))))))....	77	49.4	-11.4	0.3	0	0	0	0	0	0	34	35	23	47	21	0	0	0	0	0	0	0	0	0	0	0	0	0	0	0
79	68	ptc-MIR530a-p5	TGCATTTGCACCTGCACC	18	TRINITY_DN44192_c0_g2	+	170	188	TGCACTTGCACCTGCACCT	13	ptc-MIR530a,gra-MIR530a,gra-MIR530b,stu-MIR530,ppe-MIR530,mes-MIR530a,mes-MIR530b,csi-MIR530a,lus-MIR530a,lus-MIR530b,cme-MIR530a,sly-MIR530,htu-MIR530,	ptc-MIR530a	gccaacatgttgcctttatcTGCATTTGCACCTGCACCTTacttgtttctttcttttgtttttgactccaaaaccaaaagtaagtttgaaacattaaaacaagcttgaggtgcaggtgcaggtgcaggtgaatgccatgttggt	ptc-MIR530a-p5	TGCATTTGCACCTGCACC	5'	New	gp2b	((((........))))...	19	57.9	-2.2	0.2	14	10	11	6	0	0	6	0	0	0	0	0	0	5	0	0	0	0	13	5	0	13	14	0	122	68
79	69	ptc-miR530a_R-1	TGCATTTGCACCTGCACCT	19	TRINITY_DN44192_c0_g2	+	170	188	TGCACTTGCACCTGCACCT	13	ptc-MIR530a,gra-MIR530a,gra-MIR530b,stu-MIR530,ppe-MIR530,mes-MIR530a,mes-MIR530b,csi-MIR530a,lus-MIR530a,lus-MIR530b,cme-MIR530a,sly-MIR530,htu-MIR530,	ptc-MIR530a	gccaacatgttgcctttatcTGCATTTGCACCTGCACCTTacttgtttctttcttttgtttttgactccaaaaccaaaagtaagtttgaaacattaaaacaagcttgaggtgcaggtgcaggtgcaggtgaatgccatgttggt	ptc-miR530a	TGCATTTGCACCTGCACCTT	3'	Diff	gp2b	((((........))))...	19	57.9	-2.2	0.2	0	0	0	0	0	0	0	0	0	0	0	0	0	0	0	0	0	0	0	0	0	0	0	0	11	5
80	70	csi-MIR530a-p3_2ss7AG18TC	ACTCGAGAGCATGAAGGC	18	TRINITY_DN41036_c2_g1	+	277	309	gatcgttctctgcaACTCGAGAGCGTGAAGGCg	1	csi-MIR530a,	csi-MIR530a	atttatcTGCATTTGCACCTGCACCTTGctgtgctgttatctgggttgacgaggatcatcatgatgatcagcttcaaaactcgaaagcatgaAGGTGCAGCTGTATATGCAGGtgaatgcc	csi-MIR530a-p3	actcgaaagcatgaAGGT	3'	New	gp2b	...(((((((........)))))))........	33	57.6	-8.9	0.5	0	0	0	0	0	0	0	0	0	0	0	11	0	0	0	6	0	0	7	6	0	0	0	0	0	0
81	71	mdm-miR535a_1ss18AG	TGACAACGAGAGAGAGCGCGC	21	TRINITY_DN37924_c0_g1	-	63	141	gacttcttgtatttcttcgatttccatggtttgattgagaatcgaatgatgaatcagaTGAGAACGAGAGAGAGCGCGC	8	mdm-MIR535a,ppe-MIR535a,vvi-MIR535c,vvi-MIR535a,vvi-MIR535b,cpa-MIR535,rco-MIR535,aqc-MIR535,	mdm-MIR535a	gatgttgtgTGACAACGAGAGAGAGCACGCttgtcatcacgcatgaaaggatcatggttgtttacgggcgtgccctctcttgttgtcattcggtc	mdm-miR535a	TGACAACGAGAGAGAGCACGC	3'	Diff	gp2b	...(((((((.((((.((((((..(((..(((((((...)))))))..))))))).)).))))))))))).........	79	41.8	-17.2	0.5	10	19	11	0	17	14	0	0	0	0	0	0	0	0	0	0	0	0	0	0	0	8	12	0	0	0
82	72	ath-MIR778-p3_2ss6GC21TC	TTTGGCACATGTGCCTAGGGC	21	TRINITY_DN44234_c0_g7	-	296	340	tcagacacttccagacTTTGGCACATGCGCCTAGGGCatgtcggt	1	ath-MIR778,	ath-MIR778	ccgcctTGGCTTGGTTTATGTACACCGagtatgttcagctccatcctatacagattttgggacatgtgcctagggttgaggtttcatatatagaaagaactgaacaaactcggtgtacatagaccaaaccaaggcggt	ath-MIR778-p3	tttgggacatgtgcctagggt	3'	New	gp2b	...((((..(((.......(((......)))..)))..))))...	45	55.6	-9.6	0.4	0	0	0	0	0	0	11	12	0	11	8	10	21	0	13	7	23	0	23	5	10	0	0	0	0	0
83	73	gma-miR828a	TCTTGCTCAAATGAGTATTCCA	22	TRINITY_DN43163_c0_g1	-	52	86	ttaggcatgctaTCTTGCTCAAATGAGTGTTCCAt	15	gma-MIR828b,gma-MIR828a,ptc-MIR828a,ptc-MIR828b,ath-MIR828,mdm-MIR828b,mdm-MIR828a,aly-MIR828,ppe-MIR828,mes-MIR828b,mes-MIR828a,vvi-MIR828a,cme-MIR828,cas-MIR828,ssl-MIR828,	gma-MIR828a	ttgtaatgttTCTTGCTCAAATGAGTATTCCAaccacagtcacatttggcatgaatattgtgtgccactgtcctcaaaggatgagatgctcatttgaccaagcaatgttaaaa	gma-miR828a	TCTTGCTCAAATGAGTATTCCA	3'	Yes	gp2b	...((.(..((...((....))...))..).))..	35	40	-3.7	0.3	26	71	76	51	31	41	33	24	27	19	19	52	28	18	50	14	48	0	80	8	5	17	12	19	14	30
84	74	vvi-miR845a_L+1_2ss2TG20AT	CGAGCTCTGATACCAATTGTTA	22	TRINITY_DN37313_c1_g4	-	145	204	tctgggcactttcgggaaaaattgaatttttcgcaaccCGAGCTCTGATACCAATTGTTG	2	vvi-MIR845a,vvi-MIR845b,	vvi-MIR845b	tttcacttgattagttccttcatgagttatttcaagcaatctccaaatttccttagcagatttacattggcatattctattatattcattcctatccatagcacattgcaaagtaaaaacgactttagcatttaattgaaaatttcttctatcaagctcattccattcttgcttgagttttggaaccaaaactccatcaactaatttagtgggaaaagttgggccatcttcaatgacatcccatacatctaaatcagttgattgtaagtaccaagtcattctaactttccaatagggatagtcggttcccgtaaagaatggagctctatgttttgaacaattttcagtttgagatgagcttgatggaacaaccattttcctcttagatgattaagtctt…	vvi-miR845a	TAGCTCTGATACCAATTGATA	3'	Diff	gp2b	((.((((....(((((((((((...)))))).....))))))))).))............	60	43.3	-10.4	0.4	0	0	0	0	0	0	8	11	0	0	0	8	12	5	6	0	0	0	12	0	0	7	0	6	0	0
85	75	vvi-MIR845c-p5_2ss15AC19AT	AGGCTCTGATACCACTTGT	19	TRINITY_DN41942_c1_g1	+	495	525	ctCGGCTCTGATACCACTTGTtaggatcaac	3	vvi-MIR845d,vvi-MIR845e,vvi-MIR845c,	vvi-MIR845c	caattatgtgttttggttgtctgagtttcatgttggcaatttcttaatgattaaacatgAGGCTCTGATACCAATTGATGcataaaccat	vvi-MIR845c-p5	AGGCTCTGATACCAATTGA	5'	New	gp2b	...((..((((((.....))))))..))...	31	48.4	-5.5	0.4	4.5	7.5	6	4.5	5.5	4	0	0	16.5	9.5	0	3	4.5	19	0	3.5	6	0	0	0	0	7.5	4	0	0	2.5
86	76	ath-miR845a_R+3_2ss1CA19AT	AGGCTCTGATACCAATTGTTGGGA	24	TRINITY_DN45483_c0_g1	+	141	186	acgAGGCTCTGATACCAATTGTTGGGAtccgggatccccccaagac	5	ath-MIR845a,vvi-MIR845e,vvi-MIR845d,vvi-MIR845c,cas-MIR845,	ath-MIR845a	agataagggattgcacgatttctcaatagttccgtcgctgcgtttccatcacgtcgattgctgtcagagccacgcctatgaagaatttgtgCGGCTCTGATACCAATTGATGctatggaaacatcgatattgcctgattccgtgtttccttttaccttgttgt	ath-miR845a	CGGCTCTGATACCAATTGATG	5'	Diff	gp2b	....((........))..(((..((((((...))))))..)))...	46	56.5	-8.9	0.3	9.5	32.5	41	4.5	13.5	13	0	11	49.5	27.5	11	28	23.5	88	35	17.5	25	0	49	0	0	123.5	64	55	0	20.5
87	77	aly-MIR858-p5_2ss3CA18CG	TAAGTTATCGTTTATTTGA	19	TRINITY_DN38400_c0_g4	+	20	197	tgtctcaaagattaagccatgcatgtctaagtataagcaattatacagcgaaactgcgaatggctcattaaaTCAGTTATCGTTTATTTGAtagtaccttactacttggataaccgtggtaattctagagctaatacatgctaaaaatcccgacttcggaAGGGATGTATTTATTAGA	4	aly-MIR858,lus-MIR160b,cme-MIR160c,sly-MIR9471b,	aly-MIR858	agagtgattggattcgatgctaggcttgacaaagtgagcaatcttatgtgttctcatctttgTTTCGTTGTCTGTTCGACCTTggtctcgatctctccttaaaaccctaatacgttatcgtttatttcattcatctatccttcttatgatcatcatacatggtatcggtttatgattgatggggtagatagatgatcgaaacttttgatttctgaggctttttttttttttttaaacatttagtataccagatattactagtacacacatacatactgacacgatagtctatttgatgattaagtctttacgttcgtatacatacggatttccctttcttttgcataaaatcttagattatcgtaggcatgcggatttacaataagaaagatgattgtc…	aly-MIR858-p5	tacgttatcgtttatttca	5'	New	gp2b	...(((..(((....((((((..((((((((((((((..(((((..((((((((((..((((...))))....))))).)))))......)))))..)))).))))))))))..))))))...))).)))((((((.((((.....(((((..........))))))))).)))))).	178	35.4	-44.1	0.7	0	0	0	0	0	0	3.5	2.5	0	7	24	94.5	40.5	0	0	5	81	20	5	0	6.5	3.5	4.5	0	5	9.5
87	78	sly-MIR9471b-p3_2ss3AG17AG	AAGGATGTATTTATTAGA	18	TRINITY_DN38400_c0_g4	+	20	197	tgtctcaaagattaagccatgcatgtctaagtataagcaattatacagcgaaactgcgaatggctcattaaaTCAGTTATCGTTTATTTGAtagtaccttactacttggataaccgtggtaattctagagctaatacatgctaaaaatcccgacttcggaAGGGATGTATTTATTAGA	4	aly-MIR858,lus-MIR160b,cme-MIR160c,sly-MIR9471b,	sly-MIR9471b	gaaatgattttgtgaaaaaaaattggatctttgactgatttggggttttgagattcagttgatttctGAGGTGCTCACTCAGCTAATAgttattgtttaagaaactcaataatattggcagcaaggagaatggtgactttcaggatgataactaTTGGCTGAGTGAGCATCACTGaaatcgacatgattctgagaggaaaatgactgattgaaagatgtatttattaaaaaaattgtttt	sly-MIR9471b-p3	aaagatgtatttattaaa	3'	New	gp2b	...(((..(((....((((((..((((((((((((((..(((((..((((((((((..((((...))))....))))).)))))......)))))..)))).))))))))))..))))))...))).)))((((((.((((.....(((((..........))))))))).)))))).	178	35.4	-44.1	0.7	0	0	0	0	0	0	0	0	0	0	0	0	0	0	0	0	0	0	0	6	0	0	0	0	0	0
88	79	ssl-MIR948-p5_2ss15TC17TA	CTTCTTCTTCTTCTCCATCGC	21	TRINITY_DN32073_c0_g1	-	209	354	actctCTTCTTCTTCTTCTCCATCGCtcttccatcgtcctcctccttcttcttttcctcttctattttctgccattcttctgtgactctcttcttttttgccatttctaccttcttttctcttatacatggcttcgtctcgcccct	3	lus-MIR530b,ssl-MIR948,ssl-MIR948,	ssl-MIR948	TGTGGCTGTGTGGGTTCCGGttcggaatcggacgattcttcttcttcttcttcttcgccggattccgattggggttccaccggcttcaca	ssl-MIR948-p5	cttcttcttcttcttcttcgc	5'	New	gp2b	........................((..............................................(((......)))...............(((((.......................)))))........))....	146	43.2	-5.5	0.1	0	0	0	0	0	0	0	0	5	0	0	0	0	0	0	0	0	0	0	0	0	0	0	0	6	0
89	80	ptc-MIR1445-p3_2ss8CT17TG	TAAATCCTTTGTAGACGA	18	TRINITY_DN24907_c0_g1	+	184	317	taactataggtacacttttgtgtatccaacatcataaaattgcaacgcactcccaatgtcctcaaatatgacggaacgagagtatgctgaaacacaatttcaaatattggaaaagaTAAATCCTTTGTAGACGA	1	ptc-MIR1445,	ptc-MIR1445	aagctaattaatctgatttccctagtttataagttgttacaattgaatgaaccttgtttgcaagcataggattagttgccgcccaccataaaTCCCTTGTAGACTAGAAAAAtctaatctgatttggttt	ptc-MIR1445-p3	taaaTCCCTTGTAGACTA	3'	New	gp2b	...((((((((((((....)))))))....(((.......(((...)))...((((((((((((....))).)))..((((...((......))...))))...))))))....)))........)))))....	48	35.1	-20.9	0.4	0	0	0	0	0	0	0	0	0	0	0	0	0	0	0	0	0	0	0	2.5	19.5	0	0	0	0	0
90	80	ptc-MIR1445-p3_2ss8CT17TG	TAAATCCTTTGTAGACGA	18	TRINITY_DN30617_c0_g1	+	154	201	cacaagttcaaatattgggaaagaCAAATCCTTTGTAGACGActtaaa	1	ptc-MIR1445,	ptc-MIR1445	aagctaattaatctgatttccctagtttataagttgttacaattgaatgaaccttgtttgcaagcataggattagttgccgcccaccataaaTCCCTTGTAGACTAGAAAAAtctaatctgatttggttt	ptc-MIR1445-p3	taaaTCCCTTGTAGACTA	3'	New	gp2b	...(((((....(((.((((........))))..)))...)))))...	48	33.3	-6.3	0.4	0	0	0	0	0	0	0	0	0	0	0	0	0	0	0	0	0	0	0	2.5	19.5	0	0	0	0	0
91	81	gma-MIR1507c-p3_2ss9AT18TC	TCATTCCATACATCATCCAA	20	TRINITY_DN42736_c0_g1	-	171	200	ctagggttcTCGTTCCATACATCATCCAAa	1	gma-MIR1507c,	gma-MIR1507c	tgctaGAGGTGTTTGGGATGAGAGAAtagaattttttcaaatgcttgaaagtgatctcttcCCTCATTCCAAACATCATCTaacacacat	gma-MIR1507c-p3	TCATTCCAAACATCATCTaa	3'	New	gp2b	...(((.......)))..............	30	43.3	-3.9	0.3	0	0	0	0	0	0	0	0	0	0	0	0	0	0	0	0	0	0	0	0	0	3.5	0	0	2.5	0
92	82	gma-MIR1507c-p5_2ss9AT18TC	TCATTCCATACATCATCCAA	20	TRINITY_DN46018_c2_g3	-	238	304	TCATTCCATACATCGTCCAAgacaagtaaaaatctcttcccacgcagtttctcttggaggcgattca	5	gma-MIR1507c,stu-MIR482a,nta-MIR482a,nta-MIR482c,sly-MIR482a,	gma-MIR1507c	tgctaGAGGTGTTTGGGATGAGAGAAtagaattttttcaaatgcttgaaagtgatctcttcCCTCATTCCAAACATCATCTaacacacat	gma-MIR1507c-p5	TCATTCCAAACATCATCTaa	5'	New	gp2b	...........(((((((((((.(((.....................))).))))))..)))))...	67	43.3	-8.9	0.3	0	0	0	0	0	0	0	0	0	0	0	0	0	0	0	0	0	0	0	0	0	3.5	0	0	2.5	0
93	83	csi-miR1515a_1ss16AG	TCATTTTTGCGTGCAGTGATCC	22	TRINITY_DN30070_c3_g1	+	212	328	ccaagagagagggagacgaattcgtacgtatcaatcaatagctatggcagtggcttcacacttccaagtatctaatttgtaTCATTTTTGCGTGCAGTGATCCtctgattctctgct	2	csi-MIR1515a,csi-MIR1515b,	csi-MIR1515a	tcgatttgcaTCATTTTTGCGTGCAATGATCCcgaatttgctctcttactcaactttctttttaatttacaaatattcatgtttattggtttgaaaaatagaaaaaaaaattctaatttttgttaacggggatctggATCATTCACGCAAAAATGATTtgactcgtgagttggc	csi-miR1515a	TCATTTTTGCGTGCAATGATCC	3'	Diff	gp2b	...((((((..((((....(((.(((((((..((((((..(((.(((.((((......)))).)))))).......)))....)))..))))))))))....))))..))))))...	117	42.7	-27.7	0.6	673	1714	2055	821	644	1042	8452	5682	1252	2627	2472	5710	3580	1853	8401	1292	4481	461	9649	894	445	5464	3718	2960	1138	2032
94	84	gma-MIR1520d-p5_2ss2TA19TG	GATGTTTTCATTGATCAAG	19	TRINITY_DN26081_c0_g3	+	92	246	GATGTTTTCATTAATCAAGaacgaaggttaggggatcgaaaacgatcagataccgttgtagtcttaacagTAAACTATGCCGACTAGGGAtcgggcgatctcacttttatgtgtcgctcggcaccttacgagaaatcaaagtctttgggttctgg	2	gma-MIR1520d,peu-MIR2916,	gma-MIR1520d	atgatgactatcacatgtcatgttctgattggatgttaactctatgaaaaaacaaatacattgttgttttcattgatcaATCAGAACATGACACGTGACAAttatcatcca	gma-MIR1520d-p5	gttgttttcattgatcaAT	5'	New	gp2b	...((((((....(((...(((....)))....))).))))))..(((((.(((...(((((.(((....))))))))...((((.((..((((((((...(((......)))))))))))..))....((....))..))))....))))))))	45	43.9	-40.8	0.6	0	0	0	0	0	0	0	0	0	0	2.5	0	0	0	0	0	0	0	0	0	0	0	0	0	0	2.5
94	85	peu-MIR2916-p3_1ss15CT	TAAACGATGCCGACTAGGGA	20	TRINITY_DN26081_c0_g3	+	92	246	GATGTTTTCATTAATCAAGaacgaaggttaggggatcgaaaacgatcagataccgttgtagtcttaacagTAAACTATGCCGACTAGGGAtcgggcgatctcacttttatgtgtcgctcggcaccttacgagaaatcaaagtctttgggttctgg	2	gma-MIR1520d,peu-MIR2916,	peu-MIR2916	TGGGGACTCGAAGACGATCATATaccatcctagtctcaaccataaacgatgccgaccagggattggcggatgttgcttctaggagtccgcca	peu-MIR2916-p3	taaacgatgccgaccaggga	3'	New	gp2b	...((((((....(((...(((....)))....))).))))))..(((((.(((...(((((.(((....))))))))...((((.((..((((((((...(((......)))))))))))..))....((....))..))))....))))))))	155	43.9	-40.8	0.6	0	0	0	0	0	0	24.5	42	0	0	0	0	5.5	29	35	5.5	0	0	4.5	2.5	8	0	0	0	0	0
95	84	gma-MIR1520d-p5_2ss2TA19TG	GATGTTTTCATTGATCAAG	19	TRINITY_DN34980_c0_g3	+	442	486	GATGTTTTCATTGATCAAGaacgAAAGTTAGGGGATCGAAGatga	2	mtr-MIR2655g,gma-MIR1520d,	gma-MIR1520d	atgatgactatcacatgtcatgttctgattggatgttaactctatgaaaaaacaaatacattgttgttttcattgatcaATCAGAACATGACACGTGACAAttatcatcca	gma-MIR1520d-p5	gttgttttcattgatcaAT	5'	New	gp2b	.......((.((((((...(((....)))....)))))).))...	45	37.8	-11.7	0.7	0	0	0	0	0	0	0	0	0	0	2.5	0	0	0	0	0	0	0	0	0	0	0	0	0	0	2.5
95	86	mtr-MIR2655g-p3_2ss8AG18AG	AAAGTTAGGGGATCAAAG	18	TRINITY_DN34980_c0_g3	+	442	486	GATGTTTTCATTGATCAAGaacgAAAGTTAGGGGATCGAAGatga	2	mtr-MIR2655g,gma-MIR1520d,	mtr-MIR2655g	ctcataagtaataaaaagtcCGTTTAGGTCCCTTAACTTTAtttaaagtatcggtttagtcctttatgttaatttaattcaaaaaaacgttaagtttagggaccaaactaatactaattaaataagttaagggaccaaactaatactaattaaataagttaagagaccaaaatttaacgtatttttaattaaattaacagaagggaccaaactgttactttaaataaagttaagggatcaaaacggaccttttattacttaaggga	mtr-MIR2655g-p3	aaagttaagggatcaaaa	3'	New	gp2b	.......((.((((((...(((....)))....)))))).))...	45	37.8	-11.7	0.7	0	0	0	0	0	0	2.5	0	0	0	0	0	0	0	0	0	0	0	0	0	0	0	0	0	0	0
96	87	gma-miR2109-5p_R+1	TGCGAGTGTCTTCGCCTCTGA	21	TRINITY_DN37090_c1_g6	-	295	376	gaaggcctTGCGGGTGTCTTCGCCTCTGAagctcaagaacacatgataagtgcatcgaggcggcgtggaagaggaggccatt	2	gma-MIR2109,gso-MIR2109,	gma-MIR2109	ggTGCGAGTGTCTTCGCCTCTGagagagatactatgagatctcaagcctcGGAGGCGTAGATACTCACACC	gma-miR2109-5p	TGCGAGTGTCTTCGCCTCTG	5'	Diff	gp2b	...((((((.......((((((((((.((.((...................)).)))))))))...)))....))))))...	82	56.1	-24.2	0.5	0	0	0	0	0	0	8	9	0	11	10	0	0	0	0	0	0	0	0	0	0	0	0	0	0	0
97	88	mtr-miR2111a-5p_1ss21AT	TAATCTGCATCCTGAGGTTTT	21	TRINITY_DN45331_c0_g3	-	789	965	atatcagaccctctagttcataatcaagtgagggaatgtaacagTAATCTGCATCCTGAGGTTCTacaccagatgaaacatcatcactggtggaaagtccgagccacttctggcttaatccgctacttgtctcgcagattctcatcttttctggttgaggactaccgggactgaccc	46	mtr-MIR2111a,mtr-MIR2111b,mtr-MIR2111h,mtr-MIR2111g,mtr-MIR2111n,mtr-MIR2111o,mtr-MIR2111c,mtr-MIR2111m,mtr-MIR2111d,mtr-MIR2111k,mtr-MIR2111e,mtr-MIR2111i,mtr-MIR2111f,mtr-MIR2111j,gma-MIR2111a,gma-MIR2111d,gma-MIR2111c,gma-MIR2111f,gma-MIR2111b,gma-MIR2111e,ptc-MIR2111b,ptc-MIR2111a,ath-MIR2111b,ath-MIR2111a,mdm-MIR2111a,mdm-MIR2111b,lja-MIR2111,aly-MIR2111b,aly-MIR2111a,aly-MIR2111c,ppe-MIR211…	mtr-MIR2111j	ttattgggtaaggattagaTAATCTGCATCCTGAGGTTTAtaacaatattttagctgtctttaaccttagaatgcagattatcctttccttattgccaatgc	mtr-miR2111a-5p	TAATCTGCATCCTGAGGTTTA	5'	Diff	gp2b	...((((.(((..((((((..((((.((.((..(.(((....((.(((((((.......(((.....))).(((((....)))))..(((((((......((((((....))))))..)))))))........)))))))))))))..))))))))..))))))..))).))))...	177	46.3	-50.1	0.6	0	12	10	0	0	0	5	0	0	0	0	0	0	0	0	0	0	0	0	0	0	0	5	0	11	0
98	89	pvu-MIR2118-p5_2ss1GT18TC	TAATATTTCTCACTCTGC	18	TRINITY_DN42063_c1_g7	+	51	112	aTAATATTTCTCACTCTGCtgtgtacatatagctgttaccctttcaggtgacgaaatgtaaa	1	pvu-MIR2118,	pvu-MIR2118	aagagcttaaggaagtgatgggagatgggtgggttggtaaaacataagagaatgaatatttctcactctgttTTGCCGATTCCACCCATTCCTAtgatttcctttgcttcctctctttccactct	pvu-MIR2118-p5	gaatatttctcactctgt	5'	New	gp2b	...(((((((.......((((((....)))))).((((((......)))))))))))))...	62	35.5	-15.2	0.7	8	9	15.5	0	3	0	6.5	0	0	2.5	0	0	0	6	0	0	0	0	4	0	0	3	0	2.5	3.5	0
99	90	pvu-MIR2118-p3_2ss1GT18TC	TAATATTTCTCACTCTGC	18	TRINITY_DN46470_c2_g4	+	1	77	taaatgtttttgcctaactaacgattcatggttatttcgtgtcctttatactcttggtaTAATATTTCTCACTCTGC	1	pvu-MIR2118,	pvu-MIR2118	aagagcttaaggaagtgatgggagatgggtgggttggtaaaacataagagaatgaatatttctcactctgttTTGCCGATTCCACCCATTCCTAtgatttcctttgcttcctctctttccactct	pvu-MIR2118-p3	gaatatttctcactctgt	3'	New	gp2b	.(((((((..((((............(((((.....)))))..............)))).)))))))..........	77	32.5	-9.1	0.4	8	9	15.5	0	3	0	6.5	0	0	2.5	0	0	0	6	0	0	0	0	4	0	0	3	0	2.5	3.5	0
100	91	mtr-MIR2586a-p5_1ss10TC	AAGCACGGACACGGACACGGACAC	24	TRINITY_DN30669_c0_g2	+	217	272	ctatgAAGCACGGACACGGACACGGACACgcataCGGACACGGACACGGACACGGg	1	mtr-MIR2586a,	mtr-MIR2586a	atgacaacctatgaagcacggatacggacacggacaccggacacgacacagacacgccgacacaactaataatttgaaaatatcacattatctggtgtaattacaagtgtcggtgtcatgtcggtatcggacacgacacgtgtccgacactgggacacgcctaatcCGAGGAGTGTCCGTGCTTCATagatgacaa	mtr-MIR2586a-p5	aagcacggatacggacacggacac	5'	New	gp2b	..........((....((....((....((....))....))....))....))..	56	62.5	-6.4	0.2	0	6.5	4	0	0	0	4	9	0	0	0	4.5	0	7.5	0	0	0	0	7	0	0	19.5	26.5	16	3	6
100	92	mtr-MIR2586a-p3_2ss5TC20CG	CGGACACGGACACGGACACGG	21	TRINITY_DN30669_c0_g2	+	217	272	ctatgAAGCACGGACACGGACACGGACACgcataCGGACACGGACACGGACACGGg	1	mtr-MIR2586a,	mtr-MIR2586a	atgacaacctatgaagcacggatacggacacggacaccggacacgacacagacacgccgacacaactaataatttgaaaatatcacattatctggtgtaattacaagtgtcggtgtcatgtcggtatcggacacgacacgtgtccgacactgggacacgcctaatcCGAGGAGTGTCCGTGCTTCATagatgacaa	mtr-MIR2586a-p3	cggatacggacacggacaccg	3'	New	gp2b	..........((....((....((....((....))....))....))....))..	56	62.5	-6.4	0.2	0	0	0	0	0	0	0	0	0	0	0	0	0	0	0	0	0	0	0	0	0	0	2.5	0	0	0
101	93	mtr-MIR2586a-p5_1ss15TC	CTATGAAGCACGGACACGGACACG	24	TRINITY_DN36370_c1_g3	+	179	228	ggtgtggttcaCTATGAAGCACGGACACGGACACGGACACgggacacgtc	1	mtr-MIR2586a,	mtr-MIR2586a	atgacaacctatgaagcacggatacggacacggacaccggacacgacacagacacgccgacacaactaataatttgaaaatatcacattatctggtgtaattacaagtgtcggtgtcatgtcggtatcggacacgacacgtgtccgacactgggacacgcctaatcCGAGGAGTGTCCGTGCTTCATagatgacaa	mtr-MIR2586a-p5	ctatgaagcacggatacggacacg	5'	New	gp2b	..((((.(((.....))).))))...(((....((....)).....))).	50	60	-9.7	0.3	0	0	0	0	0	0	0	0	0	0	0	0	0	0	0	0	0	0	0	0	0	2.5	2.5	0	0	0
101	94	mtr-MIR2586a-p3_1ss10TC	AAGCACGGACACGGACACGGACAC	24	TRINITY_DN36370_c1_g3	+	179	228	ggtgtggttcaCTATGAAGCACGGACACGGACACGGACACgggacacgtc	1	mtr-MIR2586a,	mtr-MIR2586a	atgacaacctatgaagcacggatacggacacggacaccggacacgacacagacacgccgacacaactaataatttgaaaatatcacattatctggtgtaattacaagtgtcggtgtcatgtcggtatcggacacgacacgtgtccgacactgggacacgcctaatcCGAGGAGTGTCCGTGCTTCATagatgacaa	mtr-MIR2586a-p3	aagcacggatacggacacggacac	3'	New	gp2b	..((((.(((.....))).))))...(((....((....)).....))).	50	60	-9.7	0.3	0	6.5	4	0	0	0	4	9	0	0	0	4.5	0	7.5	0	0	0	0	7	0	0	19.5	26.5	16	3	6
102	95	mtr-MIR2586a-p3_2ss1CA22CG	ACGGACACGACACAGACACGCGGA	24	TRINITY_DN43963_c0_g2	+	522	602	ggaccgaaattaatgtagatctaagtagcacggacacggatacgagatacgacACGGACACGACACAGACACGCGGAcacg	1	mtr-MIR2586a,	mtr-MIR2586a	atgacaacctatgaagcacggatacggacacggacaccggacacgacacagacacgccgacacaactaataatttgaaaatatcacattatctggtgtaattacaagtgtcggtgtcatgtcggtatcggacacgacacgtgtccgacactgggacacgcctaatcCGAGGAGTGTCCGTGCTTCATagatgacaa	mtr-MIR2586a-p3	ccggacacgacacagacacgccga	3'	New	gp2b	...(((.......(((..((((..(((...((....))..))).))))...)))((....))...........))).....	81	51.9	-11.4	0.3	0	10	13.5	0	2.5	9.5	9	10	0	5	4.5	0	9	11.5	15.5	0	8.5	0	9	0	0	45	33	29.5	3	5
103	96	mtr-MIR2586a-p5_2ss1CA22CG	ACGGACACGACACAGACACGCGGA	24	TRINITY_DN44058_c0_g1	-	114	176	ACGGACACGACACAGACACGCGGAcacgcaatttttcaaaaaatgggggacacgacacgctgg	1	mtr-MIR2586a,	mtr-MIR2586a	atgacaacctatgaagcacggatacggacacggacaccggacacgacacagacacgccgacacaactaataatttgaaaatatcacattatctggtgtaattacaagtgtcggtgtcatgtcggtatcggacacgacacgtgtccgacactgggacacgcctaatcCGAGGAGTGTCCGTGCTTCATagatgacaa	mtr-MIR2586a-p5	ccggacacgacacagacacgccga	5'	New	gp2b	.((....))...(((....(((....)))..((..(((.....)))..)).........))).	63	54	-8.3	0.2	0	10	13.5	0	2.5	9.5	9	10	0	5	4.5	0	9	11.5	15.5	0	8.5	0	9	0	0	45	33	29.5	3	5
104	97	mtr-MIR2590d-p5_1ss5CG	TCAGGCTGGTCGGAAATCA	19	TRINITY_DN37907_c0_g1	+	1	55	cTCAGGCTGGTCGGAAATCAgccgtcgagtgcaatggcataagcccgcctgactg	1	mtr-MIR2590d,	mtr-MIR2590d	caagaaaatttcaAGAATGACATGGCAGAATAATCACccttagattttatcaagaaatagtcttgaaactaatgttagccaataaaatctcagcctggtcggaaatcatgggtggtgggtgttatgtatttttttttatgaaagattaataaatgagactgaaATCTAAAGGTGATTATTGTGCCatgtcattcttgaatcttt	mtr-MIR2590d-p5	tcagcctggtcggaaatca	5'	New	gp2b	.((((((.((((((.......)))....((((....))))..))).))))))...	55	60	-19	0.6	0	0	0	0	0	0	56	0	0	0	0	0	0	51	0	0	0	0	0	0	0	0	0	0	0	0
105	98	mtr-MIR2592ay-p5_2ss6AG17CG_1	GAGTCGGGTTGTTTGGGA	18	TRINITY_DN37915_c0_g4	+	241	365	GAGTCGGGTTGTTTGGGAatgcagccctaatcgggcggtaaattccgtccaaggctaaatacgggcgagagaccgatagcaaacaagtaccgcgagggaaagatgaaAAGGACTTTGAAAAGAGA	2	mtr-MIR2592ay,ptc-MIR476a,	mtr-MIR2592ay	atcaaaagcttgattccgccagaagatcgtcattagttagggtaaggtgcattccaactgcaacaattgtcttacctctgaaatggggtaattcaaacttgccaaacggccaggactcaagcatttcgCTCGGCATTCATGTTTTTCCTTtgaaaagattaaattcttgttAGGCTGGTTTAGATGAAGGTAttaagtgtcaaggaatgaacctcatttcgttggcacttgaataccatcatctaaagcacacctaacaaaaatttattcttttcaaaggaaaacatgaatgccgggtgaaatgcttgagtcaggttgtttggcaagtttgaatttaccccattcaaaggtaagacaattgttgtagttggaatgcacattccaactgcaacaattatc…	mtr-MIR2592ay-p5	gagtcaggttgtttggca	5'	New	gp2b	.....(((((((........))))))).....((((((......))))))...((((....(((........))).)))).........((....))...............((((....)))).	55	49.6	-35.1	0.6	11	7	9	42	35	30.5	75	50	32.5	396	222.5	218	176	100.5	31	274.5	145.5	178	168	92.5	195.5	20.5	15.5	9.5	69	62
105	99	ptc-MIR476a-p3_2ss11CA17TG	AATGACTTTGAAAAGAGA	18	TRINITY_DN37915_c0_g4	+	241	365	GAGTCGGGTTGTTTGGGAatgcagccctaatcgggcggtaaattccgtccaaggctaaatacgggcgagagaccgatagcaaacaagtaccgcgagggaaagatgaaAAGGACTTTGAAAAGAGA	2	mtr-MIR2592ay,ptc-MIR476a,	ptc-MIR476a	ttaagcTAGTAATCCTTCTTTGCAAAGtcatttattatttttccttcaattactataatcaatgactttgcaaagatagatttactagctaaatct	ptc-MIR476a-p3	aatgactttgcaaagata	3'	New	gp2b	.....(((((((........))))))).....((((((......))))))...((((....(((........))).)))).........((....))...............((((....)))).	125	49.6	-35.1	0.6	0	0	0	0	0	0	0	0	0	0	0	0	6	0	0	0	0	0	0	0	0	0	0	0	0	0
106	98	mtr-MIR2592ay-p5_2ss6AG17CG_1	GAGTCGGGTTGTTTGGGA	18	TRINITY_DN30924_c0_g6	+	47	101	GAGTCGGGTTGTTTGGGAatgcagccttaactgcgaggtaaattccttgcaaagc	1	mtr-MIR2592ay,	mtr-MIR2592ay	atcaaaagcttgattccgccagaagatcgtcattagttagggtaaggtgcattccaactgcaacaattgtcttacctctgaaatggggtaattcaaacttgccaaacggccaggactcaagcatttcgCTCGGCATTCATGTTTTTCCTTtgaaaagattaaattcttgttAGGCTGGTTTAGATGAAGGTAttaagtgtcaaggaatgaacctcatttcgttggcacttgaataccatcatctaaagcacacctaacaaaaatttattcttttcaaaggaaaacatgaatgccgggtgaaatgcttgagtcaggttgtttggcaagtttgaatttaccccattcaaaggtaagacaattgttgtagttggaatgcacattccaactgcaacaattatc…	mtr-MIR2592ay-p5	gagtcaggttgtttggca	5'	New	gp2b	.....(((((((........)))))))....(((((((......)))))))....	55	49.1	-18.6	0.7	11	7	9	42	35	30.5	75	50	32.5	396	222.5	218	176	100.5	31	274.5	145.5	178	168	92.5	195.5	20.5	15.5	9.5	69	62
107	100	mtr-MIR2592ao-p5_2ss1AT18TC	TTTCCAACTGCAACAATC	18	TRINITY_DN29964_c2_g6	+	110	146	TTTCCAACTGCAACAATCttggccatgccaagataat	5	mtr-MIR2592ao,mtr-MIR2592bp,mtr-MIR2592as,mtr-MIR2592aq,mtr-MIR2592ay,	mtr-MIR2592ao	gtgcttggcaAAATGCTTGAGTCCTGTTGTTttcaagtttgaatttatctcattcaaaggtaacacaattgttgtggttgaaatgcacattccaactgcaacaattgtcttactctggatggggcaattcaaacttgccaatcagcaggaccccaatattcgatcagcatctt	mtr-MIR2592ao-p5	attccaactgcaacaatt	5'	New	gp2b	...............((((((((...))))))))...	37	40.5	-10.1	0.7	0	0	0	0	0	7	0	0	6	0	0	0	0	8	0	0	0	5	0	6	0	0	0	0	0	0
108	101	mtr-MIR2592ay-p5_2ss6AG17CG_2	GAGTCGGGTTGTTTGGGAA	19	TRINITY_DN39149_c0_g5	+	108	137	GAGTCGGGTTGTTTGGGAAtgcaaccttaa	1	mtr-MIR2592ay,	mtr-MIR2592ay	atcaaaagcttgattccgccagaagatcgtcattagttagggtaaggtgcattccaactgcaacaattgtcttacctctgaaatggggtaattcaaacttgccaaacggccaggactcaagcatttcgCTCGGCATTCATGTTTTTCCTTtgaaaagattaaattcttgttAGGCTGGTTTAGATGAAGGTAttaagtgtcaaggaatgaacctcatttcgttggcacttgaataccatcatctaaagcacacctaacaaaaatttattcttttcaaaggaaaacatgaatgccgggtgaaatgcttgagtcaggttgtttggcaagtttgaatttaccccattcaaaggtaagacaattgttgtagttggaatgcacattccaactgcaacaattatc…	mtr-MIR2592ay-p5	gagtcaggttgtttggcaa	5'	New	gp2b	.....(((((((........)))))))...	30	46.7	-8.4	0.6	11	7	9	42	35	30.5	75	50	32.5	396	222.5	218	176	100.5	31	274.5	145.5	178	168	92.5	195.5	20.5	15.5	9.5	69	62
109	102	mtr-MIR2592bi-p5_2ss8TC19AT	ATTCCCACTGTCCCTGTCTA	20	TRINITY_DN42273_c0_g1	+	4	144	gATTCCCACTGTCCCTATCTActatctagcgaaaccacagccaagggaacgggcttggcagaatcagcggggaaagaagaccctgttgagcttgactctagtttgacattgtgaaaagacatagagggtgtagaataagtg	2	mtr-MIR2592bi,mtr-MIR2592bj,	mtr-MIR2592bi	ccaatattcgacccgcattcccattgtccctgtcaaaagattaaattcttgttagtccggtttaaatgaaggtattgaagtgtcaaggaatgaacctcattcttttcacacttaaataccgtcatttaaaccaaacctaacaagaatttaatcttttgaaTGGAACATTGGGAATGCCGGTcgtatattgg	mtr-MIR2592bi-p5	attcccattgtccctgtcaa	5'	New	gp2b	......((((.......(((((..((.(((.........((((((........))))))....(((((((((........)))))))))))).))(((((((((............)))).)))))...)))))...))))	141	47.5	-38.8	0.6	67	76	97	373	324	367	595	429	2235	1586	921	961	601	516	254	951	535	481	860	685	935	153	120	80	405	343
110	103	mtr-MIR2602b-p5_2ss7AT18AG	GTCATCTAATTAGTGACG	18	TRINITY_DN45653_c0_g2	+	386	458	taaggtagccaaatgcctcGTCATCTAATTAGTGACGtgcatgaatggatcaacgaggttcttactgtcccta	2	mtr-MIR2602b,mtr-MIR2602a,	mtr-MIR2602b	actgccacgtcactaattcgatgacgtggcaatcactaccacacatgaaattccaattttgcccttaagaagaggacaaatattgaagaaagaattggaaactcaggggtaaaattggaatttcatgtaTGGCAGTGATTGCCACGTCATcaaattagtgacatgccag	mtr-MIR2602b-p5	GTCATcaaattagtgaca	5'	New	gp2b	...(((((......(((((((.(((((.(((((.....)).))).)))))..))))))).....))).))...	73	43.8	-17.3	0.5	0	0	0	0	0	0	0	0	0	6	0	0	0	0	0	9	0	0	0	0	0	0	0	0	0	0
111	104	mtr-MIR2603-p3_2ss9AC17AC	GTCCCTGCCCTTTGTACA	18	TRINITY_DN23767_c0_g1	+	271	411	ttgcccgatagggttgggtaacctcctgaaactccgtcgtgatggggatagatcattgcaattattgatcttgaacgaggaattcctagtaggcgcgagtcatcaactcgcgccgattacGTCCCTGCCCTTTGTACAcac	1	mtr-MIR2603,	mtr-MIR2603	ttggtccctgcacttttttgTTTGGTATTGGTCCCTGCACTTtgtaaaaatattggtattggttcctctgttaactttctgttaaaaaaaaaacacaaaaccaacggagtgcggcccaatcatttcacgcccacgtggcaccaatatcaatatttttacaaattgcagggacaaataccaatattttacaaagtgcagggcccaataccaatagttttgggttttttttttacagaaagttaatagagggaccaataccaatatttttacaaagtgcaaggaccaattccaaacaaaaaaaagtgtagggaccaat	mtr-MIR2603-p3	GTCCCTGCACTTtgtaaa	3'	New	gp2b	.((..(((.((((..(((...((((......((((((....))))))..((((((..........)))))).....))))......((((.(((((((((.....))))))))).))))...)))..)))))))..))...	119	50.4	-49.6	0.7	4	3	4	8.5	13	11	34.5	22	72	151.5	76.5	74.5	68.5	41.5	15	102	54	102.5	67.5	48	120.5	12.5	8	7.5	19	10.5
112	104	mtr-MIR2603-p3_2ss9AC17AC	GTCCCTGCCCTTTGTACA	18	TRINITY_DN24421_c0_g5	+	293	411	cctgtgaggctgcatcgtgctggggatcgagcactggaactgtgctcgtgaacatggaatgccttgtaatcgtgagtcatcaactcacgatgaatacGTCCCTGCCCTTTGTACAcacc	1	mtr-MIR2603,	mtr-MIR2603	ttggtccctgcacttttttgTTTGGTATTGGTCCCTGCACTTtgtaaaaatattggtattggttcctctgttaactttctgttaaaaaaaaaacacaaaaccaacggagtgcggcccaatcatttcacgcccacgtggcaccaatatcaatatttttacaaattgcagggacaaataccaatattttacaaagtgcagggcccaataccaatagttttgggttttttttttacagaaagttaatagagggaccaataccaatatttttacaaagtgcaaggaccaattccaaacaaaaaaaagtgtagggaccaat	mtr-MIR2603-p3	GTCCCTGCACTTtgtaaa	3'	New	gp2b	..((((....((((....((.(((((((((((((.......)))))))...(((.((....)).))).(((((((((.....)))))))))......))))))))....))))))))..	119	52.9	-39.8	0.6	4	3	4	8.5	13	11	34.5	22	72	151.5	76.5	74.5	68.5	41.5	15	102	54	102.5	67.5	48	120.5	12.5	8	7.5	19	10.5
113	105	mtr-MIR2606a-p3_2ss7TA17TC	AACACCAAAGGAATTGCACC	20	TRINITY_DN34954_c0_g2	-	19	147	gaactctagtttccaccgtctcagttgatctcctaggaactcattacaaacacagtcaggtaactattccagaccgattgaagtcgttcgggcacgacaAACACCAAAGGAATTGCACCtttagaggat	1	mtr-MIR2606a,	mtr-MIR2606a	cgattaggagaaaacttaggTACAATTCCTTAGGTGCTTTTcgtatggttcttaattaaaaatacatattttttggatataacaaactttgagaaaattatggatctgagaaaatcatggtaaatttagttaagaaccatacgaaaaacacctaaggaattgtacctaagttttctgcatttgatta	mtr-MIR2606a-p3	aacacctaaggaattgtacc	3'	New	gp2b	...(((((((((((......(((((((.(((....((((....((((............))))...))))))).))))))).(((((......)))))..........))))..)).....)))))...	129	45	-23.6	0.4	0	5	0	0	0	0	0	0	0	0	0	0	0	0	0	0	0	0	0	0	0	0	0	0	0	0
114	106	mtr-MIR2606a-p5_2ss7TA17TC	AACACCAAAGGAATTGCACC	20	TRINITY_DN42411_c0_g1	-	150	261	AACACCAAAGGAATTGCACCtttagaggattttaggtctcctagaccacgaaagtcgtttgggcatgacaaacaccaaaggacttgcacctttagaggatttaagttctcct	2	mtr-MIR2606a,mtr-MIR2606a,	mtr-MIR2606a	cgattaggagaaaacttaggTACAATTCCTTAGGTGCTTTTcgtatggttcttaattaaaaatacatattttttggatataacaaactttgagaaaattatggatctgagaaaatcatggtaaatttagttaagaaccatacgaaaaacacctaaggaattgtacctaagttttctgcatttgatta	mtr-MIR2606a-p5	aacacctaaggaattgtacc	5'	New	gp2b	.........((((((...((((((((((......((((.....))))....(((((.(((((............))))).)))))...)))))))))).....))))))...	112	42.9	-34.9	0.7	0	5	0	0	0	0	0	0	0	0	0	0	0	0	0	0	0	0	0	0	0	0	0	0	0	0
115	107	mtr-MIR2608-p3_2ss15CA19AT	CTCTCTCTCTCTCTATCTTTTA	22	TRINITY_DN34871_c0_g2	+	16	115	accagagaacccaaactcaacccgaaacagtcaatcaaacgactcagattgattctctctctctctctctctctctctCTCTCTCTCTCTCTCTCTTTTA	1	mtr-MIR2608,	mtr-MIR2608	attgcaaagagaaatgatatttgtacaactattttctaacaactttttgacaactttctctctcagactcacattatcttcttattccctctcttcctttttctctctctctctctctctctattatttttgaccaatcaaaagagagaaaaccaaagttgtcatgaaagttgtaccaaagaGTTGTACATATATCACTACTCTattgcaaa	mtr-MIR2608-p3	ctctctctctctctctctatta	3'	New	gp2b	...(((((........((.....))...((((((((..........)))))))).....................................)))))....	100	44	-9.8	0.2	0	0	0	0	0	0	0	0	6	0	0	0	0	5	0	0	0	0	0	0	0	0	0	0	0	0
116	108	mtr-MIR2613-p3_1ss9TC	GGCGGCGGCGGTGGTGGT	18	TRINITY_DN34544_c0_g2	+	555	577	ttggcGGCGGCGGCGGTGGTGGT	2	mtr-MIR2613,mtr-MIR2613,	mtr-MIR2613	aatcgatctgagaagaaggttgattggcggcggtggtggtggtgtgaatacagttatgaggagaaaaatggttgtttttatcggaggatggtggtgaacggagatcagcgaCGGTCGCCGGTGGTCAATGGTcggaaagaagagcggtg	mtr-MIR2613-p3	ggcggcggtggtggtggt	3'	New	gp2b	...((.((....)).))......	18	78.3	-3.6	0.2	0	0	0	0	0	0	0	2.5	0	0	0	0	0	0	0	0	0	0	0	2.5	0	0	0	0	0	0
117	108	mtr-MIR2613-p3_1ss9TC	GGCGGCGGCGGTGGTGGT	18	TRINITY_DN37801_c0_g2	+	177	194	GGCGGCGGCGGTGGTGGT	1	mtr-MIR2613,	mtr-MIR2613	aatcgatctgagaagaaggttgattggcggcggtggtggtggtgtgaatacagttatgaggagaaaaatggttgtttttatcggaggatggtggtgaacggagatcagcgaCGGTCGCCGGTGGTCAATGGTcggaaagaagagcggtg	mtr-MIR2613-p3	ggcggcggtggtggtggt	3'	New	gp2b	.((....)).........	18	83.3	-1.1	0.1	0	0	0	0	0	0	0	2.5	0	0	0	0	0	0	0	0	0	0	0	2.5	0	0	0	0	0	0
118	109	mtr-MIR2629d-p5_2ss13TC18GA	CTGCCGAAGTTTCCCTCA	18	TRINITY_DN24407_c1_g1	+	59	168	CTGCCGAAGTTTCCCTCAggatagcagtaacgttttcagttttatgaggtaaagcgaatgattagaggccttggggttggaacaaccttaacctattctcaaactttaaa	4	mtr-MIR2629d,mtr-MIR2629f,mtr-MIR2629g,stu-MIR7986,	mtr-MIR2629d	ctcgatagtttactgccgaAGTTTTCCTCGGTAGTTAACTtccataattcggcagttaactgccgatgagcatttcggtaaattactaatatgac	mtr-MIR2629d-p5	ctgccgaAGTTTTCCTCG	5'	New	gp2b	.....(((((((.((((..((.(((......))).)).(((((((...))))))).........))))..((..(((((...)))))..)).........)))))))...	35	40.9	-20.4	0.5	0	0	0	0	0	2.5	0	0	0	0	0	0	0	0	0	0	0	0	0	0	0	6.5	2.5	5	31.5	20
119	109	mtr-MIR2629d-p5_2ss13TC18GA	CTGCCGAAGTTTCCCTCA	18	TRINITY_DN45076_c1_g2	+	245	279	CTGCCGAAATTTCCCTCAggatagcggagattcat	3	mtr-MIR2629d,mtr-MIR2629g,mtr-MIR2629f,	mtr-MIR2629d	ctcgatagtttactgccgaAGTTTTCCTCGGTAGTTAACTtccataattcggcagttaactgccgatgagcatttcggtaaattactaatatgac	mtr-MIR2629d-p5	ctgccgaAGTTTTCCTCG	5'	New	gp2b	((.(((.....(((....)))...)))))......	35	48.6	-6.4	0.4	0	0	0	0	0	2.5	0	0	0	0	0	0	0	0	0	0	0	0	0	0	0	6.5	2.5	5	31.5	20
120	110	mtr-MIR2655g-p5_2ss8AG18AG	AAAGTTAGGGGATCAAAG	18	TRINITY_DN26053_c1_g1	+	336	419	aaggacgttttcgttaatcaagaacgAAAGTTAGGGGATCGAAGACGATCAGAtaccgtcgtagtcttaaccataaacgatgcc	2	mtr-MIR2655g,peu-MIR2916,	mtr-MIR2655g	ctcataagtaataaaaagtcCGTTTAGGTCCCTTAACTTTAtttaaagtatcggtttagtcctttatgttaatttaattcaaaaaaacgttaagtttagggaccaaactaatactaattaaataagttaagggaccaaactaatactaattaaataagttaagagaccaaaatttaacgtatttttaattaaattaacagaagggaccaaactgttactttaaataaagttaagggatcaaaacggaccttttattacttaaggga	mtr-MIR2655g-p5	aaagttaagggatcaaaa	5'	New	gp2b	...((((((((((....((...(((....)))..))...)))))))).))......((((((..............))))))..	84	42.9	-20.6	0.6	0	0	0	0	0	0	2.5	0	0	0	0	0	0	0	0	0	0	0	0	0	0	0	0	0	0	0
120	111	peu-MIR2916-p3_2ss3AG18TG	GGGCTCGAAGACGATCAGA	19	TRINITY_DN26053_c1_g1	+	336	419	aaggacgttttcgttaatcaagaacgAAAGTTAGGGGATCGAAGACGATCAGAtaccgtcgtagtcttaaccataaacgatgcc	2	mtr-MIR2655g,peu-MIR2916,	peu-MIR2916	TGGGGACTCGAAGACGATCATATaccatcctagtctcaaccataaacgatgccgaccagggattggcggatgttgcttctaggagtccgcca	peu-MIR2916-p3	GGACTCGAAGACGATCATA	3'	New	gp2b	...((((((((((....((...(((....)))..))...)))))))).))......((((((..............))))))..	84	42.9	-20.6	0.6	77	96.5	130	414	397	448.5	1074	1035	1604	5222.5	3229	2736.5	3617.5	2241	733.5	3934.5	1386.5	2747	2567	1578	3753	679.5	538.5	297.5	962	788.5
121	112	mtr-MIR2655c-p3_2ss11TC18AT	TTTATTTGAACTAAATTT	18	TRINITY_DN45870_c3_g3	+	481	529	cccccaagatttttattaaatagaaTTTATTTGAACTAAATTTtggaat	1	mtr-MIR2655c,	mtr-MIR2655c	cccttaagtaataaaaggtcCGTTTAGGTCCCTTAACTTTAtttaaagtatcagtttgatcctttctgataatttaattaaaaaaacattaagtttagggaccaaactaatattaattaaataagttaagggagaaaactaataccaattaaataagataagagaccaaaatttaacttttatttgaattaaattaatagaaaggaccaaaccgacactttcactaaagttaagggagcaaaacggaccttttattacttatgga	mtr-MIR2655c-p3	tttatttgaattaaatta	3'	New	gp2b	...(((((((((...((((((((...))))))))...)))))))))...	49	22.4	-10.8	1	0	0	0	0	0	0	0	0	10	0	0	0	0	0	0	0	0	0	0	0	0	0	0	0	0	0
122	113	peu-MIR2916-p5	CCATAAACGATGCCGACCA	19	TRINITY_DN25806_c0_g7	+	3	44	caattgCCATAAACGATGCCGACCAAGGATgagaggtaaaaa	1	peu-MIR2916,	peu-MIR2916	TGGGGACTCGAAGACGATCATATaccatcctagtctcaaccataaacgatgccgaccagggattggcggatgttgcttctaggagtccgcca	peu-MIR2916-p5	ccataaacgatgccgacca	5'	New	gp2b	...(((((..........((......))......)))))...	142	42.9	-4.2	0.2	110.5	168	187	271	237.5	309.5	1320	1492	938.5	4899.5	3678	2470.5	3666	735	1032	3157	1688.5	1791	3230.5	1656.5	3659	1155	730	557	750	883
122	114	peu-MIR2916-p3_3	ACGATGCCGACCAGGGAT	18	TRINITY_DN25806_c0_g7	+	3	44	caattgCCATAAACGATGCCGACCAAGGATgagaggtaaaaa	1	peu-MIR2916,	peu-MIR2916	TGGGGACTCGAAGACGATCATATaccatcctagtctcaaccataaacgatgccgaccagggattggcggatgttgcttctaggagtccgcca	peu-MIR2916-p3	acgatgccgaccagggat	3'	New	gp2b	...(((((..........((......))......)))))...	42	42.9	-4.2	0.2	0	7	3.5	8.5	3	4.5	8.5	9.5	8.5	49.5	58	25.5	72.5	0	10	58	28	40.5	42	55.5	146.5	3	3	0	7.5	11
123	113	peu-MIR2916-p5	CCATAAACGATGCCGACCA	19	TRINITY_DN31900_c0_g2	+	1	142	taaCCATAAACTATGCCGACCAgagattgaaaaatgttttcaaaaaaaaatagcagaaaaaaaaaaataatcttcaaaaaaaaaaaaaaaaaaaaaaaaaatcctctacttgaagaagcctctgttttccttttgtcacatg	1	peu-MIR2916,	peu-MIR2916	TGGGGACTCGAAGACGATCATATaccatcctagtctcaaccataaacgatgccgaccagggattggcggatgttgcttctaggagtccgcca	peu-MIR2916-p5	ccataaacgatgccgacca	5'	New	gp2b	...........((((..(((.((((.(((((((...)))))))........((((((.............(((((((................................)))))))....))))))...)))).))).))))	142	25.4	-14.431	0.4	110.5	168	187	271	237.5	309.5	1320	1492	938.5	4899.5	3678	2470.5	3666	735	1032	3157	1688.5	1791	3230.5	1656.5	3659	1155	730	557	750	883
124	115	peu-miR2916_L-2R-3_1ss6AG	GGGGCTCGAAGACGATCA	18	TRINITY_DN29935_c0_g5	+	340	427	gGGGGATCGAAGACGATCAgataccgtcgtagtctctaccgTAAACTATGCCGACCAGGGAtccggagagtttgcatggatgactccc	1	peu-MIR2916,	peu-MIR2916	TGGGGACTCGAAGACGATCATATaccatcctagtctcaaccataaacgatgccgaccagggattggcggatgttgcttctaggagtccgcca	peu-miR2916	TGGGGACTCGAAGACGATCATAT	5'	Diff	gp2b	(((.(((((....)))))............((((((((..(((((((...(((..........)))..))))))).)))).)))))))	88	54.5	-26	0.5	110	106	149.5	325	284	322	706.5	831.5	2476.5	1697.5	1080.5	1187	1856	1498	387	1299	599	1158.5	1164.5	683	1479.5	438.5	373	223	670.5	579
124	116	peu-MIR2916-p3_4	TAAACGATGCCGACCAGGGA	20	TRINITY_DN29935_c0_g5	+	340	427	gGGGGATCGAAGACGATCAgataccgtcgtagtctctaccgTAAACTATGCCGACCAGGGAtccggagagtttgcatggatgactccc	1	peu-MIR2916,	peu-MIR2916	TGGGGACTCGAAGACGATCATATaccatcctagtctcaaccataaacgatgccgaccagggattggcggatgttgcttctaggagtccgcca	peu-MIR2916-p3	taaacgatgccgaccaggga	3'	New	gp2b	(((.(((((....)))))............((((((((..(((((((...(((..........)))..))))))).)))).)))))))	88	54.5	-26	0.5	0	7	3.5	8.5	3	4.5	8.5	9.5	8.5	49.5	58	25.5	72.5	0	10	58	28	40.5	42	55.5	146.5	3	3	0	7.5	11
125	117	peu-MIR2916-p5_2ss11TG17AG	AAGACGATCAGATACCGTCCTA	22	TRINITY_DN44486_c0_g1	+	366	423	cgAAGACGATCAGATACCGTCGTAgtcttAACCATAAACTATGCCGActagggatcgg	1	peu-MIR2916,	peu-MIR2916	TGGGGACTCGAAGACGATCATATaccatcctagtctcaaccataaacgatgccgaccagggattggcggatgttgcttctaggagtccgcca	peu-MIR2916-p5	AAGACGATCATATaccatccta	5'	New	gp2b	......(((((......((.((((((.(((....))))))))).))......))))).	58	48.3	-12.7	0.5	8	17.5	8.5	16.5	14.5	16	22.5	43.5	97.5	134	154	134.5	148.5	40.5	30	109.5	51	32.5	157	44.5	89	28	21	15.5	36	42.5
125	118	peu-MIR2916-p3_1	AACCATAAACGATGCCGA	18	TRINITY_DN44486_c0_g1	+	366	423	cgAAGACGATCAGATACCGTCGTAgtcttAACCATAAACTATGCCGActagggatcgg	1	peu-MIR2916,	peu-MIR2916	TGGGGACTCGAAGACGATCATATaccatcctagtctcaaccataaacgatgccgaccagggattggcggatgttgcttctaggagtccgcca	peu-MIR2916-p3	aaccataaacgatgccga	3'	New	gp2b	......(((((......((.((((((.(((....))))))))).))......))))).	58	48.3	-12.7	0.5	0	7	3.5	8.5	3	4.5	8.5	9.5	8.5	49.5	58	25.5	72.5	0	10	58	28	40.5	42	55.5	146.5	3	3	0	7.5	11
126	119	peu-MIR2916-p3_2ss2AG17TG	GGCTCGAAGACGATCAGATA	20	TRINITY_DN26081_c0_g2	+	409	473	caagaatgttttcattaatcaagaacgaaagtcagaGGTTCGAAGACGATCAGATAccgtcgtag	1	peu-MIR2916,	peu-MIR2916	TGGGGACTCGAAGACGATCATATaccatcctagtctcaaccataaacgatgccgaccagggattggcggatgttgcttctaggagtccgcca	peu-MIR2916-p3	GACTCGAAGACGATCATATa	3'	New	gp2b	...((..((((((...((((....((....))....)))).))))))..))..............	60	40	-8.9	0.3	16.5	25	16.5	139.5	110	141	373	277.5	186	1242.5	742.5	711.5	918	543	171.5	795.5	305	918	564	416	1103	162.5	99	64	430	369
127	119	peu-MIR2916-p3_2ss2AG17TG	GGCTCGAAGACGATCAGATA	20	TRINITY_DN26081_c0_g5	+	249	308	aaggatgttttctttaatcaagaacgaaagttgtgGGCTCGAAGATGATCAGATAccgtc	1	peu-MIR2916,	peu-MIR2916	TGGGGACTCGAAGACGATCATATaccatcctagtctcaaccataaacgatgccgaccagggattggcggatgttgcttctaggagtccgcca	peu-MIR2916-p3	GACTCGAAGACGATCATATa	3'	New	gp2b	...(((((((((.....(((..(((....))).)))....)))))).)))..........	60	40	-10.5	0.4	16.5	25	16.5	139.5	110	141	373	277.5	186	1242.5	742.5	711.5	918	543	171.5	795.5	305	918	564	416	1103	162.5	99	64	430	369
128	120	peu-MIR2916-p3_2ss12TG18AG	GAAGACGATCAGATACCGTCCT	22	TRINITY_DN26081_c0_g6	+	60	118	aatgttttcattaatcaagaacgaaagtttgaggttcGAAGACGATTAGATACCGTCCT	1	peu-MIR2916,	peu-MIR2916	TGGGGACTCGAAGACGATCATATaccatcctagtctcaaccataaacgatgccgaccagggattggcggatgttgcttctaggagtccgcca	peu-MIR2916-p3	GAAGACGATCATATaccatcct	3'	New	gp2b	..(((((((...((((..((((....))))..)))).)))))))...............	59	35.6	-12.5	0.6	0	0	0	0	0	0	0	10.5	4	4	10.5	11	11	6	4	8.5	0	0	13.5	2.5	2.5	4.5	0	2.5	0	0
129	121	aly-MIR4248c-p3_2ss8TC18AC	TTTTATTCTTGGCAATCC	18	TRINITY_DN40691_c1_g3	+	62	152	tcattgctcacataagtaggtagatttgtttcttgtcccgagatgttttgattttccttgcagtgtgttaggtTTTTATTCTTGGCAATCC	3	aly-MIR4248c,aly-MIR4248a,aly-MIR4248b,	aly-MIR4248c	tgtggtgatattaaaaatatACATTTTATTTTTGGCAATCAtttttcttttataaattcaaaaaagaaaatgtatattttgttatatataaccaacgtttgagttttaaaaaagataaatgaatttataagaaaatgattgccaaaaagaaaatgtatattttgttatattaccaaaa	aly-MIR4248c-p3	TTTTATTTTTGGCAATCA	3'	New	gp2b	..(((((((((((....(((.(((((....(((((...)))))......))))).)))....)))))..(((.......))).))))))..	91	37.4	-15.4	0.5	13	8	6	0	0	0	0	0	0	0	0	0	0	0	0	0	0	0	0	0	0	0	0	0	0	0
130	122	gma-MIR4379-p3_2ss17AG24GA	TCAACCCCAAAAGCTAGCTCAAGA	24	TRINITY_DN26866_c0_g3	+	134	213	ataggctagtcaaactaactaatgcatattgggtggtcttgggcctctcTCAACCCCAAAAGCTAGCTCAAGAggtgagg	2	gma-MIR4379,sly-MIR9469,	gma-MIR4379	tTAGAGTGTATACTGTGAGAGGCCTaactcaaccccaaaagctaactcaagggatgagggttgccccttatttatatattctaa	gma-MIR4379-p3	tcaaccccaaaagctaactcaagg	3'	New	gp2b	...(((((((...((((.(((((....))))).)))).(((((...........)))))..)))))))............	80	47.5	-17.4	0.5	0	0	0	0	0	0	0	0	0	0	0	0	0	0	0	0	0	0	0	0	0	38	22	25	0	0
131	123	ath-MIR5023-p5_2ss16TC17GC	TGCCTCCTTATCTTTCCC	18	TRINITY_DN44453_c1_g1	-	533	636	TGCCTCCTTATCTTTCCCtgatgcctcgggttgatcaaggtgtgggggcttgaaataccgcccacttctagtcatatggtccacctcctcgaggtaccaggtgt	1	ath-MIR5023,	ath-MIR5023	atgttgcatatcctttgccaattttgtaaATTGGTAGTGGATAAGGGGGCaaatttgatttttcaaatttgttagcagaatttgcctccttatcttttgccgattcacaaagttgccacttaaaaatgtaagcgt	ath-MIR5023-p5	tgcctccttatcttttgc	5'	New	gp2b	................((((.(((((((((.((((..((..(((((((.........)).)))))..)).))))...((....))..))))))))).))))...	104	53.8	-34.7	0.6	0	9	0	0	0	0	0	0	0	0	0	0	0	0	0	0	0	0	0	0	0	0	0	0	0	5
132	124	cas-MIR5139-p3_2ss9AG18GC	AAACTCTGGTGGAGGCTC	18	TRINITY_DN30754_c1_g1	+	143	171	gaagccaggggAAACTCTGGTGGAGGCTC	1	cas-MIR5139,	cas-MIR5139	gcacAAACCTGGCTCTGATACCAcataatacgaactccctaggatgaaactctgatggaggctgatgacaggtaagtggcgacgtgaattgatggtgatgatgcacaggtggattgc	cas-MIR5139-p3	aaactctgatggaggctg	3'	New	gp2b	...(((((((....)))))))........	29	62.1	-13.6	0.8	0	0	0	0	3	2.5	0	0	0	0	3	0	7	4	2.5	0	0	0	7	3.5	0	13	3.5	3.5	0	11.5
133	124	cas-MIR5139-p3_2ss9AG18GC	AAACTCTGGTGGAGGCTC	18	TRINITY_DN39149_c0_g8	+	139	167	gaagccagaggAAACTCTGGTGGAGGCTC	1	cas-MIR5139,	cas-MIR5139	gcacAAACCTGGCTCTGATACCAcataatacgaactccctaggatgaaactctgatggaggctgatgacaggtaagtggcgacgtgaattgatggtgatgatgcacaggtggattgc	cas-MIR5139-p3	aaactctgatggaggctg	3'	New	gp2b	...(((((((....)))))))........	29	58.6	-14.5	0.9	0	0	0	0	3	2.5	0	0	0	0	3	0	7	4	2.5	0	0	0	7	3.5	0	13	3.5	3.5	0	11.5
134	125	cas-miR5139	AAACCTGGCTCTGATACCA	19	TRINITY_DN31583_c0_g2	+	1	74	tgatcatatatgtataatttatttaatttatacttatattatgtgaataattAAACATGGCTCTGATACCAata	2	cas-MIR5139,rgl-MIR5139,	cas-MIR5139	gcacAAACCTGGCTCTGATACCAcataatacgaactccctaggatgaaactctgatggaggctgatgacaggtaagtggcgacgtgaattgatggtgatgatgcacaggtggattgc	cas-miR5139	AAACCTGGCTCTGATACCA	3'	Yes	gp2b	..((((..(((((.(((.(((((((....(((....)))....)))))))))).)))))....)))).......	74	18.9	-8.6	0.6	0	0	0	0	0	0	0	0	0	0	0	0	0	7	0	0	5	0	0	0	0	0	0	0	0	0
135	126	cas-MIR5139-p3_2ss10AG18TC	GAAACTCTGGTGGAGGCC	18	TRINITY_DN43087_c0_g2	+	410	437	gaagccagagGAAACTCTGGTGGAGGCC	1	cas-MIR5139,	cas-MIR5139	gcacAAACCTGGCTCTGATACCAcataatacgaactccctaggatgaaactctgatggaggctgatgacaggtaagtggcgacgtgaattgatggtgatgatgcacaggtggattgc	cas-MIR5139-p3	gaaactctgatggaggct	3'	New	gp2b	...(((((((....))))))).......	28	60.7	-14.5	0.9	0	0	0	0	0	0	17	49	45	25	74	27	34	13	22	33	47	10	36	17	9	0	0	0	0	0
136	127	mtr-MIR5229a-p5_2ss10TG17AG	AAGGGTTGGGCACGTTGG	18	TRINITY_DN45653_c0_g2	+	78	207	AAGGGTTGGGCACGTTGGgctttggaaggacgccttgggagcaggcagccactagccgggcaaccggccggcggcagccagcattcgggtgctgatgtccttagcaggcttcggccgtccggcgtgcggt	2	mtr-MIR5229a,mtr-MIR5229b,	mtr-MIR5229a	ctttttttgtTTAGCAGGAAGAGTGACTATGgaggctgacaaaagggttggtcacgttagtcactcttcctgttaaccaattaaataag	mtr-MIR5229a-p5	aagggttggtcacgttag	5'	New	gp2b	.........(((((..((((.....((((((((((.(....))))).(((.(..(((((....)))))..).)))...((((((....))))))..))))))....(((....)))))))..)))))...	130	67.7	-67	0.8	0	0	0	0	0	0	0	0	0	0	0	0	0	0	0	0	0	0	0	0	0	8	0	0	0	0
137	128	stu-MIR5303j-p3_2ss10GT17CT	ATTCAAATTTCTGCCCTA	18	TRINITY_DN25629_c0_g1	+	179	311	tgcggggagggatgtatttattaggtaaaaaaccaatgcgaggtagcaatatctcggtttttggtgaatcataataactgttcgaatcgcatggccttgcgctggcgatagttcATTCAAATTTCTGCCCTAt	1	stu-MIR5303j,	stu-MIR5303j	gctcggactattcaaattgctgccccaccctgtgtaagatcctccaaaaatgactacttttgaaggattaaacacgcatccggcAATATTTTTGAAGAGTCTGAGCAA	stu-MIR5303j-p3	attcaaattgctgcccca	3'	New	gp2b	...(((.((..((....(((((((((.....(((((..(((((((....)))))))....)))))..))).))))))......((((.((((.(((.......))).)).))..))))..))..)).)))...	133	42.1	-36.6	0.7	3.5	4	4.5	19.5	15.5	17.5	20.5	9	66.5	50.5	27.5	29.5	19.5	10.5	6.5	29.5	9	20.5	18	10.5	30	11	5	5	16	9.5
138	129	stu-MIR5303j-p5_2ss10GT17CT	ATTCAAATTTCTGCCCTA	18	TRINITY_DN38400_c0_g2	+	13	80	ATTCAAATTTCTGCCCTAtcaactttcgatggtagtatagaggactaccatggtggtaacgggtaacg	1	stu-MIR5303j,	stu-MIR5303j	gctcggactattcaaattgctgccccaccctgtgtaagatcctccaaaaatgactacttttgaaggattaaacacgcatccggcAATATTTTTGAAGAGTCTGAGCAA	stu-MIR5303j-p5	attcaaattgctgcccca	5'	New	gp2b	...........(((((((((.(((....((((((((.......)))))))))))))))..)))))...	68	42.6	-18.5	0.6	3.5	4	4.5	19.5	15.5	17.5	20.5	9	66.5	50.5	27.5	29.5	19.5	10.5	6.5	29.5	9	20.5	18	10.5	30	11	5	5	16	9.5
139	130	gma-MIR5368-p5_1ss6TC	CTGTTCCCTGGGATTGGCTTTG	22	TRINITY_DN30830_c0_g1	+	177	352	tttaCTGTTCCCTGGGATTGGCTTTGggcctttcctgcgcagcttaggtggagggcgaagaaggcccccttccgggggggcccgagccatcagtgagataccactctggaagagctagAATTCTAACCTTGTGTCAGGAcctacgggccaagggacagtctcaggtagacagtttc	1	gma-MIR5368,	gma-MIR5368	actgtttcctgggattggctttgggctttcctgcacagcttaggtggagggcaaagaagacttccttctgagggggccagagccatcagagagataccactctggacgagctagaattctaaccttgtgccaggacctatgggccgagGGACAGTCTCAGGTAGACAgt	gma-MIR5368-p5	ctgtttcctgggattggctttg	5'	New	gp2b	...((((((.((((((((((.((((((.((..((((((((((.(((((.....(((......((((((((....))))))))....(((..((((......)))).)))....))).....))))).).)))).))))).....)).))))))..))))))))))..))))))...	176	56.8	-76.2	0.8	32	31	68	187	133	164	0	0	43	23	16	6	48	0	0	15	5	0	5	6	6	5	0	0	18	23
139	131	gma-MIR5368-p3_1ss16CT	AATTCTAACCTTGTGTCAGGA	21	TRINITY_DN30830_c0_g1	+	177	352	tttaCTGTTCCCTGGGATTGGCTTTGggcctttcctgcgcagcttaggtggagggcgaagaaggcccccttccgggggggcccgagccatcagtgagataccactctggaagagctagAATTCTAACCTTGTGTCAGGAcctacgggccaagggacagtctcaggtagacagtttc	1	gma-MIR5368,	gma-MIR5368	actgtttcctgggattggctttgggctttcctgcacagcttaggtggagggcaaagaagacttccttctgagggggccagagccatcagagagataccactctggacgagctagaattctaaccttgtgccaggacctatgggccgagGGACAGTCTCAGGTAGACAgt	gma-MIR5368-p3	aattctaaccttgtgccagga	3'	New	gp2b	...((((((.((((((((((.((((((.((..((((((((((.(((((.....(((......((((((((....))))))))....(((..((((......)))).)))....))).....))))).).)))).))))).....)).))))))..))))))))))..))))))...	176	56.8	-76.2	0.8	1669	2421	3302	5325	4571	5740	517	240	474	505	184	334	414	358	115	134	107	90	200	116	123	1989	1254	814	930	1070
140	132	ath-MIR5645e-p3_2ss18TG20TG	AAAACGACGTCGTTTTGGGGC	21	TRINITY_DN23239_c1_g2	+	24	57	attcgccccAAAACGACGTCGTTTTGGGGCgccg	1	ath-MIR5645e,	ath-MIR5645e	taaatgacaaagtttatgttgacttttcATTTGAGTCATGTCGTTAAGtaggttaatataattatttcccggcgttaagttctcgtttatctcctctattagaacaaaacaacattgtttattgcatctcgttttgtctgttgaaacaaatttaaaccctaaatccccaaatcgatttcattatctgcgattttgaggtcaggtgggtttgtgattttgagataatgaaatcgatatagggatttaaggtttatatttgtttcaagagacaaaacgacgtcgttttgtgtcttcaataaacgacattgtttgttctaacagatcaaataaacaagtcattaaagccgtaaaaaaaattatattaacctatttaacgataggactcaaatggcaagtcaa…	ath-MIR5645e-p3	aaaacgacgtcgttttgtgtc	3'	New	gp2b	...((((((((((((....))))))))))))...	32	61.8	-22.1	1.1	3	8	14.5	3	2.5	3.5	0	0	0	0	0	0	0	0	4	0	0	0	0	0	0	7	5.5	4.5	0	0
141	132	ath-MIR5645e-p3_2ss18TG20TG	AAAACGACGTCGTTTTGGGGC	21	TRINITY_DN29131_c0_g2	+	34	65	gttgccccAAAACGACGTCGTTTTGGGGCgtt	1	ath-MIR5645e,	ath-MIR5645e	taaatgacaaagtttatgttgacttttcATTTGAGTCATGTCGTTAAGtaggttaatataattatttcccggcgttaagttctcgtttatctcctctattagaacaaaacaacattgtttattgcatctcgttttgtctgttgaaacaaatttaaaccctaaatccccaaatcgatttcattatctgcgattttgaggtcaggtgggtttgtgattttgagataatgaaatcgatatagggatttaaggtttatatttgtttcaagagacaaaacgacgtcgttttgtgtcttcaataaacgacattgtttgttctaacagatcaaataaacaagtcattaaagccgtaaaaaaaattatattaacctatttaacgataggactcaaatggcaagtcaa…	ath-MIR5645e-p3	aaaacgacgtcgttttgtgtc	3'	New	gp2b	..((((((((((((....))))))))))))..	32	56.2	-20.9	1.2	3	8	14.5	3	2.5	3.5	0	0	0	0	0	0	0	0	4	0	0	0	0	0	0	7	5.5	4.5	0	0
142	133	ath-MIR5658-p5_2ss1GC19AT	CATGATGATGATGATGAATCA	21	TRINITY_DN38029_c2_g3	+	405	437	CATGATGATGATGATGAATCAatcttcgtcgaa	1	ath-MIR5658,	ath-MIR5658	agATGATGATGATGATGATGAAAcagaatcagtaagaagcttcttcttcttaggaggaggaggaagattggtttcatcatcatcaccagttgaa	ath-MIR5658-p5	GATGATGATGATGATGAAAca	5'	New	gp2b	.....((((((.(((......))).))))))..	33	36.4	-7.7	0.6	0	0	0	0	0	0	0	0	0	0	0	0	7	0	0	0	0	0	5	0	0	0	0	0	0	0
143	134	hbr-MIR6173-p5_1ss14CT_2	GGATTAGATACCCTAGTAGT	20	TRINITY_DN23737_c0_g1	+	133	160	acaGGATTAGATACCCTGGTAGTCCAcg	1	hbr-MIR6173,	hbr-MIR6173	cgctgtgcgtatcgacccgtgcagtatccatcgtttaaagctaggggagcggaatgggattagataccccagtagtcctaAGCCGTAAACGATGGATACTgcacgggtcgatacggcacagcgctgtagctaacgcgtta	hbr-MIR6173-p5	ggattagataccccagtagt	5'	New	gp2b	...((((....(((....)))))))...	28	50	-5	0.4	0	0	0	0	0	0	0	0	0	16.5	4	10.5	0	3.5	0	3.5	3.5	3.5	4	0	0	0	0	0	0	0
143	135	hbr-MIR6173-p3_2ss13CT22TA	GATTAGATACCCTAGTAGTCCA	22	TRINITY_DN23737_c0_g1	+	133	160	acaGGATTAGATACCCTGGTAGTCCAcg	1	hbr-MIR6173,	hbr-MIR6173	cgctgtgcgtatcgacccgtgcagtatccatcgtttaaagctaggggagcggaatgggattagataccccagtagtcctaAGCCGTAAACGATGGATACTgcacgggtcgatacggcacagcgctgtagctaacgcgtta	hbr-MIR6173-p3	gattagataccccagtagtcct	3'	New	gp2b	...((((....(((....)))))))...	28	50	-5	0.4	0	0	0	0	0	0	0	0	3	2.5	0	3	3	0	0	0	0	0	0	0	0	0	0	0	0	0
144	136	hbr-MIR6173-p5_1ss14CT_1	GGATTAGATACCCTAGTA	18	TRINITY_DN34362_c0_g2	+	82	195	gagacgaaagctaggggagcgaatgGGATTAGATACCCCAGTAgtcctagccgtaaacgatggatactaggcgctgtgcgtatcgacccgtgcaGTGCTGTAGCTAACGCGTTA	1	hbr-MIR6173,	hbr-MIR6173	cgctgtgcgtatcgacccgtgcagtatccatcgtttaaagctaggggagcggaatgggattagataccccagtagtcctaAGCCGTAAACGATGGATACTgcacgggtcgatacggcacagcgctgtagctaacgcgtta	hbr-MIR6173-p5	ggattagataccccagta	5'	New	gp2b	..((((...(((((((..((....(((........)))..))..)))))))......((.(((.(((..(((((((..((........))..)))))))))).))).)))))).	114	53.5	-38.5	0.6	0	0	0	26	24.5	22.5	0	3	16.5	124.5	43	105	29	23	0	59.5	21.5	43.5	17.5	6	18	0	0	0	29	18.5
144	137	hbr-MIR6173-p3_1ss2CT	GTGCTGTAGCTAACGCGTTA	20	TRINITY_DN34362_c0_g2	+	82	195	gagacgaaagctaggggagcgaatgGGATTAGATACCCCAGTAgtcctagccgtaaacgatggatactaggcgctgtgcgtatcgacccgtgcaGTGCTGTAGCTAACGCGTTA	1	hbr-MIR6173,	hbr-MIR6173	cgctgtgcgtatcgacccgtgcagtatccatcgtttaaagctaggggagcggaatgggattagataccccagtagtcctaAGCCGTAAACGATGGATACTgcacgggtcgatacggcacagcgctgtagctaacgcgtta	hbr-MIR6173-p3	gcgctgtagctaacgcgtta	3'	New	gp2b	..((((...(((((((..((....(((........)))..))..)))))))......((.(((.(((..(((((((..((........))..)))))))))).))).)))))).	114	53.5	-38.5	0.6	18	10	34	588.5	512.5	563	0	5	8	185	60.5	36.5	75.5	37.5	0	51.5	5	59	49.5	22.5	76.5	20.5	11	0	42	35
145	138	hbr-MIR6173-p3_1ss14CT_1	GGATTAGATACCCTAGTA	18	TRINITY_DN22632_c0_g1	+	715	784	tctgggtccctaccgacgctggggtgcgaaagcatggggagcgaacaGGATTAGATACCCTAGTAgtcca	1	hbr-MIR6173,	hbr-MIR6173	cgctgtgcgtatcgacccgtgcagtatccatcgtttaaagctaggggagcggaatgggattagataccccagtagtcctaAGCCGTAAACGATGGATACTgcacgggtcgatacggcacagcgctgtagctaacgcgtta	hbr-MIR6173-p3	ggattagataccccagta	3'	New	gp2b	...((((..(((((..((((...((((....))))....))))....))..)))..))))..........	70	57.1	-20.3	0.5	0	0	0	26	24.5	22.5	0	3	16.5	124.5	43	105	29	23	0	59.5	21.5	43.5	17.5	6	18	0	0	0	29	18.5
146	139	hbr-miR6173_L-1R+1	GCCGTAAACGATGGATACTA	20	TRINITY_DN23149_c0_g1	+	394	487	ttagataccctggtagtccacGCCGTAAACGATGGATGCTAgccgtcggatagcttgctattcggtggcgcagctaacgcattaagcatcccgc	1	hbr-MIR6173,	hbr-MIR6173	cgctgtgcgtatcgacccgtgcagtatccatcgtttaaagctaggggagcggaatgggattagataccccagtagtcctaAGCCGTAAACGATGGATACTgcacgggtcgatacggcacagcgctgtagctaacgcgtta	hbr-miR6173	AGCCGTAAACGATGGATACT	5'	Diff	gp2b	...........(((.......))).........(((((((.(((..(((((((....)))))))..)))...((....))....)))))))...	94	54.3	-33.2	0.7	0	0	0	14	11	14.5	0	0	0	7	6.5	9	3	3.5	0	0	0	0	0	0	4	3.5	0	0	0	0
147	140	hbr-MIR6173-p3	GGATTAGATACCCCAGTA	18	TRINITY_DN23163_c0_g1	+	310	357	aaggccaggggagcaaacgGGATTAGATACCCCGGTAgtcctggcagt	1	hbr-MIR6173,	hbr-MIR6173	cgctgtgcgtatcgacccgtgcagtatccatcgtttaaagctaggggagcggaatgggattagataccccagtagtcctaAGCCGTAAACGATGGATACTgcacgggtcgatacggcacagcgctgtagctaacgcgtta	hbr-MIR6173-p3	ggattagataccccagta	3'	New	gp2b	...(((((((..((...((((.........))))))..)))))))...	48	58.3	-18.7	0.7	0	0	0	30	18	16	33.5	30.5	22.5	25.5	18	3	32	11	24.5	10	6	7.5	14	4	19.5	0	0	0	0	0
148	141	hbr-MIR6173-p3_2ss1TC17AG	CGGGATTAGATACCCCGGTA	20	TRINITY_DN23402_c0_g1	+	548	571	gaaCGGGATTAGAGACCCCGGTAg	1	hbr-MIR6173,	hbr-MIR6173	cgctgtgcgtatcgacccgtgcagtatccatcgtttaaagctaggggagcggaatgggattagataccccagtagtcctaAGCCGTAAACGATGGATACTgcacgggtcgatacggcacagcgctgtagctaacgcgtta	hbr-MIR6173-p3	tgggattagataccccagta	3'	New	gp2b	...((((.........))))....	24	58.3	-5.7	0.4	0	0	0	0	0	0	0	0	0	0	2.5	0	4	0	0	0	0	0	0	0	0	0	0	0	0	0
149	142	hbr-MIR6173-p3_2ss16GC17CG	TAAACGATGGATACTCGA	18	TRINITY_DN23556_c0_g1	+	286	357	ggctcgaaagcgtggggatcaaacaggattagataccctggtagtccacgcccTAAACGATGGATACTCGAc	1	hbr-MIR6173,	hbr-MIR6173	cgctgtgcgtatcgacccgtgcagtatccatcgtttaaagctaggggagcggaatgggattagataccccagtagtcctaAGCCGTAAACGATGGATACTgcacgggtcgatacggcacagcgctgtagctaacgcgtta	hbr-MIR6173-p3	TAAACGATGGATACTgca	3'	New	gp2b	...((((..(((((((.......((((.........))))....)))))))((........))....)))).	72	52.8	-18.1	0.5	0	0	0	0	0	0	0	0	2.5	0	0	2.5	9	0	0	0	0	0	0	21	0	0	0	0	0	0
150	143	hbr-miR6173_L-2R+1	CCGTAAACGATGGATACTA	19	TRINITY_DN24625_c1_g1	+	650	747	gattagataccctggtagtccacgCCGTAAACGATGGATACTTgttgttggaggtattgaccccttcagtgacgaagctaacgcgttaagtatcccgc	1	hbr-MIR6173,	hbr-MIR6173	cgctgtgcgtatcgacccgtgcagtatccatcgtttaaagctaggggagcggaatgggattagataccccagtagtcctaAGCCGTAAACGATGGATACTgcacgggtcgatacggcacagcgctgtagctaacgcgtta	hbr-miR6173	AGCCGTAAACGATGGATACT	5'	Diff	gp2b	.....(((((.......(((((((.......)).)))))..((((..(((((((........)))))))..)))).((....)).....)))))....	98	49	-26.8	0.6	0	0	0	18.5	24.5	24.5	0	0	0	11	4.5	9.5	5.5	0	0	4.5	0	6	5.5	2.5	4.5	0	0	0	7	0
151	144	hbr-MIR6173-p3_1ss13AG	ATTAGATACCCCGGTAGTCC	20	TRINITY_DN44076_c0_g1	+	195	242	aaagcgtggggagcaaaagggATTAGATACCCCTGTAGTCCacgccct	1	hbr-MIR6173,	hbr-MIR6173	cgctgtgcgtatcgacccgtgcagtatccatcgtttaaagctaggggagcggaatgggattagataccccagtagtcctaAGCCGTAAACGATGGATACTgcacgggtcgatacggcacagcgctgtagctaacgcgtta	hbr-MIR6173-p3	attagataccccagtagtcc	3'	New	gp2b	...(((((((..(((...(((........))).)))..)))))))...	48	54.2	-17.1	0.7	0	0	0	5.5	9	5.5	3	8	20.5	0	2.5	2.5	0	2.5	4.5	0	0	0	0	0	0	0	0	0	0	0
152	145	hbr-MIR6173-p3_1ss14CT_2	GGATTAGATACCCTAGTAG	19	TRINITY_DN46395_c1_g1	+	561	608	aaagcgtggggagcaaacaGGATTAGATACCCTGGTAGtccacgccgt	1	hbr-MIR6173,	hbr-MIR6173	cgctgtgcgtatcgacccgtgcagtatccatcgtttaaagctaggggagcggaatgggattagataccccagtagtcctaAGCCGTAAACGATGGATACTgcacgggtcgatacggcacagcgctgtagctaacgcgtta	hbr-MIR6173-p3	ggattagataccccagtag	3'	New	gp2b	...(((((((..((...((((.........))))))..)))))))...	48	54.2	-15.7	0.6	0	0	0	26	24.5	22.5	0	3	16.5	124.5	43	105	29	23	0	59.5	21.5	43.5	17.5	6	18	0	0	0	29	18.5
153	146	mdm-miR7122a_2ss4TA21CG	TTAAACAGAGAAATCACGGTGG	22	TRINITY_DN42308_c0_g1	-	230	283	tcctcgtccccatgatgacatcctttcaTTAAACAGAGAAATCACGGTCGaata	2	mdm-MIR7122a,mdm-MIR7122b,	mdm-MIR7122a	gggttcattccattcttTTATACAGAGAAATCACGGTCGagatcaaaactcagaagtctgtcagattctctctctccgtcgtctcaaccgtgtttttctgtataaagagatgtactggatcc	mdm-miR7122a	TTATACAGAGAAATCACGGTCG	3'	Diff	gp2b	...(((.((...((((((.......))))))....((....))..)).)))...	54	42.6	-9.9	0.4	379	753	870	306	294	365	3091	2285	454	2279	1965	3069	2092	1112	4058	1485	3455	367	4782	589	348	8180	5221	4245	674	998
154	147	ghr-MIR7499-p5_2ss10GC17CG	GGTTAATTCCGTTAACGA	18	TRINITY_DN25785_c0_g2	+	59	127	tcttagttggtggagtgatttgtctGGTTAATTCCGATAACGAACgagactccgtcctgctaactagtc	1	ghr-MIR7499,	ghr-MIR7499	aataaaaaacATATAATTTTCGGTTAATTCGGTTaaccaaccgaattaactgaaaaatatcggtttggttaag	ghr-MIR7499-p5	GGTTAATTCGGTTaacca	5'	New	gp2b	..((((((((..(..((....((((.(((.............))).))))..))..)..))))))))..	38	44.9	-19.2	0.6	4	0	5.5	13.5	11	13	25.5	11	0	131	145.5	101.5	60	0	17.5	200.5	60	101.5	114	55.5	156.5	8.5	0	3	19.5	10.5
154	148	ghr-MIR7499-p3_2ss10GC17CG	GGTTAATTCCGTTAACGAAC	20	TRINITY_DN25785_c0_g2	+	59	127	tcttagttggtggagtgatttgtctGGTTAATTCCGATAACGAACgagactccgtcctgctaactagtc	1	ghr-MIR7499,	ghr-MIR7499	aataaaaaacATATAATTTTCGGTTAATTCGGTTaaccaaccgaattaactgaaaaatatcggtttggttaag	ghr-MIR7499-p3	GGTTAATTCGGTTaaccaac	3'	New	gp2b	..((((((((..(..((....((((.(((.............))).))))..))..)..))))))))..	69	44.9	-19.2	0.6	4	0	5.5	7	6	2.5	17	7.5	0	39	59	43	19	0	11	71.5	28	18.5	52	18	44	8.5	0	3	4	5
155	147	ghr-MIR7499-p5_2ss10GC17CG	GGTTAATTCCGTTAACGA	18	TRINITY_DN23767_c0_g1	+	59	96	tctGGTTAATTCCGTTAACGAacgagaccttaacctgc	1	ghr-MIR7499,	ghr-MIR7499	aataaaaaacATATAATTTTCGGTTAATTCGGTTaaccaaccgaattaactgaaaaatatcggtttggttaag	ghr-MIR7499-p5	GGTTAATTCGGTTaacca	5'	New	gp2b	...((((((.((((((....)))).))..))))))...	38	44.7	-8.5	0.5	4	0	5.5	13.5	11	13	25.5	11	0	131	145.5	101.5	60	0	17.5	200.5	60	101.5	114	55.5	156.5	8.5	0	3	19.5	10.5
156	149	lja-MIR7531-p5_2ss11TC17CA	GAGGAAGAAACTTATAATA	19	TRINITY_DN38894_c2_g1	+	777	882	aaGAGGAAGAAACTTATAATAtcgtagccgctcatggttattttggccgattgatcttccaatatgctagtttcaacaactctcgttctttacatttcttcctatc	1	lja-MIR7531,	lja-MIR7531	aaggttagtctaaattcatgcatcggtttcCGTGTTTTCTTTCATTCCCCAtttcattcctcccaatcaaacataacattaattttcaaacatagcattaatgttatgtttagttggaagaacggaaagggagaaataaagaaaatacggaaattgaggaagaaatttatactaacctt	lja-MIR7531-p5	gaggaagaaatttatacta	5'	New	gp2b	...(((((((((...........(((((((....))))))).(((((..((((......))))..)))))........................)))))))))...	106	36.8	-21.6	0.6	0	0	0	72	79	89	0	0	0	0	0	0	0	0	0	0	0	0	0	0	0	0	0	0	0	7
157	150	stu-MIR8005c-p3	AGGGTTTAGGGTTTAGGGTT	20	TRINITY_DN26531_c1_g1	-	7	143	ttagggttttagggtttagagtttaggttttagggtttaggattttggggtttggggtttagggtttaggatttagggtttatttaaggtttatttagggtgggtttAGGGTTTAGGGTTTAGGGTTtagggtttgg	21	gra-MIR8674b,gra-MIR8674b,gra-MIR8674b,gra-MIR8674b,gra-MIR8674b,gra-MIR8674b,gra-MIR8674b,gra-MIR8674b,gra-MIR8674b,stu-MIR8005a,stu-MIR8005a,stu-MIR8005a,stu-MIR8005a,stu-MIR8005a,stu-MIR8005a,stu-MIR8005c,stu-MIR8005c,stu-MIR8005c,stu-MIR8005c,stu-MIR8005c,stu-MIR8005c,	stu-MIR8005c	ggtttagtgtttagaatttaggattaagggtttagggtttagggttagggttcaatgtttggagtttaggatataggatttagggtttaggatttagggtttagggattagagtttaggatttagagtttagggtttagagtttgcgtttaggttttagggtttaggcttttgtTTTAGAGTTTAAGGTTTAGAGTTT	stu-MIR8005c-p3	agggtttagggtttagggtt	3'	New	gp2b	...(..(..(((...(((((..(((..(..(((.......(((..(..(..((..(........)..))..)..)..)))...(((((.....))))).......)))..)..)))..)))))...)))..)..)..	137	38.7	-7.6	0.1	19	18.5	16.5	2.5	2.5	0	26.5	0	0	0	0	8	6	0	27.5	0	0	0	22	0	0	38.5	16.5	13.5	4	10.5
158	151	cpa-miR8155_R-1_1ss5CT	TAACTTGGCTCTGATACC	18	TRINITY_DN40611_c2_g2	+	8	115	gacggcgttagggtttctTAACTTGGCTCTGATACCatgtaagttttctgtatattcaacttgtatcaattacatcaagaccatagtttatataaccttaacgctaaa	2	ppe-MIR1511,cpa-MIR8155,	cpa-MIR8155	gatatcatcgggttctttgagggtatgttaattttctggtcccttaaTAACCTGGCTCTGATACCA	cpa-miR8155	TAACCTGGCTCTGATACCA	5'	Diff	gp2b	...((((((((((((....(((((((.(((......((((((.......(((((.......)))))...))))))..)))))).)))).....))))))))))))...	108	34.3	-27.9	0.8	0	7	8	0	0	0	0	0	0	0	0	0	0	0	0	0	0	0	0	0	0	0	0	0	0	0
159	152	gra-MIR8674b-p5_1ss10AG	TAGGGTTTAGGGTTTAGGGTT	21	TRINITY_DN25951_c1_g2	+	277	351	aaatcagttgaaattttggttTAGGGTTTAGGGTTTAGGGTTttcggtaccgatacaaaccgaatcgactgaaat	3	gra-MIR8674b,stu-MIR8005c,stu-MIR8005a,	gra-MIR8674b	atctttcctatcacattatccatggtctctttccaagtatttaatgacatatctgaatttttttccatgccattaacacataattttggtaagttgttccttcagccctaaatctagaaccttgaaccccaaatctgaacaccgaatccaaaccttgaacctcgaattttaaaccctaaactcaaacccaaaccctaaatcctaaaacttaagttcaaggtttagggttcaaatttggggctcaaggtttaggttcgaggttgaaggtttgggcttagggtttaaggtttagggttttgggttcaaggtttaagattcaagatttaagattcagagttgggggttctaggtttaaggttcaaggtaaaagaaaattataaaaattatgtgtcaatgaca…	gra-MIR8674b-p5	tagggtttaaggtttagggtt	5'	New	gp2b	...((((((((...((((((((...(((...(((...((....))...))))))..))))))))))))))))...	168	37.3	-17.8	0.6	44.5	22.5	22.5	7.5	2.5	4	44	3	0	0	0	8	5.5	0	29	0	0	0	22	0	0	43.5	21	10	4	10.5
160	152	gra-MIR8674b-p5_1ss10AG	TAGGGTTTAGGGTTTAGGGTT	21	TRINITY_DN26531_c1_g1	-	234	401	aggatttagggtttagggtttaggattTAGGGTTTAGGGTTTAGGGTTttagggttttagggtttagagtttaggttttagggtttaggattttggggtttggggtttagggtttaggatttagggtttatttaaggtttatttagggtgggtttagggtttagggtt	27	gra-MIR8674b,gra-MIR8674b,gra-MIR8674b,gra-MIR8674b,gra-MIR8674b,gra-MIR8674b,gra-MIR8674b,gra-MIR8674b,gra-MIR8674b,stu-MIR8005c,stu-MIR8005c,stu-MIR8005c,stu-MIR8005c,stu-MIR8005c,stu-MIR8005c,stu-MIR8005c,stu-MIR8005c,stu-MIR8005c,stu-MIR8005a,stu-MIR8005a,stu-MIR8005a,stu-MIR8005a,stu-MIR8005a,stu-MIR8005a,stu-MIR8005a,stu-MIR8005a,stu-MIR8005a,	gra-MIR8674b	atctttcctatcacattatccatggtctctttccaagtatttaatgacatatctgaatttttttccatgccattaacacataattttggtaagttgttccttcagccctaaatctagaaccttgaaccccaaatctgaacaccgaatccaaaccttgaacctcgaattttaaaccctaaactcaaacccaaaccctaaatcctaaaacttaagttcaaggtttagggttcaaatttggggctcaaggtttaggttcgaggttgaaggtttgggcttagggtttaaggtttagggttttgggttcaaggtttaagattcaagatttaagattcagagttgggggttctaggtttaaggttcaaggtaaaagaaaattataaaaattatgtgtcaatgaca…	gra-MIR8674b-p5	tagggtttaaggtttagggtt	5'	New	gp2b	..(((..(...........(((..(..(((..(((((...(((..(........)..)))...)))))..)))..)..))).......(((..(..(..((..(........)..))..)..)..)))....................)..)))..............	168	38.1	-9.5	0.1	44.5	22.5	22.5	7.5	2.5	4	44	3	0	0	0	8	5.5	0	29	0	0	0	22	0	0	43.5	21	10	4	10.5
161	153	gra-MIR8674b-p5_2ss11TC18AC	AAACCCTAAACCCTAAACC	19	TRINITY_DN26531_c1_g1	+	10	141	AAACCCTAAACCCTAAACCctaaacccaccctaaataaaccttaaataaaccctaaatcctaaaccctaaaccccaaaccccaaaatcctaaaccctaaaacctaaactctaaaccctaaaaccctaaaacc	3	gra-MIR8674b,gra-MIR8674b,gra-MIR8674b,	gra-MIR8674b	atctttcctatcacattatccatggtctctttccaagtatttaatgacatatctgaatttttttccatgccattaacacataattttggtaagttgttccttcagccctaaatctagaaccttgaaccccaaatctgaacaccgaatccaaaccttgaacctcgaattttaaaccctaaactcaaacccaaaccctaaatcctaaaacttaagttcaaggtttagggttcaaatttggggctcaaggtttaggttcgaggttgaaggtttgggcttagggtttaaggtttagggttttgggttcaaggtttaagattcaagatttaagattcagagttgggggttctaggtttaaggttcaaggtaaaagaaaattataaaaattatgtgtcaatgaca…	gra-MIR8674b-p5	aaaccctaaatcctaaaac	5'	New	gp2b	...............................(((.......)))........................................................................................	132	37.9	2.7	-0.1	25.5	12	11.5	0	2.5	10	8.5	0	0	9	0	7	0	0	8	5	6	0	9	0	5	0	5	0	0	0
162	154	gra-MIR8674b-p5_2ss10TC17AC	AACCCTAAACCCTAAACC	18	TRINITY_DN26531_c1_g1	+	327	401	AACCCTAAACCCTAAACCctaaatcctaaaccctaaaccctaaatcctaaaccctaaaccctaaatcctaaaccc	9	gra-MIR8674b,gra-MIR8674b,gra-MIR8674b,gra-MIR8674b,gra-MIR8674b,gra-MIR8674b,gra-MIR8674b,gra-MIR8674b,gra-MIR8674b,	gra-MIR8674b	atctttcctatcacattatccatggtctctttccaagtatttaatgacatatctgaatttttttccatgccattaacacataattttggtaagttgttccttcagccctaaatctagaaccttgaaccccaaatctgaacaccgaatccaaaccttgaacctcgaattttaaaccctaaactcaaacccaaaccctaaatcctaaaacttaagttcaaggtttagggttcaaatttggggctcaaggtttaggttcgaggttgaaggtttgggcttagggtttaaggtttagggttttgggttcaaggtttaagattcaagatttaagattcagagttgggggttctaggtttaaggttcaaggtaaaagaaaattataaaaattatgtgtcaatgaca…	gra-MIR8674b-p5	aaccctaaatcctaaaac	5'	New	gp2b	.............................................................((.....)).....	75	40	3.3	-0.1	6.5	0	3.5	0	2.5	0	2.5	0	0	0	0	0	0	0	0	0	0	0	0	0	0	0	0	0	0	0
163	155	gra-MIR8751b-p5_2ss16TA19GA	TGGCACCGAAAATGTATCA	19	TRINITY_DN44497_c1_g3	+	362	443	ccaTGGCACCGAAAATGTATCAgggctcaagtgattcaccgaagcgacgagaccttgaaagctgctttttcaagtgtcagta	1	gra-MIR8751b,	gra-MIR8751b	aaatggaggtTGAAATTTGTAGAGAGATAACGCTccaagcaggatccactgtcagcaagagtactaaaagcacgtccaactggaagagcatccaactaacatggcaccgaaaatgtttcgagttgaacttgctttcagtactcttgctgacagtgcgtcctacttggaatgttatctctctacaaatttcaacctcccact	gra-MIR8751b-p5	tggcaccgaaaatgtttcg	5'	New	gp2b	...((((((.(((((.((((((((((((...((.(((...))).))..))).))))))....))).)))))..))))))...	82	47.6	-21.9	0.6	0	0	0	0	0	0	0	0	0	21	16	11	30	6	0	12	0	5	7	5	11	0	0	0	0	0
164	156	gra-MIR8757b-p5_1ss1TG	GATTTTGGGTTGGGTCGA	18	TRINITY_DN44995_c1_g1	+	417	475	gGATTTTGGGTTGGGTCGAccggtccgcctcaggtgtgcaccggtcgtctcgtcccttc	2	lja-MIR11073,gra-MIR8757b,	gra-MIR8757b	tattttgggtTGGGTCGAGCTTAGGCAAGCATAatgtatgttaatatcttgcttaggcccgacccgactagaacta	gra-MIR8757b-p5	tattttgggtTGGGTCGA	5'	New	gp2b	.......(((..(((.((((((((.((((...))))...)))))))).)))..)))...	59	64.4	-27.8	0.7	74	83	108	135	129	168	216	570	384	898	740	500	845	116	219	609	465	223	757	369	784	134	88	57	76	101
165	157	gra-MIR8767a-p3_2ss8TC20TA	TTCTTTCCATTTTTCTGCTAC	21	TRINITY_DN42591_c0_g1	+	131	193	ctgctctggtggagagatggtgggacaccaccaaTTCTTTCCATTTTTCTGCCACcggggata	1	gra-MIR8767a,	gra-MIR8767a	cctctcatttTTCAACTCTGCCAAGCAATTGatgaaaagaaaattacttctttttcaattttcccatctttcttatcaagcacattaatggaaaatgtatttttttctttctatttttctgcttcttcaatgttccatatttctaaattttcttttcaccaattgcttggcagagttgaaaaatgagagga	gra-MIR8767a-p3	ttctttctatttttctgcttc	3'	New	gp2b	...((((((((((((((((((((....))))))............))))).)))))))))...	63	52.4	-28	0.8	0	0	0	0	0	0	0	0	0	0	0	0	0	0	0	0	0	0	7	0	0	8	0	0	0	5
166	158	sly-MIR9476-p3_1ss9AG	AAAATATAGAAAAAGATG	18	TRINITY_DN26971_c2_g1	+	128	172	aaaatctgattctaagttgtaaagcAAAATATAGAAAAAGATGtg	1	sly-MIR9476,	sly-MIR9476	cctgtccaaaactgctattggTCTAGTCCTGCATCTTTTTTTacattttttccgttatcaaaaaatataaAAAAAGATGCAGGACTAGACCaatagcaggatggattgg	sly-MIR9476-p3	aaaatataaAAAAAGATG	3'	New	gp2b	...((((..(((((..(((.....)))....)))))..))))...	45	24.4	-7.5	0.7	0	0	0	0	0	0	0	0	21	0	0	0	0	0	0	0	0	0	0	0	0	0	0	0	0	0
167	159	gma-MIR9728-p5_1ss6CG	ACCCGGAGAACTGAAACA	18	TRINITY_DN25473_c1_g2	+	4	38	aACCTGGAGAACTGAAACAtctaagtacccagagg	1	gma-MIR9728,	gma-MIR9728	caaccCGCAGAACTGAAACAAGTTGAgaaatgctcatctctttgtagtttttatgggtggtcgaagcgaacataggtggagacccaagttcggcttttagttgcaaggccatggagaagctcaaaaccctcaaactttgagggcaaaatgggcaaaggatttctcaacttgtttcagttttgcatg	gma-MIR9728-p5	accCGCAGAACTGAAACA	5'	New	gp2b	...((((...(((..........)))..))))...	35	45.7	-5.2	0.3	0	0	0	0	0	0	0	0	0	0	0	5.5	0	0	0	0	0	0	0	0	0	0	0	0	0	0
168	160	gma-MIR9728-p3_1ss6CG	ACCCGGAGAACTGAAACA	18	TRINITY_DN28984_c1_g1	+	161	180	aACCGGGAGAACTGAAACAt	1	gma-MIR9728,	gma-MIR9728	caaccCGCAGAACTGAAACAAGTTGAgaaatgctcatctctttgtagtttttatgggtggtcgaagcgaacataggtggagacccaagttcggcttttagttgcaaggccatggagaagctcaaaaccctcaaactttgagggcaaaatgggcaaaggatttctcaacttgtttcagttttgcatg	gma-MIR9728-p3	accCGCAGAACTGAAACA	3'	New	gp2b	...(((.....)))......	20	45	-1.8	0.2	0	0	0	0	0	0	0	0	0	0	0	5.5	0	0	0	0	0	0	0	0	0	0	0	0	0	0
169	161	mdm-MIR11004-p3_2ss19TC20TC	CTATCCTACCTGAGCTTTCCC	21	TRINITY_DN30612_c3_g2	+	251	319	attgtgaaggtggcttgttcatgttaattgggtgCTATCCTACCTGAGCTTTCCCagagcctttacttc	1	mdm-MIR11004,	mdm-MIR11004	tgaatttgggacgagttttgtggtggtgttgaagggaggtggtggttgatgggaatttggtgctatcctacctgagctttttcttcgtatttctatattcgttcctaccGTATTCTTTCATCTTCTACTActtatcgatcccttccctt	mdm-MIR11004-p3	ctatcctacctgagctttttc	3'	New	gp2b	...((((((((((...(((((.((.....(((.....))).)).)))))...))....))))))))...	115	44.9	-18.1	0.6	51	77	130.5	0	0	2.5	3.5	4.5	7	0	3.5	2.5	9.5	24	5.5	3	8	0	8	0	0	5.5	2.5	0	0	2.5
170	161	mdm-MIR11004-p3_2ss19TC20TC	CTATCCTACCTGAGCTTTCCC	21	TRINITY_DN30612_c3_g4	+	320	434	ccagtgatcggagtgccaccggaggctttcaatttggcgttgggagctctgttgtgacagtggcttgttcatgctaatttggtgCTATCCTACCTGAGCTTTTCCtctccacctc	1	mdm-MIR11004,	mdm-MIR11004	tgaatttgggacgagttttgtggtggtgttgaagggaggtggtggttgatgggaatttggtgctatcctacctgagctttttcttcgtatttctatattcgttcctaccGTATTCTTTCATCTTCTACTActtatcgatcccttccctt	mdm-MIR11004-p3	ctatcctacctgagctttttc	3'	New	gp2b	...(((...((((.((((..((((((..((((.(((((((.(((((((((((....)))).)))))..))))))))).)))).))).)))....)).))..))))....)))...	115	52.2	-31.6	0.5	51	77	130.5	0	0	2.5	3.5	4.5	7	0	3.5	2.5	9.5	24	5.5	3	8	0	8	0	0	5.5	2.5	0	0	2.5
171	162	lja-MIR11071-p5_2ss10AC18TA	GGGGATGAGCTGAGGATA	18	TRINITY_DN36163_c1_g2	+	309	372	GGGGATGAGCTGAGGATAggagtgaaaggctaaacaaactcggagaTAGCTGGTTCTCCTCGAA	2	lja-MIR11071,hbr-MIR166a,	lja-MIR11071	cttatatctaacttaattaacatgttcctacttccccatcaggctctgataccaagaggggttcggaagcagaaggagggggatgagatgaGGATTAAGAGAAGTAGGAC	lja-MIR11071-p5	ggggatgagatgaGGATT	5'	New	gp2b	(((((.(((((.((.((..((((..............))))....))..))))))))))))...	64	50	-14.3	0.4	0	0	0	0	0	0	5	0	0	0	0	0	0	0	0	0	0	0	0	0	0	0	0	0	0	0
171	163	hbr-MIR166a-p3_2ss6AG17GA	TAGCTGGTTCTCCTCGAA	18	TRINITY_DN36163_c1_g2	+	309	372	GGGGATGAGCTGAGGATAggagtgaaaggctaaacaaactcggagaTAGCTGGTTCTCCTCGAA	2	lja-MIR11071,hbr-MIR166a,	hbr-MIR166a	aggaagcttttctttttgaggggaatgttgtctggttcaaggtcatgcgatgctatacatatgatttgtttatcttttagctagttctccTCGGACCAGGCTTCATTCCtctcaattactgcttcca	hbr-MIR166a-p3	tagctagttctccTCGGA	3'	New	gp2b	(((((.(((((.((.((..((((..............))))....))..))))))))))))...	26	50	-14.3	0.4	0	0	0	0	0	0	0	0	3	0	0	0	0	5.5	0	0	0	3	0	6.5	0	0	0	0	0	0
172	163	hbr-MIR166a-p3_2ss6AG17GA	TAGCTGGTTCTCCTCGAA	18	TRINITY_DN22917_c0_g1	+	18	43	ctcggagaTAGCTGGTTCTCCTCGAA	1	hbr-MIR166a,	hbr-MIR166a	aggaagcttttctttttgaggggaatgttgtctggttcaaggtcatgcgatgctatacatatgatttgtttatcttttagctagttctccTCGGACCAGGCTTCATTCCtctcaattactgcttcca	hbr-MIR166a-p3	tagctagttctccTCGGA	3'	New	gp2b	...(((((........))))).....	26	53.8	-7.1	0.5	0	0	0	0	0	0	0	0	3	0	0	0	0	5.5	0	0	0	3	0	6.5	0	0	0	0	0	0
173	164	lja-MIR11077c-p5_1ss2CA	CATTTCCTTTCCTTTCCT	18	TRINITY_DN36387_c0_g1	-	203	286	ctagcCATTTCCTTTCCTTTCCTcgcccaatcttctttggtgggcagataacccaatccaaaggtatgtggattatgtggcact	1	lja-MIR11077c,	lja-MIR11077c	aggaaaggaaaggaaaggaaaacacGGAAATCGAGGAGTGAACTTGgactattccaagttcactcctcgatttccgtgttttcctttcctttcctttcct	lja-MIR11077c-p5	cctttcctttcctttcct	5'	New	gp2b	...(((((.(((...(((((....(((((.((......))))))).(((......))).))))).....)))....)))))...	84	46.4	-22.1	0.6	18	23	24	10	0	0	0	0	0	0	0	0	0	0	0	0	0	0	0	0	0	0	0	0	0	0
174	165	lja-MIR11079-p5_1ss8AT	AAGGCCATGGGGAGATACC	19	TRINITY_DN29874_c1_g3	+	1	163	cgggcattgagaaggaaggacgctttcagaggcgaAAGGCCATGGGGAGATACCgtctgtgatccatggatctccgatcgggaaaccgtatccaagctccgtggctagtctgcgctctttggacttttcaaacttagcgaactgaaacatctgagtagctaaa	1	lja-MIR11079,	lja-MIR11079	gttggggagagtcacgacgaggacccatgggccaaggccaaggggagataccAAGGAGATCTTGGACACCACatcttaacctagagccttaaggttttgggttaagatGTGGTGTCCAATATCTCCTTGGtgtttcccctcgaccttgtcccatgggtcctcgttgtgactctccccaac	lja-MIR11079-p5	aaggccaaggggagatacc	5'	New	gp2b	..((((((.(((....((..((((((((((((((...((((((((((((((.((((.........))))))))))((((((....))).)))......))))))))......))).)))))))............))))..))......))).))).)))...	78	50.9	-53.2	0.6	0	0	0	0	0	0	0	0	2.5	2.5	0	2.5	0	0	0	0	0	0	3	3	0	0	0	0	0	0
175	165	lja-MIR11079-p5_1ss8AT	AAGGCCATGGGGAGATACC	19	TRINITY_DN30561_c3_g2	-	166	243	aAAGGCCATGGGGAGATAACctccttgatcaaatttgtagaggactgaacttagatagagaatctcaacagtgccaat	1	lja-MIR11079,	lja-MIR11079	gttggggagagtcacgacgaggacccatgggccaaggccaaggggagataccAAGGAGATCTTGGACACCACatcttaacctagagccttaaggttttgggttaagatGTGGTGTCCAATATCTCCTTGGtgtttcccctcgaccttgtcccatgggtcctcgttgtgactctccccaac	lja-MIR11079-p5	aaggccaaggggagatacc	5'	New	gp2b	...(((..((..(((((....(((((...((....))..))))).....(((.....))).)))))..))..)))...	78	41	-18.2	0.6	0	0	0	0	0	0	0	0	2.5	2.5	0	2.5	0	0	0	0	0	0	3	3	0	0	0	0	0	0
176	166	lja-MIR11112-p5_2ss4AC18TG	TGACAAATAAAATAAAAG	18	TRINITY_DN40079_c3_g2	+	113	165	aaaTGACAAATAAAATAAAAGtggataggagacactgtatggtcgtgtcagac	1	lja-MIR11112,	lja-MIR11112	cctctcaagtgtaaaaaaacttgagagtgttaacttttactatctcgccattaatttttgtgtagataataaatgaaaaataaaataaaattaatggTGAGATGATGAAACTTGACACtctcaattttttttacacgagg	lja-MIR11112-p5	tgaaaaataaaataaaat	5'	New	gp2b	...(((((......(((..((((.........)))).))).....)))))...	122	35.8	-8.4	0.4	0	0	0	4.5	3.5	0	0	0	0	0	0	0	0	0	0	0	0	0	0	0	0	0	0	0	0	0
177	166	lja-MIR11112-p5_2ss4AC18TG	TGACAAATAAAATAAAAG	18	TRINITY_DN45948_c0_g1	-	355	476	aaacTGACAAATAAAATAAAAGtggataggagacactgtatggtcgtgtcagaccgtttgttgaagacactgtgtggtcgtgtcgaaccgttgtagcagacactgtgtggtcgtgtcagacc	1	lja-MIR11112,	lja-MIR11112	cctctcaagtgtaaaaaaacttgagagtgttaacttttactatctcgccattaatttttgtgtagataataaatgaaaaataaaataaaattaatggTGAGATGATGAAACTTGACACtctcaattttttttacacgagg	lja-MIR11112-p5	tgaaaaataaaataaaat	5'	New	gp2b	...((((((...........((((.........))))..((((((......)))))).....((..((((.((((.((..(..((...))..)..))..)))).))))..)).))))))...	122	45.9	-29.9	0.5	0	0	0	4.5	3.5	0	0	0	0	0	0	0	0	0	0	0	0	0	0	0	0	0	0	0	0	0
178	167	cst-MIR11334-p5_2ss8TG17TC	AAGGAGTGTGTAACAACT	18	TRINITY_DN22872_c0_g1	+	247	268	AAGGAGTGTGTAACAACTcacc	1	cst-MIR11334,	cst-MIR11334	taaacatttttatttaatatgagAATTACTATAATAACACCTTCACATtcgtatgcatcaattttgtaaatatgtaaggagtttgtaacaattactacttggtggaataaaagtgtata	cst-MIR11334-p5	aaggagtttgtaacaatt	5'	New	gp2b	...((((........))))...	22	45.5	-4.2	0.4	0	0	0	0	3	0	0	6	5.5	10	9.5	5	14	9	2.5	14.5	3.5	5.5	7.5	0	6.5	0	0	0	0	0
179	167	cst-MIR11334-p5_2ss8TG17TC	AAGGAGTGTGTAACAACT	18	TRINITY_DN45076_c1_g2	+	557	578	AAGGAGTGTGTAACAACTcacc	1	cst-MIR11334,	cst-MIR11334	taaacatttttatttaatatgagAATTACTATAATAACACCTTCACATtcgtatgcatcaattttgtaaatatgtaaggagtttgtaacaattactacttggtggaataaaagtgtata	cst-MIR11334-p5	aaggagtttgtaacaatt	5'	New	gp2b	...((((........))))...	22	45.5	-4.2	0.4	0	0	0	0	3	0	0	6	5.5	10	9.5	5	14	9	2.5	14.5	3.5	5.5	7.5	0	6.5	0	0	0	0	0
180	168	cst-MIR11334-p3_2ss9TG18TC	TAAGGAGTGTGTAACAAC	18	TRINITY_DN24407_c1_g4	+	180	278	aagtgcacgctcacccagataccacaaaaggtgtcgattcatccagacagcaggacggtggtcatggaagtcgaaatccgcTAAGGAGTGTGTAACAAC	1	cst-MIR11334,	cst-MIR11334	taaacatttttatttaatatgagAATTACTATAATAACACCTTCACATtcgtatgcatcaattttgtaaatatgtaaggagtttgtaacaattactacttggtggaataaaagtgtata	cst-MIR11334-p3	taaggagtttgtaacaat	3'	New	gp2b	...(((((((((.....((((((......))))))((((..(((((((..(......)..))).)))))))).............))))))))).....	99	50.5	-30	0.6	0	0	0	0	0	0	3	6	5	12	6.5	2.5	2.5	3	0	0	0	4.5	6	0	6.5	0	0	0	0	0
181	169	cst-MIR11334-p5_2ss9TG18TC_2	TAAGGAGTGTGTAACAACT	19	TRINITY_DN24915_c0_g2	+	1	61	ggaagttgaaatctgcTAAGGAGTGTGTAACAACTcacgtgccgaatgaattagctccgaa	1	cst-MIR11334,	cst-MIR11334	taaacatttttatttaatatgagAATTACTATAATAACACCTTCACATtcgtatgcatcaattttgtaaatatgtaaggagtttgtaacaattactacttggtggaataaaagtgtata	cst-MIR11334-p5	taaggagtttgtaacaatt	5'	New	gp2b	((.((((((..((.((....((((........))))....)).)).....))))))))...	30	44.3	-13.4	0.5	0	0	0	0	0	0	0	4	8	5	4.5	0	4.5	3.5	0	6	0	0	4.5	5	0	3.5	0	0	0	0
182	169	cst-MIR11334-p5_2ss9TG18TC_2	TAAGGAGTGTGTAACAACT	19	TRINITY_DN24915_c0_g3	+	43	72	TAAGGAGTGTGTAACAACTcacctgccgaa	1	cst-MIR11334,	cst-MIR11334	taaacatttttatttaatatgagAATTACTATAATAACACCTTCACATtcgtatgcatcaattttgtaaatatgtaaggagtttgtaacaattactacttggtggaataaaagtgtata	cst-MIR11334-p5	taaggagtttgtaacaatt	5'	New	gp2b	...((((.(((........))))).))...	30	46.7	-5.4	0.4	0	0	0	0	0	0	0	4	8	5	4.5	0	4.5	3.5	0	6	0	0	4.5	5	0	3.5	0	0	0	0
183	170	cst-MIR11334-p5_2ss9TG18TC_1	TAAGGAGTGTGTAACAAC	18	TRINITY_DN42894_c0_g2	+	20	42	TAAGGAGTGTGTAACAACtcacc	1	cst-MIR11334,	cst-MIR11334	taaacatttttatttaatatgagAATTACTATAATAACACCTTCACATtcgtatgcatcaattttgtaaatatgtaaggagtttgtaacaattactacttggtggaataaaagtgtata	cst-MIR11334-p5	taaggagtttgtaacaat	5'	New	gp2b	....((((........))))...	23	43.5	-4.2	0.4	0	0	0	0	0	0	3	6	5	12	6.5	2.5	2.5	3	0	0	0	4.5	6	0	6.5	0	0	0	0	0
184	171	cas-MIR11592-p3_2ss1AG17AT	GACCGAACCGAACCGATCC	19	TRINITY_DN32879_c3_g3	+	56	74	AACCGAACCGAACCGATCC	1	cas-MIR11592,	cas-MIR11592	aaccgaaccGAACCGAACCGAACCGAAAaaataactttttccaatttggtatttttgtattggtatgtttgcttaatttcggtt	cas-MIR11592-p3	aaccGAACCGAACCGAACC	3'	New	gp2b	...((........))....	19	57.9	0.2	0	2.5	0	0	0	0	0	0	0	0	0	0	0	0	0	0	0	0	0	2.5	0	0	0	0	0	0	0
185	172	cas-MIR11592-p5_2ss1AG17AT	GACCGAACCGAACCGATCC	19	TRINITY_DN34898_c0_g1	+	346	411	GACCGAACCGAACCGATCCgccgcattttggacggatgcgtgatgacgagcggacggttgcggatt	1	cas-MIR11592,	cas-MIR11592	aaccgaaccGAACCGAACCGAACCGAAAaaataactttttccaatttggtatttttgtattggtatgtttgcttaatttcggtt	cas-MIR11592-p5	aaccGAACCGAACCGAACC	5'	New	gp2b	.......((((((((.(((((((((((....(((....))))))).)).)))))))))).)))...	66	60.6	-25.9	0.6	2.5	0	0	0	0	0	0	0	0	0	0	0	0	0	0	0	0	0	2.5	0	0	0	0	0	0	0
1	1	ptc-miR156a_L+1	CTGACAGAAGAGAGTGAGCAC	21						231	ptc-MIR156f,mtr-MIR156i,mtr-MIR156d,mtr-MIR156b,mtr-MIR156c,mtr-MIR156a,mtr-MIR156f,mtr-MIR156h,mtr-MIR156e,mtr-MIR156g,gma-MIR156a,gma-MIR156u,gma-MIR156o,gma-MIR156h,gma-MIR156s,gma-MIR156y,gma-MIR156w,gma-MIR156k,gma-MIR156x,gma-MIR156n,gma-MIR156q,gma-MIR156v,gma-MIR156f,gma-MIR156b,gma-MIR156g,gma-MIR156e,gma-MIR156c,gma-MIR156j,gma-MIR156l,gma-MIR156m,gma-MIR156i,gma-MIR156d,ptc-MIR156c,ptc…	ptc-MIR156b	gtaagggaggTGACAGAAGAGAGTGAGCACacagggtactttcttgcatgacatccatgcttgaaactttgcgtgctcactctctatctgtcaccccacca	ptc-miR156a	TGACAGAAGAGAGTGAGCAC	5'	Diff	gp3	.....(((.(((((((((((((((((((((((((....((.(((.(((((....))))).)))))...)))))))))))).))))))))))))))))....	101	43.6	-54.1	1.2	306	446	480.5	260.5	255	291.5	1332	997	652.5	352.5	529	723	659	1897.5	1314.5	310.5	740.5	171	1519.5	346	249	1446	908.5	663	319	358.5
1	2	mtr-miR156i-3p_3ss14TC15T-22TG	TGCTCACTTCTCTCCTGTCAGC	22						231	ptc-MIR156f,mtr-MIR156i,mtr-MIR156d,mtr-MIR156b,mtr-MIR156c,mtr-MIR156a,mtr-MIR156f,mtr-MIR156h,mtr-MIR156e,mtr-MIR156g,gma-MIR156a,gma-MIR156u,gma-MIR156o,gma-MIR156h,gma-MIR156s,gma-MIR156y,gma-MIR156w,gma-MIR156k,gma-MIR156x,gma-MIR156n,gma-MIR156q,gma-MIR156v,gma-MIR156f,gma-MIR156b,gma-MIR156g,gma-MIR156e,gma-MIR156c,gma-MIR156j,gma-MIR156l,gma-MIR156m,gma-MIR156i,gma-MIR156d,ptc-MIR156c,ptc…	mtr-MIR156i	gatatTGACAGAAGAGAGTGAGCACatgctgcagtgattgtatgatagcatacaattcttggtgcgTGCTCACTTCTCTTTCTGTCATCttat	mtr-miR156i-3p	TGCTCACTTCTCTTTCTGTCATC	3'	Diff	gp3	.....(((.(((((((((((((((((((((((((....((.(((.(((((....))))).)))))...)))))))))))).))))))))))))))))....	93	43.6	-54.1	1.2	1324	2682	3110	1842	1606	2079	6085	2794	2833	568	964	1613	2107	5846	3950	642	1912	389	3741	500	451	3117	2298	1670	1155	1698
2	3	gma-miR156aa_R+2	ATTGGAGTGAAGGGAGCTCC	20						16	gma-MIR156z,mtr-MIR159b,gma-MIR159b,gma-MIR156aa,gma-MIR159c,gma-MIR159f,ptc-MIR159d,ptc-MIR159c,mdm-MIR159b,mdm-MIR159a,mdm-MIR159c,mes-MIR159c,mes-MIR159d,lus-MIR159a,cme-MIR159b,cpa-MIR159b,	gma-MIR159f	acccaagttgGAGTTCCCTGCACTCCAAGTCtgaaaggatatgatggtaaacctctgctgctagttcatggatacctctggcctcgtaacaacatgcgttcgaagtcaagggtttgcatgacctgggagatgagtttaccttgaccttttggtATTGGAGTGAAGGGAGCTccagagggt	gma-miR156aa	ATTGGAGTGAAGGGAGCT	3'	Diff	gp3	.....((.(((((((((((((..(((((((((..(((((((......(((((.(((((.((.((((((((((...(((..((..(((((((........)))))))..))..)))...)))))).)))))).))))))))))....)))))))..)))))))))..))))))))).)))).))....	180	44.9	-82	1	3.33333	0	3	0	3	8.66667	120.083	155.667	5	169	112.667	213.667	120	69.9167	107	210	239.25	108	241	149.333	81	36.0167	10.3333	10.2	15	12
3	4	aly-miR158a-3p	TCCCAAATGTAGACAAAGCA	20						2	aly-MIR158a,ath-MIR158a,	aly-MIR158a	acgtcatctctgtgcttCTTTGTCTACAATTTTGGAAAaagtggtgacgccattgctcttTCCCAAATGTAGACAAAGCAataccgtgatgacgt	aly-miR158a-3p	TCCCAAATGTAGACAAAGCA	3'	Yes	gp3	((((((((...(((...(((((((((((.(((.(((((.((..(((....)))..)).))))).))))))))))))))...)))...))))))))	95	42.1	-41	1	0	0	25	0	0	0	2.5	4	0	4	0	15	0	16.5	0	12.5	7.5	9.5	0	9	10	10.5	0	13	0	0
4	5	mes-miR159a-5p_1ss10GT	AGCTGCTGATCTATGGATCCC	21						35	hbr-MIR159a,mtr-MIR159a,gma-MIR159a,gma-MIR159e,ptc-MIR159a,ptc-MIR159b,ath-MIR159a,ath-MIR159b,ath-MIR159c,mdm-MIR159d,mdm-MIR159e,mdm-MIR159f,aly-MIR159a,aly-MIR159b,aly-MIR159c,ppe-MIR159,mes-MIR159b,mes-MIR159a,vvi-MIR159c,nta-MIR159,csi-MIR159a,lus-MIR159b,lus-MIR159c,cme-MIR159a,sly-MIR159,bra-MIR159a,bna-MIR159,cas-MIR159b,cas-MIR159c,cas-MIR159a,cpa-MIR159a,rco-MIR159,aqc-MIR159,ahy-MIR15…	mes-MIR159a	tggagctccttgaagtccaatagaggatcttgctgggtagattgAGCTGCTGAGCTATGGATCCCacagccctatctcataataaagactttagtcttcttggataggcttgtggcttgcatatctcaggagcttcattacctcttatgttagatccttgTTTGGATTGAAGGGAGCTCTA	mes-miR159a-5p	AGCTGCTGAGCTATGGATCCC	5'	Diff	gp3	........(((...(((..(.(((.((((((((((((..(((((((..((((.(((..((((((((...(((((.(((((.((((....((.((..(((((((.......(((((.....))))))))))))..)).))....)))).))))).)))))..))))).))...)..))).))))..)))))))..)))))))))))).))).)..)))))).	181	43.9	-85.5	0.9	1277.5	2207.5	2515.5	845	781.5	931	804	920	148	491	438	798.5	1268	536	2563	422.5	775.5	130	1396	315.5	179.5	2651	1541	1238	812.5	970.5
4	6	hbr-miR159a	TTTGGATTGAAGGGAGCTCTA	21						35	hbr-MIR159a,mtr-MIR159a,gma-MIR159a,gma-MIR159e,ptc-MIR159a,ptc-MIR159b,ath-MIR159a,ath-MIR159b,ath-MIR159c,mdm-MIR159d,mdm-MIR159e,mdm-MIR159f,aly-MIR159a,aly-MIR159b,aly-MIR159c,ppe-MIR159,mes-MIR159b,mes-MIR159a,vvi-MIR159c,nta-MIR159,csi-MIR159a,lus-MIR159b,lus-MIR159c,cme-MIR159a,sly-MIR159,bra-MIR159a,bna-MIR159,cas-MIR159b,cas-MIR159c,cas-MIR159a,cpa-MIR159a,rco-MIR159,aqc-MIR159,ahy-MIR15…	hbr-MIR159a	ttgaatactgatttagggttaagaagtggagctccttgaagtccaatagaggttcttgctgggtagattgagctgctgagctatggatccctcagccctatcccatcataaagagtagtcctcttggataggcttgtggcttgcatatctcaggagcttcattacctcatatgttagatccttgTTTGGATTGAAGGGAGCTCTAcatctaagtctttcac	hbr-miR159a	TTTGGATTGAAGGGAGCTCTA	3'	Yes	gp3	........(((...(((..(.(((.((((((((((((..(((((((..((((.(((..((((((((...(((((.(((((.((((....((.((..(((((((.......(((((.....))))))))))))..)).))....)))).))))).)))))..))))).))...)..))).))))..)))))))..)))))))))))).))).)..)))))).	221	43.9	-85.5	0.9	22634.8	27920	36930.2	11772.5	12975.3	12978	52134.9	53133	3685	36383	21497.5	36700.5	33708.5	83677.8	45127.3	24258.2	46788.3	12914.8	61674.3	20350.3	10116.5	100363	62396.5	42372.3	26496.1	27732.2
5	7	vvi-miR159a_R-1_1ss7GT	CTTGGATTGAAGGGAGCTCT	20						2	vvi-MIR159a,vvi-MIR159b,	vvi-MIR159b	gggcttgtgggagcttctttacactccagaactgaaaggagatactactgctggttcatgaaaacctatggctgcattctctatactgaaattttgtatacaaactatgggtttgcatgaacttggagaagtgtttgcttttatcttttctggcCTTGGAGTGAAGGGAGCTCTCataaccgatc	vvi-miR159a	CTTGGAGTGAAGGGAGCTCTC	3'	Diff	gp3	(((.((((((((((((((((.((((((((..((..(((((......((((.((((..((.((((.(((((..(((((((((.((((((..((((......))))..))))))..)))))))))..))))).).)))))..)))).))))....)))))..))..)))))))))))))))))))))))))))...	185	47.9	-92.7	1	5	3	3.66667	5	7.33333	5.33333	20.0833	17.3333	0	13	4.33333	13.8333	14	52.9167	8.33333	8.66667	23.5833	14.3333	19.3333	4	5	37.0833	13.6667	14.0833	12.5833	7.66667
6	8	cpa-miR159a	TTTGGATTGAAGGGAGCTCTA	21						2	cpa-MIR159a,stu-MIR408b,	cpa-MIR159a	gagctccttgaagtccaatagAGGATTTTGCAGGGTTGATtgagctgccgagctatggattccacagccctacccgaagttatactttttctgggtaggcttgcggtttgcatatctcaggagctgcattaccctaagcttaatccttgTTTGGATTGAAGGGAGCTCTAg	cpa-miR159a	TTTGGATTGAAGGGAGCTCTA	3'	Yes	gp3	(((((((((..(((((((..(((((((..(((((((....((((((.(((((.((((....((.((..(((((((((((........)))).)))))))..)).))....)))).))).)))))).))..)))))..))..)))))))..)))))))..)))))))))...	171	47.4	-79	1	22634.8	27920	36930.2	11772.5	12975.3	12978	52134.9	53133	3685	36383	21497.5	36700.5	33708.5	83677.8	45127.3	24258.2	46788.3	12914.8	61674.3	20350.3	10116.5	100363	62396.5	42372.3	26496.1	27732.2
7	9	csi-miR159b-5p	AGCTGCCGACTCATTCATTCA	21						2	csi-MIR159b,stu-MIR408b,	csi-MIR159b	agtccactcatggatgaggcaagggtttggattAGCTGCCGACTCATTCATTCAaacacagtagaaagaggagcattttggttatcctattgtgaatgtgtgaatgaagcgggagataatattcatcctttcttttctgtgcttggactg	csi-miR159b-5p	AGCTGCCGACTCATTCATTCA	5'	Yes	gp3	((((((..((..((..(((.((((((....((((.((.(((..(((((((..((..((((((((...((..(((......))).))))))))))..))..)))))))..))).)).))))....)))))))))..))..))..)))))).	150	42	-54.4	0.9	0	0	0	0	0	3	6	17	44	9	4.5	20.5	27	74	32	8	14.5	5	15	0	0	45.5	31	16.5	27.5	40
8	10	nta-miR160a_1ss1TN	NGCCTGGCTCCCTGTATGCCA	21						91	nta-MIR160a,mtr-MIR160b,mtr-MIR160e,mtr-MIR160d,mtr-MIR160a,mtr-MIR160c,gma-MIR160f,gma-MIR160a,gma-MIR160c,gma-MIR160b,gma-MIR160d,gma-MIR160e,ptc-MIR160b,ptc-MIR160a,ptc-MIR160d,ptc-MIR160c,ptc-MIR160g,ptc-MIR160e,ptc-MIR160f,ath-MIR160a,ath-MIR160b,ath-MIR160c,mdm-MIR160a,mdm-MIR160c,mdm-MIR160e,mdm-MIR160b,mdm-MIR160d,stu-MIR160b,stu-MIR160a,aly-MIR160b,aly-MIR160a,aly-MIR160c,ppe-MIR160a,ppe…	nta-MIR160c	aacttggatgTGCCTGGCTCCCTGTATGCCAcacactttcaccaatccgcgagttctttgattggctgatcagtgggtggcgtgcgaggagccaagcataccacattata	nta-miR160a	TGCCTGGCTCCCTGTATGCCA	5'	Diff	gp3	.......((((((.(((((((..((((((((((..(...(((((.(((....))).)))))....)..))))))))))..))))))).)))))).........	110	51.5	-49.4	0.9	121.167	193	436.333	97.3333	68.8333	78.6667	381	392.167	89.5	168	185	213.833	288.833	225.833	499.333	109.833	333.167	37.1667	433.667	79.1667	39.6667	735.833	355.667	331.833	140	133.167
9	11	ahy-miR160-5p_L+1_1ss16AT	CTGCCTGGCTCCCTGTATGCCA	22						2	ahy-MIR160,mtr-MIR160f,	ahy-MIR160	aaatattcgaattatgtgtcTGCCTGGCTCCCTGAATGCCAtgtaagttagtttgttaagaaaagattaacaaacgtcttatatgGCATGAAGGGAGTCACGCAGGcgattcattttgaaacatat	ahy-miR160-5p	TGCCTGGCTCCCTGAATGCCA	5'	Diff	gp3	.....((((((.....(((((((.(((((((((..((((((((((((...(((((((((.......)))))))))..))))))))))))..))))))))).)))))))......))))))......	126	37.3	-60.9	1.3	28.6667	40	55.3333	13.3333	10.3333	19.6667	38	41.6667	2	20	24	39.3333	40.3333	12.3333	55.3333	14.3333	48.6667	5.66667	83.6667	8.66667	8.66667	112.333	72.6667	49.3333	27	35.6667
10	12	ath-miR162a-5p_R-1_1ss5GC	TGGACGCAGCGGTTCATCGAT	21						32	cas-MIR162a,mtr-MIR162,gma-MIR162c,gma-MIR162a,gma-MIR162b,ptc-MIR162a,ptc-MIR162b,ath-MIR162b,ath-MIR162a,mdm-MIR162b,mdm-MIR162a,stu-MIR162a,stu-MIR162b,aly-MIR162a,aly-MIR162b,ppe-MIR162,mes-MIR162,vvi-MIR162,nta-MIR162b,nta-MIR162a,csi-MIR162,lus-MIR162a,lus-MIR162b,cme-MIR162,sly-MIR162,bra-MIR162,cpa-MIR162a,ghr-MIR162a,rco-MIR162,vun-MIR162,htu-MIR162a,hpe-MIR162a,	ath-MIR162a	tagttggaagaagagtgagagtcgcTGGAGGCAGCGGTTCATCGATCtcttcctgtgaacacattaaaaatgtaaaagcatgaatagaTCGATAAACCTCTGCATCCAGcgtttgcctcttgtatctttcttattgactt	ath-miR162a-5p	TGGAGGCAGCGGTTCATCGATC	5'	Diff	gp3	(((((((.((((.((((.((((((((.(((.((....)).....................(((......)))))).)))))))).)))).)))).)))))))	140	41.2	-38	0.9	112	183	254	111	114	137	363	296	23	105	84	166	198	104	229	84	183	42	283	99	44	390	303	191	124	141
10	13	cas-miR162a_R+1	TCGATAAACCTCTGCATCCAG	21						32	cas-MIR162a,mtr-MIR162,gma-MIR162c,gma-MIR162a,gma-MIR162b,ptc-MIR162a,ptc-MIR162b,ath-MIR162b,ath-MIR162a,mdm-MIR162b,mdm-MIR162a,stu-MIR162a,stu-MIR162b,aly-MIR162a,aly-MIR162b,ppe-MIR162,mes-MIR162,vvi-MIR162,nta-MIR162b,nta-MIR162a,csi-MIR162,lus-MIR162a,lus-MIR162b,cme-MIR162,sly-MIR162,bra-MIR162,cpa-MIR162a,ghr-MIR162a,rco-MIR162,vun-MIR162,htu-MIR162a,hpe-MIR162a,	cas-MIR162a	cactggaggcagcggttcatcgatctcttcctggggacacaaaaaaaaaagaaaaataaaatggaaaagcatgaatagaTCGATAAACCTCTGCATCCAgtg	cas-miR162a	TCGATAAACCTCTGCATCCA	3'	Diff	gp3	(((((((.((((.((((.((((((((.(((.((....)).....................(((......)))))).)))))))).)))).)))).)))))))	102	41.2	-38	0.9	2260	4214	5170	1290	1212	1671	3681	4140	2155	1753	1762	2986	2271	4223	4504	995	3591	450	4143	694	382	10095	7516	5420	1310	1799
11	14	rco-miR164a	TGGAGAAGCAGGGCACGTGCA	21						86	rco-MIR164c,mtr-MIR164a,mtr-MIR164c,mtr-MIR164b,mtr-MIR164d,gma-MIR164f,gma-MIR164j,gma-MIR164e,gma-MIR164k,gma-MIR164h,gma-MIR164c,gma-MIR164b,gma-MIR164a,gma-MIR164d,gma-MIR164g,gma-MIR164i,ptc-MIR164c,ptc-MIR164e,ptc-MIR164b,ptc-MIR164d,ptc-MIR164a,ptc-MIR164f,ath-MIR164b,ath-MIR164a,ath-MIR164c,mdm-MIR164b,mdm-MIR164c,mdm-MIR164d,mdm-MIR164e,mdm-MIR164f,mdm-MIR164a,stu-MIR164,aly-MIR164a,aly-…	rco-MIR164a	cttgcTGGAGAAGCAGGGCACGTGCAattcctttctttccctctccgaattgcacgtgctccacttctccaacatggg	rco-miR164a	TGGAGAAGCAGGGCACGTGCA	5'	Yes	gp3	((.(((((.((((..(((((((((....((((((((...((....))...............(((.......)))..)).))))))....)))))))))..)))).))))).))..	78	44	-39.3	0.8	9070	13612	16165	7754	7802	9374	39298	25646	3527	11728	8328	20308	16927	33829	22202	6391	17888	5864	21276	6134	4432	17113	9721	7663	5245	5966
11	15	ath-miR164b-3p_2ss10AG16AC	CATGTGCCCGTCTTCCCCATC	21						86	rco-MIR164c,mtr-MIR164a,mtr-MIR164c,mtr-MIR164b,mtr-MIR164d,gma-MIR164f,gma-MIR164j,gma-MIR164e,gma-MIR164k,gma-MIR164h,gma-MIR164c,gma-MIR164b,gma-MIR164a,gma-MIR164d,gma-MIR164g,gma-MIR164i,ptc-MIR164c,ptc-MIR164e,ptc-MIR164b,ptc-MIR164d,ptc-MIR164a,ptc-MIR164f,ath-MIR164b,ath-MIR164a,ath-MIR164c,mdm-MIR164b,mdm-MIR164c,mdm-MIR164d,mdm-MIR164e,mdm-MIR164f,mdm-MIR164a,stu-MIR164,aly-MIR164a,aly-…	ath-MIR164b	gaTGGAGAAGCAGGGCACGTGCAttactagctcatatatacactctcaccacaaatgcgtgtatatatgcggaattttgtgatatagatgtgtgtgtgtgttgagtgtgatgatatggatgagttagttcttCATGTGCCCATCTTCACCATC	ath-miR164b-3p	CATGTGCCCATCTTCACCATC	3'	Diff	gp3	((.(((((.((((..(((((((((....((((((((...((....))...............(((.......)))..)).))))))....)))))))))..)))).))))).))..	153	44	-39.3	0.8	426	635	733	713	672	640	1093	619	418	227	145	498	388	590	487	125	289	95	413	162	77	2366	1673	1116	862	1046
12	16	gma-miR166a-5p	GGAATGTTGTCTGGCTCGAGG	21						179	gma-MIR166c,mtr-MIR166g,mtr-MIR166e,mtr-MIR166a,mtr-MIR166b,mtr-MIR166c,mtr-MIR166f,mtr-MIR166d,gma-MIR166o,gma-MIR166q,gma-MIR166a,gma-MIR166u,gma-MIR166n,gma-MIR166e,gma-MIR166t,gma-MIR166s,gma-MIR166p,gma-MIR166i,gma-MIR166d,gma-MIR166f,gma-MIR166b,gma-MIR166g,gma-MIR166h,gma-MIR166j,gma-MIR166r,gma-MIR166m,gma-MIR166k,ptc-MIR166e,ptc-MIR166m,ptc-MIR166b,ptc-MIR166l,ptc-MIR166f,ptc-MIR166h,ptc…	gma-MIR166m	tttcgttgcaaaggtgaggttgagaGGAATGTTGTCTGGCTCGAGGtcatggaggaggaggagagtattgagatgagtgaaagtttccaatggaaatttaccctcttaacacaaaaaaaaaaattgattcgCGGACCAGGCTTCATTCCCCacacccaacttttttttttattcct	gma-miR166a-5p	GGAATGTTGTCTGGCTCGAGG	5'	Yes	gp3	....((((..(((.((((((((..((((((..(((..((.((.....(((((((((..((((((....))))))....)))))))))......)).))..)))..))))))..)))))))).))).))))	176	46.2	-52.8	0.9	262.5	485.5	610.5	316	297.5	351.5	377.5	354	77.5	234.5	170.5	302	237	177.5	407.5	153	311	62	448.5	133.5	79.5	778	498.5	359	267.5	335
12	17	gma-miR166a-3p	TCGGACCAGGCTTCATTCCCC	21						179	gma-MIR166c,mtr-MIR166g,mtr-MIR166e,mtr-MIR166a,mtr-MIR166b,mtr-MIR166c,mtr-MIR166f,mtr-MIR166d,gma-MIR166o,gma-MIR166q,gma-MIR166a,gma-MIR166u,gma-MIR166n,gma-MIR166e,gma-MIR166t,gma-MIR166s,gma-MIR166p,gma-MIR166i,gma-MIR166d,gma-MIR166f,gma-MIR166b,gma-MIR166g,gma-MIR166h,gma-MIR166j,gma-MIR166r,gma-MIR166m,gma-MIR166k,ptc-MIR166e,ptc-MIR166m,ptc-MIR166b,ptc-MIR166l,ptc-MIR166f,ptc-MIR166h,ptc…	gma-MIR166g	aaaagttgaggggaatgtcgtttggttcgagatcattcatgcaagtagtctcagacataactcttctgagtgattTCGGACCAGGCTTCATTCCCCtcagctaccaagca	gma-miR166a-3p	TCGGACCAGGCTTCATTCCCC	3'	Yes	gp3	....((((..(((.((((((((..((((((..(((..((.((.....(((((((((..((((((....))))))....)))))))))......)).))..)))..))))))..)))))))).))).))))	143	46.2	-52.8	0.9	278758	422116	517264	176861	151768	175308	296124	287578	21385.5	141666	102326	141029	196547	160239	456076	95248.7	227697	37342.9	331079	79290	49063.8	241439	158612	123283	124578	150695
13	16	gma-miR166a-5p	GGAATGTTGTCTGGCTCGAGG	21						34	gma-MIR166c,mtr-MIR166e,mtr-MIR166g,gma-MIR166b,gma-MIR166l,gma-MIR166a,gma-MIR166o,gma-MIR166q,gma-MIR166u,gma-MIR166n,gma-MIR166m,gma-MIR166j,gma-MIR166h,ath-MIR166e,ath-MIR166b,ath-MIR166a,ath-MIR165a,stu-MIR166a,stu-MIR166c,aly-MIR166e,aly-MIR166a,aly-MIR166b,aly-MIR166c,aly-MIR166g,aly-MIR166d,aly-MIR165b,csi-MIR166e,csi-MIR166a,csi-MIR166b,cas-MIR166c,cas-MIR165b,cas-MIR166b,cas-MIR166a,cas…	gma-MIR166m	tttcgttgcaaaggtgaggttgagaGGAATGTTGTCTGGCTCGAGGtcatggaggaggaggagagtattgagatgagtgaaagtttccaatggaaatttaccctcttaacacaaaaaaaaaaattgattcgCGGACCAGGCTTCATTCCCCacacccaacttttttttttattcct	gma-miR166a-5p	GGAATGTTGTCTGGCTCGAGG	5'	Yes	gp3	....((((..(((.((((((((..((((((..(((..((.((.....(((((((((..((((((....))))))....)))))))))......)).))..)))..))))))..)))))))).))).))))	176	46.2	-52.8	0.9	262.5	485.5	610.5	316	297.5	351.5	377.5	354	77.5	234.5	170.5	302	237	177.5	407.5	153	311	62	448.5	133.5	79.5	778	498.5	359	267.5	335
13	17	gma-miR166a-3p	TCGGACCAGGCTTCATTCCCC	21						34	gma-MIR166c,mtr-MIR166e,mtr-MIR166g,gma-MIR166b,gma-MIR166l,gma-MIR166a,gma-MIR166o,gma-MIR166q,gma-MIR166u,gma-MIR166n,gma-MIR166m,gma-MIR166j,gma-MIR166h,ath-MIR166e,ath-MIR166b,ath-MIR166a,ath-MIR165a,stu-MIR166a,stu-MIR166c,aly-MIR166e,aly-MIR166a,aly-MIR166b,aly-MIR166c,aly-MIR166g,aly-MIR166d,aly-MIR165b,csi-MIR166e,csi-MIR166a,csi-MIR166b,cas-MIR166c,cas-MIR165b,cas-MIR166b,cas-MIR166a,cas…	gma-MIR166n	aggttgagaGGAATGTTGTCTGGCTCGAGGtcatggaggaagaggagagtactgagatcagtgaaagtttccaatggaaatttaccctcttaacacacacacagaaaaaatgattcTCGGACCAGGCTTCATTCCCCccaccc	gma-miR166a-3p	TCGGACCAGGCTTCATTCCCC	3'	Yes	gp3	....((((..(((.((((((((..((((((..(((..((.((.....(((((((((..((((((....))))))....)))))))))......)).))..)))..))))))..)))))))).))).))))	143	46.2	-52.8	0.9	278758	422116	517264	176861	151768	175308	296124	287578	21385.5	141666	102326	141029	196547	160239	456076	95248.7	227697	37342.9	331079	79290	49063.8	241439	158612	123283	124578	150695
14	18	ptc-miR166p_1ss21TC	TCGGACCAGGCTCCATTCCTC	21						2	ptc-MIR166p,stu-MIR408b,	ptc-MIR166p	taaggttgagaggaacgctgtctgggtcgaggtcatggaggccatgattatacataaatggcattatctgatgacagcccagataatcgatgcacctgtcttgaacctaaatgattcTCGGACCAGGCTCCATTCCTTccaaccat	ptc-miR166p	TCGGACCAGGCTCCATTCCTT	3'	Diff	gp3	...(((((..(((((....((((((..(((((((((..(((((((............))))).(((((((.........)))))))((((..(....)..))))..))..))))).))))..))))))....)))))..)))))..	146	46.6	-51.6	0.8	9	10	32	0	2.5	3	28	21.5	0	6	4	8.5	9.5	15	27.5	4.5	8	3	24.5	0	3.5	4	5	9	3.5	2.5
15	19	csi-miR166h-3p_L-1_1ss3TC	TCGGACCAGGCTTCCTTCCTC	21						2	csi-MIR166h,stu-MIR408b,	csi-MIR166h	gttggagttgagaggaatggcggctggttcaaggcttcaaaagagagtttcttaagaaataagaaacaattattaatctctctctaaagatagcTTTGGACCAGGCTTCCTTCCTCtcaaaattaa	csi-miR166h-3p	TTTGGACCAGGCTTCCTTCCTC	3'	Diff	gp3	.......((((((((((.((..((((((((((((((((...(((((((((((((.....)))))))).............)))))...)).))))))))))))).)..))))))))))))......	126	38.1	-49.8	1	0	3	41.5	4.5	0	0	13.5	23	0	11	8	6.5	19	22	39	10.5	22	0	23.5	6.5	5	8.5	0	5.5	0	0
16	20	bra-miR167a	TGAAGCTGCCAGCATGATCTA	21						115	bra-MIR167a,bna-MIR167c,mtr-MIR167a,mtr-MIR167b,gma-MIR167a,gma-MIR167l,gma-MIR167d,gma-MIR167b,gma-MIR167c,gma-MIR167g,gma-MIR167j,gma-MIR167e,gma-MIR167f,gma-MIR167k,ptc-MIR167a,ptc-MIR167b,ptc-MIR167c,ptc-MIR167d,ptc-MIR167e,ptc-MIR167g,ptc-MIR167f,ptc-MIR167h,ath-MIR167b,ath-MIR167a,ath-MIR167d,ath-MIR167c,mdm-MIR167e,mdm-MIR167f,mdm-MIR167c,mdm-MIR167b,mdm-MIR167g,mdm-MIR167d,mdm-MIR167a,mdm…	bra-MIR167b	ggtgtacaggcatctgaTGAAGCTGCCAGCATGATCTAattaactttctttctctgttgattttatgacaatggaaaagagatgagtgtcgattagatcatgttcgcagtttcacccattgactgtcgcacc	bra-miR167a	TGAAGCTGCCAGCATGATCTA	5'	Yes	gp3	(((((..(((((.....(((((((((.(((((((((((((..(((((((..((((((((((.......)))))))))...)..))))).))..))))))))))))).))))))))).....)).)))..)))))	132	44	-57.2	1	24668.8	50539.8	60425.6	13375.4	13160.9	17010.8	31223.9	38388.3	8511.72	13624.5	11300.2	15976.3	19452.7	34955.5	31024.3	7425.93	32073.2	4686.77	33310.1	8955.5	3578.13	6400.43	4430.8	3192.27	2647.22	3561.48
16	21	ptc-miR167f-3p_L-1_2ss10GT11-C	GATCATGTTCGCAGTTTCACC	21						115	bra-MIR167a,bna-MIR167c,mtr-MIR167a,mtr-MIR167b,gma-MIR167a,gma-MIR167l,gma-MIR167d,gma-MIR167b,gma-MIR167c,gma-MIR167g,gma-MIR167j,gma-MIR167e,gma-MIR167f,gma-MIR167k,ptc-MIR167a,ptc-MIR167b,ptc-MIR167c,ptc-MIR167d,ptc-MIR167e,ptc-MIR167g,ptc-MIR167f,ptc-MIR167h,ath-MIR167b,ath-MIR167a,ath-MIR167d,ath-MIR167c,mdm-MIR167e,mdm-MIR167f,mdm-MIR167c,mdm-MIR167b,mdm-MIR167g,mdm-MIR167d,mdm-MIR167a,mdm…	ptc-MIR167h	cgctattagtTGAAGCTGCCAACATGATCTGagctttccttaattttcctatacaggaaagactAGATCATGTGGCAGTTTCACCtattga	ptc-miR167f-3p	AGATCATGTGGCAGTTTCACC	3'	Diff	gp3	(((((..(((((.....(((((((((.(((((((((((((..(((((((..((((((((((.......)))))))))...)..))))).))..))))))))))))).))))))))).....)).)))..)))))	91	44	-57.2	1	0	0	14	0	0	0	0	2.5	0	5	2.5	7	0	9	0	9	5.5	8.5	0	9	8.5	5	0	6	2.5	0
17	22	aly-miR167a-5p	TGAAGCTGCCAGCATGATCTA	21						13	aly-MIR167a,ptc-MIR167g,ptc-MIR167f,ptc-MIR167h,ath-MIR167a,mdm-MIR167a,mdm-MIR167h,mdm-MIR167i,mdm-MIR167j,csi-MIR167a,csi-MIR167b,cas-MIR167a,ahy-MIR167,	aly-MIR167a	ggtgcaccggcatctgaTGAAGCTGCCAGCATGATCTAattagctttctttatatctgttgttgtgtttcataacgatggttaagagatgagtctcgattaGATCATGTTCGCAGTTTCACCcgttgactgtcgcacc	aly-miR167a-5p	TGAAGCTGCCAGCATGATCTA	5'	Yes	gp3	(((((..(((((.....(((((((((.((((((((((((((((((((((((.((.(..((((((((...))))))))..).))))))).))).)).)))))))))))))).))))))))).....)).)))..)))))	138	44.2	-59.1	1	24668.8	50539.8	60425.6	13375.4	13160.9	17010.8	31223.9	38388.3	8511.72	13624.5	11300.2	15976.3	19452.7	34955.5	31024.3	7425.93	32073.2	4686.77	33310.1	8955.5	3578.13	6400.43	4430.8	3192.27	2647.22	3561.48
17	23	aly-miR167a-3p	GATCATGTTCGCAGTTTCACC	21						13	aly-MIR167a,ptc-MIR167g,ptc-MIR167f,ptc-MIR167h,ath-MIR167a,mdm-MIR167a,mdm-MIR167h,mdm-MIR167i,mdm-MIR167j,csi-MIR167a,csi-MIR167b,cas-MIR167a,ahy-MIR167,	aly-MIR167a	ggtgcaccggcatctgaTGAAGCTGCCAGCATGATCTAattagctttctttatatctgttgttgtgtttcataacgatggttaagagatgagtctcgattaGATCATGTTCGCAGTTTCACCcgttgactgtcgcacc	aly-miR167a-3p	GATCATGTTCGCAGTTTCACC	3'	Yes	gp3	(((((..(((((.....(((((((((.((((((((((((((((((((((((.((.(..((((((((...))))))))..).))))))).))).)).)))))))))))))).))))))))).....)).)))..)))))	138	44.2	-59.1	1	0	0	14	0	0	0	0	2.5	0	5	2.5	7	0	9	0	9	5.5	8.5	0	9	8.5	5	0	6	2.5	0
18	24	stu-miR167a-5p	TGAAGCTGCCAGCATGATCTA	21						4	stu-MIR167c,aly-MIR167b,csi-MIR167e,cas-MIR167b,	stu-MIR167c	TGAAGCTGCCAGCATGATCTAaacttggccacacttataaagaaaaaaaatgggtgactaaggttaGGTCATGCTCGGACAGCCTCACT	stu-miR167a-5p	TGAAGCTGCCAGCATGATCTA	5'	Yes	gp3	(((.((((((((((((((((((.(((((.(((.((................))))).))))).)))))))))))).)).)))).)))..	89	43.8	-36.9	0.9	24668.8	50539.8	60425.6	13375.4	13160.9	17010.8	31223.9	38388.3	8511.72	13624.5	11300.2	15976.3	19452.7	34955.5	31024.3	7425.93	32073.2	4686.77	33310.1	8955.5	3578.13	6400.43	4430.8	3192.27	2647.22	3561.48
18	25	stu-miR167c-3p_1ss11GT	GGTCATGCTCTGACAGCCTCACT	23						4	stu-MIR167c,aly-MIR167b,csi-MIR167e,cas-MIR167b,	stu-MIR167c	TGAAGCTGCCAGCATGATCTAaacttggccacacttataaagaaaaaaaatgggtgactaaggttaGGTCATGCTCGGACAGCCTCACT	stu-miR167c-3p	GGTCATGCTCGGACAGCCTCACT	3'	Diff	gp3	(((.((((((((((((((((((.(((((.(((.((................))))).))))).)))))))))))).)).)))).)))..	89	43.8	-36.9	0.9	9	17	21	0	0	0	0	6	0	0	0	0	0	0	0	0	0	0	5	0	0	12	6	6	6	0
19	26	aly-miR167c-5p_L+1_1ss21TA	TTAAGCTGCCAGCATGATCTAG	22						3	aly-MIR167c,ath-MIR167c,cas-MIR167c,	aly-MIR167c	cagtagcagtTAAGCTGCCAGCATGATCTTGtcttcctctcttaagtttcatatataatcaagttaatataaagattttgtacaattcttgttcttattatatgatcatagcttagagagagagagactAGGTCATGCTGGTAGTTTCACctgctaatg	aly-miR167c-5p	TAAGCTGCCAGCATGATCTTG	5'	Diff	gp3	((.((((((..((((((((((((((((((.((((..(((((((((((((((((((....((((....((((((...)))))).....)))).......)))))))....))))).)))))))..)))).))))))))))))))))))...)))))).))	159	34.6	-66.7	1.2	12.5	25.5	6.5	0	7	7	5.5	3.5	0	0.833333	2	1.5	0	2	1.5	0	1.75	0	0	0.833333	0	0	0	0	1.25	1.25
20	27	crt-miR168	TCGCTTGGTGCAGGTCGGGAA	21						36	crt-MIR168,mtr-MIR168b,mtr-MIR168c,gma-MIR168b,gma-MIR168a,ptc-MIR168b,ptc-MIR168a,ath-MIR168a,ath-MIR168b,mdm-MIR168a,mdm-MIR168b,lja-MIR168,aly-MIR168a,aly-MIR168b,ppe-MIR168,mes-MIR168a,vvi-MIR168,nta-MIR168b,nta-MIR168c,nta-MIR168a,nta-MIR168d,nta-MIR168e,csi-MIR168,lus-MIR168b,lus-MIR168a,cme-MIR168,sly-MIR168b,sly-MIR168a,bra-MIR168a,bna-MIR168a,bra-MIR168c,bra-MIR168b,bna-MIR168b,rco-MIR16…	crt-MIR168	agttaccggcggtctctaatTCGCTTGGTGCAGGTCGGGAActgattggctagtttttttttgaaattttttgacagcgaggtggcgtgttgtaattggtcgtcacgtttaaattaatgattgaaaaaaatgcgaattggatcccgccttgcatcaactgaatcggagaccgaggtgagagattggatggatatttacctt	crt-miR168	TCGCTTGGTGCAGGTCGGGAA	5'	Yes	gp3	..(((((..(((((((..((((..((((((((((.(((((.(..(((.((..(((((((((....(((..((...((((.(..(((............)))..).))))..))..)))....))))))))))).)))..).))))).))))))))))..))))..))))))).))))).......................	201	42.8	-71.3	0.8	4927.5	6668	8416.5	4596.5	4475	5093.5	6584	5940.5	153.5	3545	2676	3600.5	6565.5	1550.5	8558	2354.5	5701	1117	7838	2150	1379	3673.5	2034.5	1713.5	1921	2212.5
20	28	mtr-miR168c-3p	CCCGCCTTGCATCAACTGAAT	21						36	crt-MIR168,mtr-MIR168b,mtr-MIR168c,gma-MIR168b,gma-MIR168a,ptc-MIR168b,ptc-MIR168a,ath-MIR168a,ath-MIR168b,mdm-MIR168a,mdm-MIR168b,lja-MIR168,aly-MIR168a,aly-MIR168b,ppe-MIR168,mes-MIR168a,vvi-MIR168,nta-MIR168b,nta-MIR168c,nta-MIR168a,nta-MIR168d,nta-MIR168e,csi-MIR168,lus-MIR168b,lus-MIR168a,cme-MIR168,sly-MIR168b,sly-MIR168a,bra-MIR168a,bna-MIR168a,bra-MIR168c,bra-MIR168b,bna-MIR168b,rco-MIR16…	mtr-MIR168c	ctcacttcgcggtctctaatTCGCTTGGTGCAGGTCGGGAAccactacatccgctgttttcgtagaaaccggcggtgaattggatCCCGCCTTGCATCAACTGAATcggaggccgcggtgaatcta	mtr-miR168c-3p	CCCGCCTTGCATCAACTGAAT	3'	Yes	gp3	..(((((..(((((((..((((..((((((((((.(((((.(..(((.((..(((((((((....(((..((...((((.(..(((............)))..).))))..))..)))....))))))))))).)))..).))))).))))))))))..))))..))))))).))))).......................	126	42.8	-71.3	0.8	84.5	173	223.5	67	74	88	173.5	148.5	101.5	59	65	105	86	119.5	164	46	140.5	26	229	47	22	172	104	82	62.5	56.5
21	29	csi-miR168-5p	TCGCTTGGTGCAGGTCGGGAA	21						16	csi-MIR168,mtr-MIR168c,ptc-MIR168a,ptc-MIR168b,ath-MIR168b,ath-MIR168a,lja-MIR168,aly-MIR168b,aly-MIR168a,sly-MIR168b,sly-MIR168a,bra-MIR168a,bna-MIR168a,bra-MIR168c,bra-MIR168b,cas-MIR168,	csi-MIR168	gttaccggcggtctctaatTCGCTTGGTGCAGGTCGGGAActgattggctagttttttttttgaaattttttgacagcgaggtggcgtgttgtaattggtcgtaacgtttaaattaatgattgaaaaaatgcgaattggatCCCGCCTTGCATCAACTGAATcggagaccgaggtga	csi-miR168-5p	TCGCTTGGTGCAGGTCGGGAA	5'	Yes	gp3	.(((((..(((((((..((((..((((((((((.(((((.(..(((.((........................((((((........))))))..(..(((((.............)))))..)......)).)))..).))))).))))))))))..))))..))))))).)))))	177	43.5	-66.1	0.9	4927.5	6668	8416.5	4596.5	4475	5093.5	6584	5940.5	153.5	3545	2676	3600.5	6565.5	1550.5	8558	2354.5	5701	1117	7838	2150	1379	3673.5	2034.5	1713.5	1921	2212.5
21	30	csi-miR168-3p	CCCGCCTTGCATCAACTGAAT	21						16	csi-MIR168,mtr-MIR168c,ptc-MIR168a,ptc-MIR168b,ath-MIR168b,ath-MIR168a,lja-MIR168,aly-MIR168b,aly-MIR168a,sly-MIR168b,sly-MIR168a,bra-MIR168a,bna-MIR168a,bra-MIR168c,bra-MIR168b,cas-MIR168,	csi-MIR168	gttaccggcggtctctaatTCGCTTGGTGCAGGTCGGGAActgattggctagttttttttttgaaattttttgacagcgaggtggcgtgttgtaattggtcgtaacgtttaaattaatgattgaaaaaatgcgaattggatCCCGCCTTGCATCAACTGAATcggagaccgaggtga	csi-miR168-3p	CCCGCCTTGCATCAACTGAAT	3'	Yes	gp3	.(((((..(((((((..((((..((((((((((.(((((.(..(((.((........................((((((........))))))..(..(((((.............)))))..)......)).)))..).))))).))))))))))..))))..))))))).)))))	177	43.5	-66.1	0.9	84.5	173	223.5	67	74	88	173.5	148.5	101.5	59	65	105	86	119.5	164	46	140.5	26	229	47	22	172	104	82	62.5	56.5
22	31	vvi-miR169b_L-2_1ss21GT	AGCCAAGGATGGCTTGCCT	19						2	vvi-MIR169b,vvi-MIR169h,	vvi-MIR169h	agggtggaatTGAGCCAAGGATGGCTTGCCGtcctttgtcactatttgaggcattaactggtcacgcacggagggttatccttgactcctttagctcctct	vvi-miR169b	TGAGCCAAGGATGGCTTGCCG	5'	Diff	gp3	(((((((((.((((((((((((((((..(((((((..((((.(((((((...)))))))..))))..))).))))..)))))))))))))))))))))))))...	101	52.4	-60.3	1.1	38	22	37	0	0	0	33	11	6	0	0	0	5	0	0	7	0	0	13	0	0	7	5	0	0	0
23	32	csi-miR171f-5p	TATTGGCCTGGTTCACTCAGA	21						92	csi-MIR171f,mtr-MIR171d,mtr-MIR171c,mtr-MIR171f,mtr-MIR171a,mtr-MIR171e,mtr-MIR171b,gma-MIR171u,gma-MIR171j,gma-MIR171e,gma-MIR171g,ptc-MIR171e,ptc-MIR171i,ptc-MIR171g,ptc-MIR171h,ptc-MIR171f,ptc-MIR171k,ptc-MIR171d,ptc-MIR171c,ath-MIR171a,ath-MIR170,mdm-MIR171g,mdm-MIR171n,mdm-MIR171o,mdm-MIR171h,mdm-MIR171m,mdm-MIR171e,mdm-MIR171c,lja-MIR171a,lja-MIR171b,stu-MIR171e,stu-MIR171a,stu-MIR171c,aly-…	csi-MIR171f	gtgtgtatatatatgaaagggtagccgtgaTATTGGCCTGGTTCACTCAGAcaaaccggtttatttgcttttattagagcaaagttccaggtttttttgttttggttTGATTGAGCCGTGCCAATATCtcgtttctctttcatttttccaagactcac	csi-miR171f-5p	TATTGGCCTGGTTCACTCAGA	5'	Yes	gp3	(((.((......(((((((((.((.((.(((((((((..((((((.(((((((((((((....((((((((....))))))))...)).)))))..........)))))).))))))..))))))))).)))).))))))))).........)).)))	158	38.6	-57.7	0.9	291	396	529.5	27	39	31.5	7.5	37	3.5	20	4	4	6.5	26	25.5	22	8	0	16.5	0	2.5	2.5	3	0	47	50
23	33	csi-miR171c-3p_1ss1TN	NGATTGAGCCGTGCCAATATC	21						92	csi-MIR171f,mtr-MIR171d,mtr-MIR171c,mtr-MIR171f,mtr-MIR171a,mtr-MIR171e,mtr-MIR171b,gma-MIR171u,gma-MIR171j,gma-MIR171e,gma-MIR171g,ptc-MIR171e,ptc-MIR171i,ptc-MIR171g,ptc-MIR171h,ptc-MIR171f,ptc-MIR171k,ptc-MIR171d,ptc-MIR171c,ath-MIR171a,ath-MIR170,mdm-MIR171g,mdm-MIR171n,mdm-MIR171o,mdm-MIR171h,mdm-MIR171m,mdm-MIR171e,mdm-MIR171c,lja-MIR171a,lja-MIR171b,stu-MIR171e,stu-MIR171a,stu-MIR171c,aly-…	csi-MIR171d	agagctgcaatactgaaatagtcactgcgatattggcccggttcattcagagcttaagcgtttaagctgaatgcttgctggtggacttTGATTGAGCCGTGCCAATATCttagtgcttacttcaaacaccatgcagccc	csi-miR171c-3p	TGATTGAGCCGTGCCAATATC	3'	Diff	gp3	(((.((......(((((((((.((.((.(((((((((..((((((.(((((((((((((....((((((((....))))))))...)).)))))..........)))))).))))))..))))))))).)))).))))))))).........)).)))	158	38.6	-57.7	0.9	207.667	354.167	647.667	15.5	23.75	15.3333	510.5	298.833	76.5	166.75	131.75	186.5	100.5	155.75	266	83.25	288.25	48	395.75	124.75	30.25	463.917	249.5	223	144.333	145.917
24	32	csi-miR171f-5p	TATTGGCCTGGTTCACTCAGA	21						12	csi-MIR171f,gma-MIR171j,ath-MIR170,ath-MIR171a,stu-MIR171c,stu-MIR171a,aly-MIR171a,aly-MIR170,sly-MIR171a,sly-MIR171f,cas-MIR170,cas-MIR171a,	csi-MIR171f	gtgtgtatatatatgaaagggtagccgtgaTATTGGCCTGGTTCACTCAGAcaaaccggtttatttgcttttattagagcaaagttccaggtttttttgttttggttTGATTGAGCCGTGCCAATATCtcgtttctctttcatttttccaagactcac	csi-miR171f-5p	TATTGGCCTGGTTCACTCAGA	5'	Yes	gp3	(((.((......(((((((((.((.((.(((((((((..((((((.(((((((((((((....((((((((....))))))))...)).)))))..........)))))).))))))..))))))))).)))).))))))))).........)).)))	158	38.6	-57.7	0.9	291	396	529.5	27	39	31.5	7.5	37	3.5	20	4	4	6.5	26	25.5	22	8	0	16.5	0	2.5	2.5	3	0	47	50
24	33	csi-miR171c-3p_1ss1TN	NGATTGAGCCGTGCCAATATC	21						12	csi-MIR171f,gma-MIR171j,ath-MIR170,ath-MIR171a,stu-MIR171c,stu-MIR171a,aly-MIR171a,aly-MIR170,sly-MIR171a,sly-MIR171f,cas-MIR170,cas-MIR171a,	csi-MIR171f	gtgtgtatatatatgaaagggtagccgtgaTATTGGCCTGGTTCACTCAGAcaaaccggtttatttgcttttattagagcaaagttccaggtttttttgttttggttTGATTGAGCCGTGCCAATATCtcgtttctctttcatttttccaagactcac	csi-miR171c-3p	TGATTGAGCCGTGCCAATATC	3'	Diff	gp3	(((.((......(((((((((.((.((.(((((((((..((((((.(((((((((((((....((((((((....))))))))...)).)))))..........)))))).))))))..))))))))).)))).))))))))).........)).)))	158	38.6	-57.7	0.9	207.667	354.167	647.667	15.5	23.75	15.3333	510.5	298.833	76.5	166.75	131.75	186.5	100.5	155.75	266	83.25	288.25	48	395.75	124.75	30.25	463.917	249.5	223	144.333	145.917
25	34	aly-miR171c-5p_1ss5AG	AGATGTTGGTGCGGTTCAATC	21						54	aly-MIR171c,gma-MIR171c,gma-MIR171a,gma-MIR171q,gma-MIR171f,gma-MIR171i,gma-MIR171o,gma-MIR171k,gma-MIR171l,ptc-MIR171b,ptc-MIR171a,ath-MIR171c,ath-MIR171b,mdm-MIR171f,mdm-MIR171q,mdm-MIR171k,mdm-MIR171l,mdm-MIR171j,lja-MIR171d,stu-MIR171d,aly-MIR171b,ppe-MIR171b,mes-MIR171c,mes-MIR171b,mes-MIR171f,mes-MIR171e,vvi-MIR171f,nta-MIR171b,csi-MIR171i,csi-MIR171h,csi-MIR171a,lus-MIR171i,cme-MIR171b,cme…	aly-MIR171c	ggacatcgaatacgAGATATTGGTGCGGTTCAATCagaaaactgtactcttttgttttaaagatcggtttgtttgaTTGAGCCGTGCCAATATCACGtgtttaaatagttt	aly-miR171c-5p	AGATATTGGTGCGGTTCAATC	5'	Diff	gp3	.......(((((((.((((((((..(((((((((((((((((((...(((((......))))).)))))).)))))))))))))..)))))))).))))))).........	111	36.9	-50.8	1.2	17.5	24.5	22	0	0	0	0	0	0	0	0	0	0	0	0	0	0	0	0	0	0	0	0	0	4.5	0
26	34	aly-miR171c-5p_1ss5AG	AGATGTTGGTGCGGTTCAATC	21						14	aly-MIR171c,gma-MIR171q,gma-MIR171f,gma-MIR171o,gma-MIR171c,ptc-MIR171a,ath-MIR171c,ath-MIR171b,mdm-MIR171q,mdm-MIR171f,stu-MIR171d,aly-MIR171b,lus-MIR171d,cas-MIR171c,	aly-MIR171c	ggacatcgaatacgAGATATTGGTGCGGTTCAATCagaaaactgtactcttttgttttaaagatcggtttgtttgaTTGAGCCGTGCCAATATCACGtgtttaaatagttt	aly-miR171c-5p	AGATATTGGTGCGGTTCAATC	5'	Diff	gp3	.......(((((((.((((((((..(((((((((((((((((((...(((((......))))).)))))).)))))))))))))..)))))))).))))))).........	111	36.9	-50.8	1.2	17.5	24.5	22	0	0	0	0	0	0	0	0	0	0	0	0	0	0	0	0	0	0	0	0	0	4.5	0
27	35	sly-miR171e_1ss1TN	NTGAGCCGCGTCAATATCTCT	21						14	sly-MIR171e,gma-MIR171m,gma-MIR171t,gma-MIR171p,gma-MIR171n,mdm-MIR171p,mdm-MIR171a,mdm-MIR171b,stu-MIR171b,ppe-MIR171h,mes-MIR171a,csi-MIR171e,csi-MIR171g,ctr-MIR171,	sly-MIR171e	taggaagatatatatagatattgatgcggttcaatctgaaagacatggttagatatgtaattagccttgtaattttggaTTGAGCCGCGTCAATATCTCTcttccta	sly-miR171e	TTGAGCCGCGTCAATATCTCT	3'	Diff	gp3	((((((((.......(((((((((((((((((((((..(((.(((.((((((........)))))).)))..)))..))))))))))))))))))))).))))))))	107	34.6	-52.4	1.4	30	77	284	45	18	14	849.667	376.333	40	207	107	505	348	164	376	108	200	22	389	107	43	1079.67	501.667	446	226	260
28	36	ptc-miR171j_R+1	CGAGCCGAATCAATATCACTC	21						11	ptc-MIR171l,mtr-MIR171g,mtr-MIR171h,gma-MIR171b,gma-MIR171h,ptc-MIR171j,ptc-MIR171m,lja-MIR171c,ppe-MIR171d,mes-MIR171l,csi-MIR171b,	ptc-MIR171m	gaagcagacatggcgtggtattgatccggctcatcttctgtatttgcatcagaagttcttcgctgaagaCGAGCCGAATCAATATCACTcttgtacgcttc	ptc-miR171j	CGAGCCGAATCAATATCACT	3'	Diff	gp3	(((((((((.(((.((.(((((((((((.((((((..((((.((((....))))..)))).((((((....)))))).)))))).))))))))))).))))).)))))))))	112	44.6	-52.5	1.1	28	47	38	13	21	6	2926.5	2356	1036.5	2101.5	1829.5	1749.5	2590.5	1651	2778	1234	3859	750	6898.5	1919	913.5	633.5	364	276	141	131
29	36	ptc-miR171j_R+1	CGAGCCGAATCAATATCACTC	21						5	ptc-MIR171l,ppe-MIR171d,vvi-MIR479,csi-MIR171b,ghr-MIR479,	ptc-MIR171l	ggagaagtagacacggTGTGATATTGGTCCGGCTCATCttctgtgcataagcatctgaagttcttcactcatgaagaCGAGCCGAATCAATATCACTcttgtatgcttcttc	ptc-miR171j	CGAGCCGAATCAATATCACT	3'	Diff	gp3	(((((((((.(((.((.(((((((((((.((((((..((((.((((....))))..)))).((((((....)))))).)))))).))))))))))).))))).)))))))))	112	44.6	-52.5	1.1	28	47	38	13	21	6	2926.5	2356	1036.5	2101.5	1829.5	1749.5	2590.5	1651	2778	1234	3859	750	6898.5	1919	913.5	633.5	364	276	141	131
30	37	nta-miR172d	AGAATCTTGATGATGCTGCAT	21						237	nta-MIR172e,mtr-MIR172c,mtr-MIR172c,mtr-MIR172b,mtr-MIR172b,mtr-MIR172d,mtr-MIR172d,gma-MIR172h,gma-MIR172h,gma-MIR172a,gma-MIR172a,gma-MIR172b,gma-MIR172b,gma-MIR172g,gma-MIR172g,gma-MIR172j,gma-MIR172j,gma-MIR172f,gma-MIR172f,gma-MIR172k,gma-MIR172k,gma-MIR172l,gma-MIR172l,gma-MIR172i,gma-MIR172i,gma-MIR172d,gma-MIR172d,gma-MIR172e,gma-MIR172e,gma-MIR172c,gma-MIR172c,ptc-MIR172a,ptc-MIR172a,ptc…	nta-MIR172e	gtttgcagatgtagcatcatcaagattcacataaaaaacgcatggtgatgagctgatgaaatgacattaatggccaaggcagctttctgaaggtgAGAATCTTGATGATGCTGCATcagcaataaacgactacctgatttatcattatgccattggaacgatacacagataattagcataattcatgtgcaagaatgccacgggtacatggtatggttcaattgatacagtcgttgtttgcgggtgtagcatcatcaagattcacatgaaaaggcaaggtgaaatgaaattaattaagagccatggctttttgaaggtgAGAATCTTGATGATGCTGCATcagcaataa	nta-miR172d	AGAATCTTGATGATGCTGCAT	5'	Yes	gp3	..((((.(((((((((((((((((((((.(((..((((.(((((((..(((..((((...((..(((.....(((....((.(((....))).)).(((((((((((((((((((((.((((..(((((((...(((....)))......((...((((.((((.((........(((((.....))))).....((((...))))..)))))).))))...))....)))))))..)))).))))))))))))))))))))).........)))...)))..))...)))).)))...)))))).).))))....))).))))))))))))))))))))).))))...	349	39	-129.4	1	520.667	734.417	957.333	320.25	302.5	343.833	111.5	73.8333	17.6667	29.6667	54.4167	55.5	125.417	35.75	167.667	41.6667	81.8333	5.66667	159.333	23.6667	24.3333	1467.08	786.5	628.083	225.417	268.917
30	38	mtr-miR172c-5p_L-1R+1	TAGCATCATCAAGATTCACAT	21						237	nta-MIR172e,mtr-MIR172c,mtr-MIR172c,mtr-MIR172b,mtr-MIR172b,mtr-MIR172d,mtr-MIR172d,gma-MIR172h,gma-MIR172h,gma-MIR172a,gma-MIR172a,gma-MIR172b,gma-MIR172b,gma-MIR172g,gma-MIR172g,gma-MIR172j,gma-MIR172j,gma-MIR172f,gma-MIR172f,gma-MIR172k,gma-MIR172k,gma-MIR172l,gma-MIR172l,gma-MIR172i,gma-MIR172i,gma-MIR172d,gma-MIR172d,gma-MIR172e,gma-MIR172e,gma-MIR172c,gma-MIR172c,ptc-MIR172a,ptc-MIR172a,ptc…	mtr-MIR172c	tatttgcagatGTAGCATCATCAAGATTCACAtatgaaagtgcaaatggttttgttggattttgatctgatcgatgcaaatctaagttctccataggtcttttgaactgAGAATCTTGATGATGCTGCATcagccataa	mtr-miR172c-5p	GTAGCATCATCAAGATTCACA	3'	Diff	gp3	..((((.(((((((((((((((((((((.(((..((((.(((((((..(((..((((...((..(((.....(((....((.(((....))).)).(((((((((((((((((((((.((((..(((((((...(((....)))......((...((((.((((.((........(((((.....))))).....((((...))))..)))))).))))...))....)))))))..)))).))))))))))))))))))))).........)))...)))..))...)))).)))...)))))).).))))....))).))))))))))))))))))))).))))...	139	39	-129.4	1	102.75	169	179.667	61.5	59.5	77.5	125.667	40.3333	15	18.6667	21	20.8333	27.5	35.8333	44	22.5	39.6667	5	50.3333	12.5	3	177.333	108	91.6667	23.5	36.3333
31	39	gma-miR172b-5p_L-1R+2	TAGCATCATCAAGATTCACAT	21						27	gma-MIR172a,mtr-MIR172c,mtr-MIR172d,gma-MIR172f,gma-MIR172j,gma-MIR172b,gma-MIR172h,gma-MIR172i,ptc-MIR172b,ptc-MIR172h,ptc-MIR172g,gra-MIR172b,stu-MIR172a,stu-MIR172b,stu-MIR172d,aly-MIR172b,aly-MIR172a,aly-MIR172c,aly-MIR172f,ppe-MIR172a,csi-MIR172b,csi-MIR172c,csi-MIR172d,bra-MIR172d,bna-MIR172b,cas-MIR172a,cas-MIR172c,	gma-MIR172b	ttgacagtcgttgtttgcggatGTAGCATCATCAAGATTCACatgcaaatgaaggtgggtgggactatgatgcaatccaagtgctctgccaatccatcggtctttttgatgtgAGAATCTTGATGATGCTGCATcagccataaacggctttaa	gma-miR172b-5p	GTAGCATCATCAAGATTCAC	5'	Diff	gp3	.....(((((((....((.(((((((((((((((((((((...(((....)))(((..(((.(((.((.....(((.......))).)).))).))).))).(((.((.....)).))).))))))))))))))))))))).))....)))))))....	153	46.5	-65.3	0.9	102.75	169	179.667	61.5	59.5	77.5	125.667	40.3333	15	18.6667	21	20.8333	27.5	35.8333	44	22.5	39.6667	5	50.3333	12.5	3	177.333	108	91.6667	23.5	36.3333
31	40	gma-miR172a	AGAATCTTGATGATGCTGCAT	21						27	gma-MIR172a,mtr-MIR172c,mtr-MIR172d,gma-MIR172f,gma-MIR172j,gma-MIR172b,gma-MIR172h,gma-MIR172i,ptc-MIR172b,ptc-MIR172h,ptc-MIR172g,gra-MIR172b,stu-MIR172a,stu-MIR172b,stu-MIR172d,aly-MIR172b,aly-MIR172a,aly-MIR172c,aly-MIR172f,ppe-MIR172a,csi-MIR172b,csi-MIR172c,csi-MIR172d,bra-MIR172d,bna-MIR172b,cas-MIR172a,cas-MIR172c,	gma-MIR172h	gcaggtGCAGCAGCATCAAGATTCACAcacagatttacctccttgggggcgtgtgtttcggtgctgAGAATCTTGATGATGCTGCATcagc	gma-miR172a	AGAATCTTGATGATGCTGCAT	3'	Yes	gp3	.....(((((((....((.(((((((((((((((((((((...(((....)))(((..(((.(((.((.....(((.......))).)).))).))).))).(((.((.....)).))).))))))))))))))))))))).))....)))))))....	91	46.5	-65.3	0.9	520.667	734.417	957.333	320.25	302.5	343.833	111.5	73.8333	17.6667	29.6667	54.4167	55.5	125.417	35.75	167.667	41.6667	81.8333	5.66667	159.333	23.6667	24.3333	1467.08	786.5	628.083	225.417	268.917
32	41	stu-miR172a-3p	AGAATCTTGATGATGCTGCAT	21						5	stu-MIR172e,ath-MIR172d,aly-MIR172d,bra-MIR172c,cas-MIR172d,	stu-MIR172e	GCAACATCATCAAGATTCACAtaaaatagaaataatgtggagtagaaaaaaaaataaagttgcttctaaattatgtctccatattattatttttttgaaaatgAGAATCTTGATGATGCTGCAT	stu-miR172a-3p	AGAATCTTGATGATGCTGCAT	3'	Yes	gp3	(((.((((((((((((((.(((((((....(((((((((((((((((..((........))..)))))........))))))))))))....))))....))).)))))))))))))).)))..	124	25.8	-40.2	1.3	520.667	734.417	957.333	320.25	302.5	343.833	111.5	73.8333	17.6667	29.6667	54.4167	55.5	125.417	35.75	167.667	41.6667	81.8333	5.66667	159.333	23.6667	24.3333	1467.08	786.5	628.083	225.417	268.917
33	42	mdm-miR319b-5p_L+1_1ss8TC	TGAGCTTCCTTCAGTCCACTC	21						16	mdm-MIR319g,mtr-MIR319a,mtr-MIR319d,mdm-MIR319e,mdm-MIR319f,mdm-MIR319b,mdm-MIR319h,mdm-MIR319c,stu-MIR319a,aly-MIR319a,aly-MIR319b,csi-MIR159c,sly-MIR319c,bra-MIR319,cas-MIR319a,cas-MIR319b,	mdm-MIR319b	gcagtggtgaagaGAGCTTTCTTCAGTCCACTCatgggtggcggtaggatttaattagctgccgagtcattcatccaaatactgggttattagtaggatgacatccagtaaatgtgtgaatgaagcgggagacaaattggatcttaagcttcctgtacTTGGACTGAAGGGAGCTCCCTtaattaattacttc	mdm-miR319b-5p	GAGCTTTCTTCAGTCCACTC	5'	Diff	gp3	.........((((((((.((.((((...(((((((..((((((((............((((((((..(((.(((((..((((((((((..((((((..((.((((((..((((....((.(((..(((((((..((....(((((((((...........)))))))))....))..)))))))..))).))......)))).))))))))..))))))..))))))))))..))))).)))..)))))))).......))))))))..))...))))).))))))))))))))..............	193	37	-102.5	0.9	33	54	53	155	147	151	186	227	113	177	105.5	254.5	181	205	344	117	213.5	59	364	112	52	1208.5	701	531.5	585.5	693
33	43	mdm-miR319a_R-1	TTGGACTGAAGGGAGCTCCC	20						16	mdm-MIR319g,mtr-MIR319a,mtr-MIR319d,mdm-MIR319e,mdm-MIR319f,mdm-MIR319b,mdm-MIR319h,mdm-MIR319c,stu-MIR319a,aly-MIR319a,aly-MIR319b,csi-MIR159c,sly-MIR319c,bra-MIR319,cas-MIR319a,cas-MIR319b,	mdm-MIR319b	gcagtggtgaagaGAGCTTTCTTCAGTCCACTCatgggtggcggtaggatttaattagctgccgagtcattcatccaaatactgggttattagtaggatgacatccagtaaatgtgtgaatgaagcgggagacaaattggatcttaagcttcctgtacTTGGACTGAAGGGAGCTCCCTtaattaattacttc	mdm-miR319a	TTGGACTGAAGGGAGCTCCCT	3'	Diff	gp3	.........((((((((.((.((((...(((((((..((((((((............((((((((..(((.(((((..((((((((((..((((((..((.((((((..((((....((.(((..(((((((..((....(((((((((...........)))))))))....))..)))))))..))).))......)))).))))))))..))))))..))))))))))..))))).)))..)))))))).......))))))))..))...))))).))))))))))))))..............	193	37	-102.5	0.9	813.5	967.5	1243.5	1328.5	1384.67	1425.5	2715.83	4521.33	441	3127.83	1990.67	3091.67	3610.5	9370.92	4784.83	2027.5	3204.58	1204.5	5736.17	1404.33	1017.17	25219.2	17111.5	11061.4	10282.1	10668.3
34	44	vvi-miR319b_R-1	TTGGACTGAAGGGAGCTCCC	20						74	vvi-MIR319b,mtr-MIR319c,mtr-MIR319a,mtr-MIR319b,mtr-MIR319d,gma-MIR319a,gma-MIR319j,gma-MIR319b,gma-MIR319h,gma-MIR319k,gma-MIR319e,gma-MIR319m,gma-MIR319q,gma-MIR319g,gma-MIR319l,gma-MIR319p,gma-MIR319c,ptc-MIR319b,ptc-MIR319d,ptc-MIR319c,ptc-MIR319a,ptc-MIR319h,ptc-MIR319e,ptc-MIR319i,ath-MIR319a,ath-MIR319b,ath-MIR319c,mdm-MIR319b,mdm-MIR319e,mdm-MIR319f,mdm-MIR319g,mdm-MIR319a,stu-MIR319a,stu…	vvi-MIR319f	agtggtttaagagagcttccttcagtccactcatggatgggttaggggtttggattagctgccgactcattcattcaaacacagtagaatggaaatggagtttactactgtgaatgtgtgaatgatgcgggaggtaaatttcatccttttcttgtctgtgcTTGGACTGAAGGGAGCTCCCTtctactgtttt	vvi-miR319b	TTGGACTGAAGGGAGCTCCCT	3'	Diff	gp3	.((((((...(((((((((((((((((((..((.((((((..((..(((((.(((..(((.(((..((((((..(((((((..((((.(((.............)))))))..)))))))..))))))..))).)))..))))))))..)))))))).))..)))))))))))))))))))......)))))).	193	49.5	-102.2	1.1	813.5	967.5	1243.5	1328.5	1384.67	1425.5	2715.83	4521.33	441	3127.83	1990.67	3091.67	3610.5	9370.92	4784.83	2027.5	3204.58	1204.5	5736.17	1404.33	1017.17	25219.2	17111.5	11061.4	10282.1	10668.3
35	45	ath-miR390a-5p	AAGCTCAGGAGGGATAGCGCC	21						58	ath-MIR390b,mtr-MIR390,gma-MIR390e,gma-MIR390c,gma-MIR390g,gma-MIR390a,gma-MIR390f,gma-MIR390b,gma-MIR390d,ptc-MIR390c,ptc-MIR390d,ptc-MIR390a,ptc-MIR390b,ath-MIR390a,mdm-MIR390d,mdm-MIR390a,mdm-MIR390b,mdm-MIR390c,mdm-MIR390e,mdm-MIR390f,lja-MIR390a,lja-MIR390b,stu-MIR390,aly-MIR390b,aly-MIR390a,ppe-MIR390,mes-MIR390,mes-MIR390b,vvi-MIR390,nta-MIR390b,nta-MIR390c,nta-MIR390a,csi-MIR390b,csi-MIR3…	ath-MIR390a	gtagagaagaatctgtaAAGCTCAGGAGGGATAGCGCCatgatgatcacattcgttatctattttttggCGCTATCCATCCTGAGTTTCAttggctcttcttactac	ath-miR390a-5p	AAGCTCAGGAGGGATAGCGCC	5'	Yes	gp3	(((((..((((((..(((((((((.(((((((((((.((....)).(((((((((((.........))))))).))))......))))))))))).)))))))))..))))))..)))))	107	44.2	-58.2	1.1	477	670	798	33	10	17	1602	2534	532	2477	1990	1990	2779	2058	3764	1769	2956	418	4086	711	601	5723	3393	2641	1952	2067
35	46	gma-miR390a-3p_R+1_1ss8CT	CGCTATCTATCCTGAGTTTCA	21						58	ath-MIR390b,mtr-MIR390,gma-MIR390e,gma-MIR390c,gma-MIR390g,gma-MIR390a,gma-MIR390f,gma-MIR390b,gma-MIR390d,ptc-MIR390c,ptc-MIR390d,ptc-MIR390a,ptc-MIR390b,ath-MIR390a,mdm-MIR390d,mdm-MIR390a,mdm-MIR390b,mdm-MIR390c,mdm-MIR390e,mdm-MIR390f,lja-MIR390a,lja-MIR390b,stu-MIR390,aly-MIR390b,aly-MIR390a,ppe-MIR390,mes-MIR390,mes-MIR390b,vvi-MIR390,nta-MIR390b,nta-MIR390c,nta-MIR390a,csi-MIR390b,csi-MIR3…	gma-MIR390a	agaatctgtaAAGCTCAGGAGGGATAGCGCCatggatgatcttctcttcactcttgatcttctcttgCGCTATCCATCCTGAGTTTCatggcttctatcttcaca	gma-miR390a-3p	CGCTATCCATCCTGAGTTTC	3'	Diff	gp3	(((((..((((((..(((((((((.(((((((((((.((....)).(((((((((((.........))))))).))))......))))))))))).)))))))))..))))))..)))))	105	44.2	-58.2	1.1	24	25	55	7	5	0	78	150	113	73	86	109	156	181	158	22	120	13	202	40	7	102	72	58	31	44
36	47	gma-miR393a	TCCAAAGGGATCGCATTGATC	21						52	gma-MIR393a,mtr-MIR393a,mtr-MIR393b,gma-MIR393j,gma-MIR393k,gma-MIR393e,gma-MIR393g,gma-MIR393f,gma-MIR393h,gma-MIR393d,gma-MIR393i,gma-MIR393c,ptc-MIR393b,ptc-MIR393c,ptc-MIR393a,ath-MIR393a,ath-MIR393b,mdm-MIR393b,mdm-MIR393c,mdm-MIR393d,mdm-MIR393e,mdm-MIR393a,mdm-MIR393f,stu-MIR393,aly-MIR393b,aly-MIR393a,ppe-MIR393b,ppe-MIR393a,mes-MIR393c,mes-MIR393d,mes-MIR393b,mes-MIR393a,vvi-MIR393a,vvi-…	gma-MIR393c	ggaggaggcaTCCAAAGGGATCGCATTGATCccaaatttcagatttataaatttttctctttccctccccttctcaataTTTGGGATCATGCTATCCCTTtggattcctcctt	gma-miR393a	TCCAAAGGGATCGCATTGATC	5'	Yes	gp3	.((((((..((((((((((((.((((.((((((((((..((.....((((((....................))))))..))..)))))))))))))).))))))))))))..)))))).	119	39.2	-48.3	1	115.75	168.5	221.417	93.25	87.5	84.5	35	50.75	13.75	41.75	35.25	61.9167	64.5	14.5	110.75	34.25	93	4	144.75	17.25	18.75	244.75	127.75	94.8333	41.75	42.75
36	48	ptc-miR393a-3p	ATCATGCTATCCCTTTGGATT	21						52	gma-MIR393a,mtr-MIR393a,mtr-MIR393b,gma-MIR393j,gma-MIR393k,gma-MIR393e,gma-MIR393g,gma-MIR393f,gma-MIR393h,gma-MIR393d,gma-MIR393i,gma-MIR393c,ptc-MIR393b,ptc-MIR393c,ptc-MIR393a,ath-MIR393a,ath-MIR393b,mdm-MIR393b,mdm-MIR393c,mdm-MIR393d,mdm-MIR393e,mdm-MIR393a,mdm-MIR393f,stu-MIR393,aly-MIR393b,aly-MIR393a,ppe-MIR393b,ppe-MIR393a,mes-MIR393c,mes-MIR393d,mes-MIR393b,mes-MIR393a,vvi-MIR393a,vvi-…	ptc-MIR393a	agaggaggcaTCCAAAGGGATCGCATTGATCccaagtgtctgtcccccataattttggATCATGCTATCCCTTTGGATTcctcct	ptc-miR393a-3p	ATCATGCTATCCCTTTGGATT	3'	Yes	gp3	.((((((..((((((((((((.((((.((((((((((..((.....((((((....................))))))..))..)))))))))))))).))))))))))))..)))))).	85	39.2	-48.3	1	11.3333	23.6667	25.3333	7	11	8.66667	6.66667	7.66667	0	4	2.33333	9	12.6667	3.66667	18.3333	1.66667	7.66667	0	5.33333	2	2.33333	12	5.33333	8	5	3.33333
37	47	gma-miR393a	TCCAAAGGGATCGCATTGATC	21						7	gma-MIR393a,mtr-MIR393b,gma-MIR393f,gma-MIR393d,gma-MIR393c,gma-MIR393e,gma-MIR393g,	gma-MIR393g	agaggaggcaTCCAAAGGGATCGCATTGATCccaaatccaagcttcaatgttcttctctctttctcactcaaaatgttaattttaTTTGGGATCATGCTATCCCTTtggatgtctcctt	gma-miR393a	TCCAAAGGGATCGCATTGATC	5'	Yes	gp3	.((((((..((((((((((((.((((.((((((((((..((.....((((((....................))))))..))..)))))))))))))).))))))))))))..)))))).	119	39.2	-48.3	1	115.75	168.5	221.417	93.25	87.5	84.5	35	50.75	13.75	41.75	35.25	61.9167	64.5	14.5	110.75	34.25	93	4	144.75	17.25	18.75	244.75	127.75	94.8333	41.75	42.75
38	49	ptc-miR393a-5p	TCCAAAGGGATCGCATTGATC	21						10	mdm-MIR393g,ptc-MIR393b,ptc-MIR393a,ath-MIR393a,ath-MIR393b,mdm-MIR393h,aly-MIR393b,aly-MIR393a,csi-MIR393c,cas-MIR393,	ptc-MIR393a	agaggaggcaTCCAAAGGGATCGCATTGATCccaagtgtctgtcccccataattttggATCATGCTATCCCTTTGGATTcctcct	ptc-miR393a-5p	TCCAAAGGGATCGCATTGATC	5'	Yes	gp3	......((..(((((((((..((((((((((((.((((.(((((.(((((((..............).)))))).))))))))).))))))))))))..)))))))))..)).....	85	42.7	-53.4	1.1	115.75	168.5	221.417	93.25	87.5	84.5	35	50.75	13.75	41.75	35.25	61.9167	64.5	14.5	110.75	34.25	93	4	144.75	17.25	18.75	244.75	127.75	94.8333	41.75	42.75
38	50	mdm-miR393g	ATCATGCTATCCCTTTGGATT	21						10	mdm-MIR393g,ptc-MIR393b,ptc-MIR393a,ath-MIR393a,ath-MIR393b,mdm-MIR393h,aly-MIR393b,aly-MIR393a,csi-MIR393c,cas-MIR393,	mdm-MIR393h	ttaattgcttctagaggaggcatccaaagggatcgcattgatcccagctaactatttatgtccatcgcttggtttggATCATGCTATCCCTTTGGATTtctcctttggaagcttcaa	mdm-miR393g	ATCATGCTATCCCTTTGGATT	3'	Yes	gp3	......((..(((((((((..((((((((((((.((((.(((((.(((((((..............).)))))).))))))))).))))))))))))..)))))))))..)).....	117	42.7	-53.4	1.1	11.3333	23.6667	25.3333	7	11	8.66667	6.66667	7.66667	0	4	2.33333	9	12.6667	3.66667	18.3333	1.66667	7.66667	0	5.33333	2	2.33333	12	5.33333	8	5	3.33333
39	51	stu-miR393-5p_R-1	TCCAAAGGGATCGCATTGATC	21						3	sly-MIR393,stu-MIR393,csi-MIR393b,	stu-MIR393	TCCAAAGGGATCGCATTGATCCtgtgtcccaaattaattaactggggtctatgggATCATGCGATCTCTTCGGAAT	stu-miR393-5p	TCCAAAGGGATCGCATTGATCC	5'	Diff	gp3	...(((((.((((((((((((.(((((..(((((((.............)))))).)..))))))))))))))))).))))).....	76	41.4	-40.9	1.1	115.75	168.5	221.417	93.25	87.5	84.5	35	50.75	13.75	41.75	35.25	61.9167	64.5	14.5	110.75	34.25	93	4	144.75	17.25	18.75	244.75	127.75	94.8333	41.75	42.75
40	52	mdm-miR395a	CTGAAGTGTTTGGGGGAACTC	21						3	mdm-MIR395d,mdm-MIR395g,mdm-MIR395i,	mdm-MIR395i	tcaggtgtcaccaagaGTTCCCTTGACCACTTCATTGggaaatagtctcttttgcaactaaatatcctaCTGAAGTGTTTGGGGGAACTCccggcggcatttga	mdm-miR395a	CTGAAGTGTTTGGGGGAACTC	3'	Yes	gp3	((((..((...((..(((((((((..(.((((((..(((((((((.(((..((((.((.((........))..)).))))..)))))..))))))).(((....))).)))))).)..)))))))))..))...))..))))	104	46.5	-53.3	0.8	0	8	8	0	0	0	9	0	0	0	0	0	0	0	0	0	0	0	0	0	0	0	0	0	0	0
41	53	gma-miR396a-5p	TTCCACAGCTTTCTTGAACTG	21						85	gma-MIR396a,mtr-MIR396b,mtr-MIR396a,gma-MIR396h,gma-MIR396i,gma-MIR396e,gma-MIR396b,gma-MIR396d,gma-MIR396f,gma-MIR396c,gma-MIR396k,gma-MIR396g,ptc-MIR396b,ptc-MIR396a,ptc-MIR396d,ptc-MIR396e,ptc-MIR396c,ptc-MIR396f,ptc-MIR396g,ath-MIR396a,ath-MIR396b,mdm-MIR396b,mdm-MIR396d,mdm-MIR396e,mdm-MIR396c,mdm-MIR396g,mdm-MIR396f,mdm-MIR396a,lja-MIR396,stu-MIR396,aly-MIR396a,aly-MIR396b,ppe-MIR396b,ppe-M…	gma-MIR396e	gtgatcTTCCACAGCTTTCTTGAACTGtgttgtgaggcttctctccaatgaaggtttataccctatgcaaaagaaattctatgagcacaATTCAAGATAGCTGTGGAAAAtcac	gma-miR396a-5p	TTCCACAGCTTTCTTGAACTG	5'	Yes	gp3	...(((((((.(((((((..((((((((((((.((((((((((....((((((.((...(((....)))...)).)))))).....(((...)))...)))))))))).))))))))))))..))))))).)))))))..	114	43.6	-61.7	1	36152.3	44995.7	56190.7	15974	15816.8	15426.8	91069.7	80878.2	3447.17	90001.7	60199.2	140099	109909	20952.5	125584	53480.5	91508.2	12261	146742	43914	25132.8	146560	88973.7	68783.7	34950.3	35433.2
41	54	gma-miR396a-3p_L+1	GTTCAATAAAGCTGTGGGAAG	21						85	gma-MIR396a,mtr-MIR396b,mtr-MIR396a,gma-MIR396h,gma-MIR396i,gma-MIR396e,gma-MIR396b,gma-MIR396d,gma-MIR396f,gma-MIR396c,gma-MIR396k,gma-MIR396g,ptc-MIR396b,ptc-MIR396a,ptc-MIR396d,ptc-MIR396e,ptc-MIR396c,ptc-MIR396f,ptc-MIR396g,ath-MIR396a,ath-MIR396b,mdm-MIR396b,mdm-MIR396d,mdm-MIR396e,mdm-MIR396c,mdm-MIR396g,mdm-MIR396f,mdm-MIR396a,lja-MIR396,stu-MIR396,aly-MIR396a,aly-MIR396b,ppe-MIR396b,ppe-M…	gma-MIR396i	tggccctctttgtattcTTCCACAGCTTTCTTGAACTGcatccatagagttcctttgcatgcatgccaaggcactcttgctcccacaccttgttttgcggTTCAATAAAGCTGTGGGAAGatacagatagggtca	gma-miR396a-3p	TTCAATAAAGCTGTGGGAAG	3'	Diff	gp3	...(((((((.(((((((..((((((((((((.((((((((((....((((((.((...(((....)))...)).)))))).....(((...)))...)))))))))).))))))))))))..))))))).)))))))..	135	43.6	-61.7	1	63	131	151	56	58	49	252	140	29	147	95	187	113	77	157	62	156	25	257	47	39	613	376	272	157	168
42	55	csi-miR396f-5p	TTCCACAGCTTTCTTGAACTT	21						2	csi-MIR396c,csi-MIR396d,	csi-MIR396c	catgtttTTCCACAGCTTTCTTGAACTTctttctttcttcttcttcttcttcttcttcttcttcttcttcttcttcttctttttctaataataggctacgatttgatgtggctagctgcagctattagaagTTCAAGAAATCTGTGGGAAGaaatggcaaa	csi-miR396f-5p	TTCCACAGCTTTCTTGAACTT	5'	Yes	gp3	(((.(((((((((((.((((((((((((((...............................................................(((((((......)))))))(((....)))...)))))))))))))).))))))))))).))).....	161	35.4	-45	0.8	16693.7	24770.2	30645.7	5943.5	6080.83	6006.33	21472	15045.7	2018.17	10225.7	6826.67	13822.5	15065.7	5946.5	18631.7	5083	13253.5	2042.5	22149.8	7581	3982	46218.2	27773.7	21269.2	8156.83	9058.67
42	56	csi-miR396c_L-1_1ss10TG	TCAAGAAAGCTGTGGGAAG	19						2	csi-MIR396c,csi-MIR396d,	csi-MIR396d	catcgaaagcaccgtttgcccagccatggccacagctttcttgaacttctttccttcttcttcttctctaattataggctactatttgatgtggctagctgcagctatcagaagTTCAAGAAATCTGTGGGAAGaaatggcaaataagggcttaatttctcctt	csi-miR396c	TTCAAGAAATCTGTGGGAAG	3'	Diff	gp3	(((.(((((((((((.((((((((((((((...............................................................(((((((......)))))))(((....)))...)))))))))))))).))))))))))).))).....	164	35.4	-45	0.8	0	0	3	0	0	0	0	0	0	0	0	0	0	0	0	0	0	0	0	0	0	0	0	0	0	0
43	57	csi-miR396a-5p	TTCCACAGCTTTCTTGAACTG	21						4	csi-MIR396a,gma-MIR396h,gma-MIR396e,gma-MIR396j,	csi-MIR396a	cgaaggtcctctttgtgatcTTCCACAGCTTTCTTGAACTGtcttgaattttccgatcgataccggtgcatgattaattcccaacacaATTCAAGAAAGCTGTGGAAAActactaagaggatttggtcatcaatctctcttttgatagagatc	csi-miR396a-5p	TTCCACAGCTTTCTTGAACTG	5'	Yes	gp3	.((..((((((((.(((...((((((((((((((((((.(((.(((......(((........))).....((.....)).))).))).))))))))))))))))))...))).))))))))....)).......(((((......)))))..	153	39.9	-53.4	0.9	36152.3	44995.7	56190.7	15974	15816.8	15426.8	91069.7	80878.2	3447.17	90001.7	60199.2	140099	109909	20952.5	125584	53480.5	91508.2	12261	146742	43914	25132.8	146560	88973.7	68783.7	34950.3	35433.2
44	58	hbr-miR396a_R-3	CACAGCTTTCTTGAACTT	18						2	hbr-MIR396a,stu-MIR408b,	hbr-MIR396a	CACAGCTTTCTTGAACTTTCTtgtacttattcttttgatctctatagattgaataggtagcaccttggaagctcaagaaagctgtg	hbr-miR396a	CACAGCTTTCTTGAACTTTCT	5'	Diff	gp3	((((((((((((((.(((((.(((((((((((....(((((....))))))))))))).)))....))))).))))))))))))))	86	37.2	-36	1.1	54.3333	28.6667	48	13.3333	11.6667	7	31.3333	5.66667	0	19.3333	8.66667	12.6667	20	4	10.3333	8.33333	11	4.33333	21.6667	13.6667	11	39.3333	15.3333	14.6667	12.6667	8
45	59	nta-miR397_L+2R-1_1ss21GT	TAATTGAGTGCAGCGTTGATT	21						22	nta-MIR397,mtr-MIR397,gma-MIR397a,gma-MIR397b,ptc-MIR397a,ath-MIR397a,lja-MIR397,aly-MIR397a,aly-MIR397b,ppe-MIR397,mes-MIR397b,vvi-MIR397a,csi-MIR397,lus-MIR397b,lus-MIR397a,cme-MIR397,sly-MIR397,bna-MIR397a,bna-MIR397b,cas-MIR397,rco-MIR397,ssl-MIR397,	nta-MIR397	tagaaacatcATTGAGTGCAGCGTTGATGTcaatttctgtgaagtctttaatttggcatttggtctttttgccactttttccaattcgttgtcatctgcgctgcactcaatcatgtttttag	nta-miR397	ATTGAGTGCAGCGTTGATGT	5'	Diff	gp3	(((((((((.(((((((((((((..((((.((((......(((......((..(((((...........)))))..))......))))))).))))..))))))))))))).))))))))).	122	37.7	-48	1	8	7	10	0	0	0	5	6	0	11	18	50	0	0	5	0	0	8	16	0	0	0	0	0	6	5
46	60	mes-miR398	TGTGTTCTCAGGTCGCCCCTG	21						48	mes-MIR398,mtr-MIR398c,mtr-MIR398b,mtr-MIR398a,gma-MIR398c,gma-MIR398d,gma-MIR398a,gma-MIR398b,ptc-MIR398b,ptc-MIR398c,ptc-MIR398a,ath-MIR398c,ath-MIR398a,ath-MIR398b,mdm-MIR398c,mdm-MIR398b,mdm-MIR398a,lja-MIR398,gra-MIR398,stu-MIR398b,aly-MIR398b,aly-MIR398a,ppe-MIR398a,vvi-MIR398c,vvi-MIR398b,vvi-MIR398a,nta-MIR398,csi-MIR398b,csi-MIR398a,lus-MIR398a,lus-MIR398b,lus-MIR398e,lus-MIR398d,lus-MIR…	mes-MIR398	tttgaaaatgtggaggattcctacaggagcgacctgagatcacatgtggacaccctaagatcttcccttatcttccaaggattgtgttcttaTGTGTTCTCAGGTCGCCCCTGccgggcttcctccgccacttgatga	mes-miR398	TGTGTTCTCAGGTCGCCCCTG	3'	Yes	gp3	.........((((((((..(((.((((.(((((((((((.(((((..((((((((((((((........)))))...)))...))))))..))))).))))))))))).))))..)))..))))))))..........	138	50	-65.5	0.9	3876.83	4965.33	6600.17	2908.08	3290.5	3393.58	98.3333	104.417	13	161.417	190.167	610	47.3333	7.33333	185.667	45	223.75	30.3333	292.083	34.1667	29.5	15.3333	7	7.33333	278.583	306.583
47	61	ppe-miR398b_L-1	GTGTTCTCAGGTCGCCCCTG	20						4	ppe-MIR398b,stu-MIR398a,lus-MIR398f,sly-MIR398a,	ppe-MIR398b	tggagccccacaggggtgacctgagatcacatgtatgtggcaacagcagaacccaagagggccatcgttcggtcctgctgttctttgcattccaCGTGTTCTCAGGTCGCCCCTGcagggctttc	ppe-miR398b	CGTGTTCTCAGGTCGCCCCTG	3'	Diff	gp3	..((((((..((((((((((((((((.(((.((.(((..(.((((((((.(((...((......))....))).))))))))..)..)))..)).))).))))))))))))))))..))))))..	125	57.6	-71	1	70.75	76	123.5	57.25	52.75	42.75	7	12.25	6	9.25	14.5	9	0	0	3	0	2.25	0	3.25	0	0	0	0	0	3.75	1.25
48	62	ppe-miR398a-3p	TGTGTTCTCAGGTCGCCCCTG	21						3	ppe-MIR398a,ptc-MIR398c,hbr-MIR398,	ppe-MIR398a	agaggggttccacaGGAGCGACCTGGGATCACATGcgtccaccctcacattaacacaatgtgctgcattgctagtgtattgtgctcgaTGTGTTCTCAGGTCGCCCCTGcagtaccttc	ppe-miR398a-3p	TGTGTTCTCAGGTCGCCCCTG	3'	Yes	gp3	.(((((......((((.(((((((((((.(((((.((..(((....((((((...(((((.....))))).))))))...)))..))))))).))))))))))).)))).....)))))	119	53.8	-52.9	0.8	3876.83	4965.33	6600.17	2908.08	3290.5	3393.58	98.3333	104.417	13	161.417	190.167	610	47.3333	7.33333	185.667	45	223.75	30.3333	292.083	34.1667	29.5	15.3333	7	7.33333	278.583	306.583
49	63	aqc-miR399	TGCCAAAGGAGAGTTGCCCTA	21						21	aqc-MIR399,mtr-MIR399d,ptc-MIR399i,mdm-MIR399d,mdm-MIR399k,mdm-MIR399i,stu-MIR399i,ppe-MIR399d,ppe-MIR399j,ppe-MIR399c,ppe-MIR399h,ppe-MIR399l,ppe-MIR399e,ppe-MIR399g,vvi-MIR399b,csi-MIR399b,cme-MIR399b,cme-MIR399d,cme-MIR399e,cme-MIR399g,sly-MIR399,	aqc-MIR399	gtcgtagggcttctccctgttggcagatgataatggcttagttctttcctgatcgagtgcctttaattatcTGCCAAAGGAGAGTTGCCCTAtgacta	aqc-miR399	TGCCAAAGGAGAGTTGCCCTA	3'	Yes	gp3	((((((((((..((((((.((((((((((((((.(((.....((......))......))).)).))))))))))))))).)))..))))))))))..	98	45.9	-49.3	1.1	8	18	23.5	18.5	14.5	23.5	18.5	36.5	5	0	13.5	25	55.5	6	74.5	0	12.5	0	20	42.5	0	15	0	0	15	16
50	64	aly-miR399e-3p	TGCCAAAGGAGATTTGCCTCG	21						3	aly-MIR399e,ath-MIR399e,mes-MIR399b,	aly-MIR399e	agtgagagaggaaaacagagattatgttttggtagaaagcattacaGGGCGAATCCTCTATTGGCAGGggaagttgatgagtgttgatcactcttatattttctcatcattttcctcTGCCAAAGGAGATTTGCCTCGcaatgcttccctaccgttatggcgttattcatttctccaatgtccaatctact	aly-miR399e-3p	TGCCAAAGGAGATTTGCCTCG	3'	Yes	gp3	(((.(((..(((.....((((..((((..((((((.(((((((...(((((((((..((.((((((((((((..(((((((.....................)))))))..))))))))))))))..)))))))))...)))))))..)))))).....))))........)))).....)))..))))))	191	41.4	-70.9	0.9	6	0	6	0	0	0	0	0	0	0	0	0	0	0	0	0	0	0	0	0	0	0	0	0	0	0
51	65	csi-miR403a-3p_R+1_2ss20CT21GT	TTAGATTCACGCACAAACTTTT	22						4	csi-MIR403a,gma-MIR403b,gma-MIR403a,mes-MIR403b,	csi-MIR403a	gaggCATGTTTCGGGTTTGTGCGTGaatttaataaaataaccgcttcttttaatctcgttcccccattttttgttagtaacaaatttttgccgtcagtgTTAGATTCACGCACAAACTCGtgacgtgtct	csi-miR403a-3p	TTAGATTCACGCACAAACTCG	3'	Diff	gp3	.((((((((..(((((((((((((((((((((((.....((.((.........................((((((...)))))).....)).))...)))))))))))))))))))))))..))))))))	130	39.2	-46.8	0.9	0	0	0	0	0	0	0	0	23	0	0	0	0	0	0	0	0	0	0	0	0	0	0	0	0	0
52	66	mdm-miR408b_1ss8AC	ACAGGGACGAGGTAGAGCATG	21						23	mdm-MIR408a,mtr-MIR408,gma-MIR408c,gma-MIR408a,gma-MIR408b,gma-MIR408d,ptc-MIR408,ath-MIR408,stu-MIR408b,aly-MIR408,mes-MIR408,vvi-MIR408,nta-MIR408,csi-MIR408,lus-MIR408a,cme-MIR408,cas-MIR408,cpa-MIR408,rco-MIR408,cca-MIR408,ahy-MIR408,vun-MIR408,dpr-MIR408,	mdm-MIR408a	ggaaagagagttaataagACAGGGAAGAGGTAGAGCATGgatggagttctcaagagcaaaatagagctcttgtgactctactcATGCACTGCCTCTTCCCTGGCtttgcctccctctccttcc	mdm-miR408b	ACAGGGAAGAGGTAGAGCATG	5'	Diff	gp3	((((.(((((.....(((.((((((((((((((.(((((..(((((((..(((((((........))))))).)))))))..))))).)))))))))))))).))).......))))).))))	123	48.8	-70.1	1.2	0	0	0	0	0	0	0	6	4	7	5	0	0	0	0	0	0	0	0	0	0	0	0	0	0	0
52	67	mdm-miR408a_L-1R+1	TGCACTGCCTCTTCCCTGGCT	21						23	mdm-MIR408a,mtr-MIR408,gma-MIR408c,gma-MIR408a,gma-MIR408b,gma-MIR408d,ptc-MIR408,ath-MIR408,stu-MIR408b,aly-MIR408,mes-MIR408,vvi-MIR408,nta-MIR408,csi-MIR408,lus-MIR408a,cme-MIR408,cas-MIR408,cpa-MIR408,rco-MIR408,cca-MIR408,ahy-MIR408,vun-MIR408,dpr-MIR408,	mdm-MIR408a	ggaaagagagttaataagACAGGGAAGAGGTAGAGCATGgatggagttctcaagagcaaaatagagctcttgtgactctactcATGCACTGCCTCTTCCCTGGCtttgcctccctctccttcc	mdm-miR408a	ATGCACTGCCTCTTCCCTGGC	3'	Diff	gp3	((((.(((((.....(((.((((((((((((((.(((((..(((((((..(((((((........))))))).)))))))..))))).)))))))))))))).))).......))))).))))	123	48.8	-70.1	1.2	1110.67	1667	2009	2496.17	2505.25	2732.5	49	237.917	137.25	270.583	259.917	1092.42	62.75	38.4167	301.5	49.75	320.583	123.5	1641.92	19.0833	6.75	54.75	32.9167	19.75	1695.42	1860
53	68	mdm-miR408b_L-1R+1_1ss8AC	CAGGGACGAGGTAGAGCATGG	21						4	mdm-MIR408a,mdm-MIR408c,mdm-MIR408b,mdm-MIR408d,	mdm-MIR408b	ACAGGGAAGAGGTAGAGCATGgatggagttctcaagagcaaaatagagctcttgtgactctactcatgcactgcctcttccctgg	mdm-miR408b	ACAGGGAAGAGGTAGAGCATG	5'	Diff	gp3	((((.(((((.....(((.((((((((((((((.(((((..(((((((..(((((((........))))))).)))))))..))))).)))))))))))))).))).......))))).))))	85	48.8	-70.1	1.2	0	0	0	0	0	0	0	0	4	0	0	0	0	0	0	0	0	0	0	0	0	0	0	0	0	0
53	67	mdm-miR408a_L-1R+1	TGCACTGCCTCTTCCCTGGCT	21						4	mdm-MIR408a,mdm-MIR408c,mdm-MIR408b,mdm-MIR408d,	mdm-MIR408a	ggaaagagagttaataagACAGGGAAGAGGTAGAGCATGgatggagttctcaagagcaaaatagagctcttgtgactctactcATGCACTGCCTCTTCCCTGGCtttgcctccctctccttcc	mdm-miR408a	ATGCACTGCCTCTTCCCTGGC	3'	Diff	gp3	((((.(((((.....(((.((((((((((((((.(((((..(((((((..(((((((........))))))).)))))))..))))).)))))))))))))).))).......))))).))))	123	48.8	-70.1	1.2	1110.67	1667	2009	2496.17	2505.25	2732.5	49	237.917	137.25	270.583	259.917	1092.42	62.75	38.4167	301.5	49.75	320.583	123.5	1641.92	19.0833	6.75	54.75	32.9167	19.75	1695.42	1860
54	69	sly-miR408_1ss12CA	ACGGGGACGAGACAGAGCATG	21						2	sly-MIR408,stu-MIR408b,	sly-MIR408	gatagACGGGGACGAGCCAGAGCATGagatgtgcaatttttgctttgcctattccatgcactgcctcttccctggctctcct	sly-miR408	ACGGGGACGAGCCAGAGCATG	5'	Diff	gp3	((.((.((((((.(((.(((.(((((..((..((((........))))..))..))))).))).))).)))))).)).))..	82	52.4	-33.7	0.8	86	127	215	190	171	240	13	44	8	9	7	65	6	12	33	0	9	7	126	0	0	7	0	0	83	87
54	70	stu-miR408b-3p	TGCACTGCCTCTTCCCTGGCT	21						2	sly-MIR408,stu-MIR408b,	stu-MIR408b	ACGGGGACGAGACAGAGCATGagatgtgcaatttttacttgcctattccaTGCACTGCCTCTTCCCTGGCT	stu-miR408b-3p	TGCACTGCCTCTTCCCTGGCT	3'	Yes	gp3	((.((.((((((.(((.(((.(((((..((..((((........))))..))..))))).))).))).)))))).)).))..	71	52.4	-33.7	0.8	1110.67	1667	2009	2496.17	2505.25	2732.5	49	237.917	137.25	270.583	259.917	1092.42	62.75	38.4167	301.5	49.75	320.583	123.5	1641.92	19.0833	6.75	54.75	32.9167	19.75	1695.42	1860
55	71	mdm-miR477b_1ss20GC	ACTCTCCCTCAAGGGCTTCCAC	22						11	mdm-MIR477b,stu-MIR477a,mes-MIR477i,mes-MIR477h,mes-MIR477d,mes-MIR477k,nta-MIR477a,csi-MIR477c,aqc-MIR477a,aqc-MIR477e,aqc-MIR477b,	mdm-MIR477b	caaggcatttttgttgctcACTCTCCCTCAAGGGCTTCGACcaatgtcagacatgrcgagctcgaagacttggggagagtgaataaaaagtgtcttg	mdm-miR477b	ACTCTCCCTCAAGGGCTTCGAC	5'	Diff	gp3	((((((((((((.....((((((((((.((((..((((((....((.((....)).))...)))))).))))))))))))))...))))))))))))	97	47.4	-43.9	1	347	611	715	145	133	162	961	1023	1094	231	142	241	375	859	623	170	592	72	947	115	119	1068	748	535	532	645
56	72	mes-miR482b_1ss8TG	TTCCCAAGGTCGCCCATTCCGA	22						2	mes-MIR482b,stu-MIR408b,	mes-MIR482b	agatagagagctactggaagttgtaggaatgggcggtttgggaaaaaatcatatacataaatacgataacagattacgtcgaaaatcaaattaagtgtatacaagttttcTTCCCAATGTCGCCCATTCCGAtgatttccagaagctcctccctttc	mes-miR482b	TTCCCAATGTCGCCCATTCCGA	3'	Diff	gp3	((..((.(((((.((((((((..(.((((((((((..((((((((((((..(((((((......(((....(((...)))....))).......)))))))...))))).)))))))...)))))))))).)..)))))))).)))))))..))...	157	38.9	-59.8	1	0	0	0	0	0	0	5	0	0	0	0	0	11	0	5	0	0	0	9	0	0	14	0	0	0	0
57	73	gra-miR482d	TTTCCTATGCCCCCCATTCCAC	22						2	gra-MIR482d,stu-MIR408b,	gra-MIR482d	actggaaatttttggaagtggggtgcgaggaaagatcatttctcttctctcttatatatatacacacacacacacacacacacatacaaagagatcaaaccagatcTTTCCTATGCCCCCCATTCCACtgatttctag	gra-miR482d	TTTCCTATGCCCCCCATTCCAC	3'	Yes	gp3	.(((((((((..(((.(((((((.(((((((((((((........(((((.......................................)))))........)))))))))).))).))))))))))..)))))))))	138	40.6	-46.317	0.8	0	0	0	0	0	0	7	8	27	14	0	0	0	0	0	0	0	0	0	0	0	0	0	0	5	0
58	74	ppe-miR482a-3p	TTTCCGAAACCTCCCATTCCAA	22						2	ppe-MIR482a,stu-MIR408b,	ppe-MIR482a	aagaggaaatggaaatttttGGGTGAGAGGTTGCCGGAAAGAatacataatattcatccaagttttgatattaaattcTTTCCGAAACCTCCCATTCCAAtgatttccagctattccttt	ppe-miR482a-3p	TTTCCGAAACCTCCCATTCCAA	3'	Yes	gp3	.(((((((.(((((((..(((((((.((((((..((((((((((...((((((.((.........)))))))).)))))))))).)))))).))).))))..)))))))....)))))))	120	35	-45.8	1.1	0	0	11	9	0	0	0	0	0	0	0	0	0	0	6	0	0	0	8	0	0	0	0	5	0	0
59	75	mes-miR530a_R+1_1ss20TG	TGCATTTGCACCTGCACCTGA	21						21	mes-MIR530a,mtr-MIR530,gma-MIR530e,gma-MIR530b,gma-MIR530a,gma-MIR530d,gma-MIR530c,ptc-MIR530a,mdm-MIR530a,mdm-MIR530c,mdm-MIR530b,stu-MIR530,ppe-MIR530,mes-MIR530b,csi-MIR530a,csi-MIR530b,lus-MIR530b,lus-MIR530a,cme-MIR530a,cme-MIR530b,htu-MIR530,	mes-MIR530b	gccaaaatgttgcctttatcTGCATTTGCACCTGCACCTTacttttgtttctttaaaaatttcaacaatcaagatccttgtttttcctctcatttctagagtgtcagagaaactttttgatccaagaaaagagaggtgcaggtgtaagtgcaggtgaatgccattttggt	mes-miR530a	TGCATTTGCACCTGCACCTT	5'	Diff	gp3	(((..(((((((..((((((((((((..((..((................(((((((.(((.................................)))))))))).(((....))).))..))..))))))))))))..)))))))..)))	170	40.7	-56.198	0.9	2264.67	3569.75	4400.83	546.917	573.333	582.583	807.75	1250.42	446.083	859.25	1055.75	1545.75	585	223.75	855.917	249.833	1001.92	208.667	1437.25	619	141.333	4022.75	2642.25	2054.25	4770.42	5235.33
60	76	vvi-miR535a	TGACAACGAGAGAGAGCACGC	21						22	vvi-MIR535a,vvi-MIR535b,mdm-MIR535a,mdm-MIR535c,mdm-MIR535b,mdm-MIR535d,ppe-MIR535a,ppe-MIR535b,mes-MIR535a,mes-MIR535d,mes-MIR535c,mes-MIR535b,vvi-MIR535c,csi-MIR535c,csi-MIR535a,csi-MIR535b,csi-MIR535d,csi-MIR535e,csi-MIR535f,cpa-MIR535,rco-MIR535,aqc-MIR535,	vvi-MIR535c	tgtaattgctTGACAACGAGAGAGAGCACGCtagtctgcattcatgcgaggaacatgactgtgtacaggcgtgctctctgtcgctgtcatacaatcttctc	vvi-miR535a	TGACAACGAGAGAGAGCACGC	5'	Yes	gp3	....((((..(((((.(((((((((((((((..((..(((.(((((.......))))).)))..))..))))))))))))))).)))))..))))......	101	48.5	-51.1	1	37205	48702	61076	28005	29687	32493	5784	6733	1915	6610	3104	7484	10170	21670	11106	4673	6328	916	7131	2019	1588	36846	24291	17276	9233	10079
61	77	csi-miR536-3p_1ss21CT	TGGTGCCACGCTGTGTGCGTT	21						2	csi-MIR536,stu-MIR408b,	csi-MIR536	gtgaagttatgataagagtaaggattgaggCGCACCCCAGCGTGGAACCATCaaaagttgtgattacagttagagcaatgggtgaTGGTGCCACGCTGTGTGCGTCttgaatgcttattctttgcgctagacaagc	csi-miR536-3p	TGGTGCCACGCTGTGTGCGTC	3'	Diff	gp3	((..(((......(((((((((.((((((((((((..((((((((.(((((((...(((((.............)))))...))))))).)))))))).))))))))).))).)))))))))...)))..))....	136	47.1	-58.4	0.9	3297	4084.5	5131	2451	2686.5	2667.5	21	19.5	0	5.5	0	9	8	2.5	5	4.5	6	0	23.5	11.5	4	1798	900	769	828	849
62	78	mes-miR827	TTAGATGACCATCAACAAACA	21						7	mes-MIR827,mdm-MIR827,ppe-MIR827,csi-MIR827,ghr-MIR827b,ghr-MIR827a,ghr-MIR827c,	mes-MIR827	catggatatatttgttgatagtcatctactcaatttatttttaacccattaattattatgaTTAGATGACCATCAACAAACAcattcatg	mes-miR827	TTAGATGACCATCAACAAACA	3'	Yes	gp3	(((((((...(((((((((.((((((((.(((....((..((((....))))..))..))).)))))))).)))))))))...)))))))	90	26.7	-27.9	1.2	0	0	0	0	0	0	0	3	0	6	0	0	0	0	0	0	0	0	0	0	0	0	0	0	0	0
63	79	ath-miR858b	TTCGTTGTCTGTTCGACCTTG	21						7	ath-MIR858b,ath-MIR858a,aly-MIR858,ppe-MIR858,csi-MIR858,cme-MIR858,cas-MIR858,	ath-MIR858b	cctacccgaagggttttggagagtagacaaagagacaaacatagaggtgtgagtttggtttggttttgggttttggggggttggtagtgtttgaggtccatatgcctcgatcttccgcttctattaattaattttctctattagaaatattatctaattattccactccatcgaaccatgcacatatataatgatatgtataagcccatcaaagtttttgaattcagtgcaaacacttgtcaaaggagcagtcccgatctggttccatcttatcTTCGTTGTCTGTTCGACCTTGgctttggc	ath-miR858b	TTCGTTGTCTGTTCGACCTTG	3'	Yes	gp3	.....((((((......((.((..((((((.((((.........((((((.....(((((((((..((((.....((..((.((.((...(((((((......))))))).)).))))..)).................((((((.......))))))...))))....))))))))).((((.((((((......))))))......(((((...))))).....))))..))))))......(((((((.......)).)))))......))))..))))))..))..))....)))))).	303	40.3	-70.3	0.6	16388	22522	28813	15236	16351	17107	5323	15272	1740	10950	9968	17819	11804	11911	10908	5115	15769	3070	18672	4936	2998	20316	13181	9713	10368	10329
64	80	ppe-miR1511-3p	ACCTGGCTCTGATACCATAAC	21						2	ppe-MIR1511,stu-MIR408b,	ppe-MIR1511	atCGTGGTATCAGAGTCATGTTAtttgcatgttgccaccacatatgtgttgctcatataaataACCTGGCTCTGATACCATAAC	ppe-miR1511-3p	ACCTGGCTCTGATACCATAAC	3'	Yes	gp3	...(((((((((((((((.(((((((..(((..((...(((....)))..)).)))..))))))).)))))))))))))))...	84	39.3	-37.5	1.1	9	0	0	13	11	13	0	0	3.5	2.5	0	0	9	9.5	16.5	0	8	0	15.5	0	5.5	0	6	0	16	9.5
65	81	ptc-miR2111a	TAATCTGCATCCTGAGGTTTG	21						5	ptc-MIR2111b,ptc-MIR2111a,mdm-MIR2111b,mdm-MIR2111a,csi-MIR2111,	ptc-MIR2111a	cttgatattgggtcaggacttggTAATCTGCATCCTGAGGTTTGgatcatcatgtagtttgatctagtccttgggttgcagattacctcttcctcactgacaatgcagag	ptc-miR2111a	TAATCTGCATCCTGAGGTTTG	5'	Yes	gp3	(((((((((.((((..((((((((((((.((..(((..(((((((..........)))))))..)))..)).))))))))))))..)))).)))..))))))	110	44.1	-49.2	1.1	0	15	18	0	0	0	13	19	0	13	0	0	14	0	13	15	15	0	13	0	0	0	0	0	6	0
66	82	ghr-miR2949b_1ss1TA	ACTTTTGAACTGGATTTGCCGA	22						3	ghr-MIR2949b,ghr-MIR2949c,ghr-MIR2949a,	ghr-MIR2949b	catgatgctgctcagtattttaatactggtcttactgtcttagtttgcgtcttgTCTTTTGAACTGGATTTGCCGActtgaactgcgttgttgaaggtttacaaaacccgagccTGCAAATCCAGTCAAAAGTTAaaccgggctgagatttacgaatctgatatatattgggaggtattatg	ghr-miR2949b	TCTTTTGAACTGGATTTGCCGA	5'	Diff	gp3	((((((((..((((((((....(((..((.......((((((((..(.((.....((((((.(((((((((((.......(((......)))..((((((.........)))))))))))))))))))))))....)))..))))))))........))..)))))))))))..))))))))	182	40.1	-56.6	0.8	0	0	0	0	0	0	0	0	5	0	0	0	0	0	0	0	0	0	0	0	0	0	0	0	0	0
67	83	han-miR3630-3p_L-3_1ss21TA	GGGAATCTCTCTGATGCAT	19						2	han-MIR3630,stu-MIR408b,	han-MIR3630	tactaacaattaGCAAGTGATGATAGACCAGACAgggacatctgtattctttttgaacatgatgatttgtcTGTGGGAATCTCTCTGATGCTTagatttcta	han-miR3630-3p	TGTGGGAATCTCTCTGATGCTT	3'	Diff	gp3	..((((..(((((..((.(((.......(((((((...(((((((..((.....))))).))))..))))))).....))).)))))))..)))).......	102	36.3	-19.5	0.5	0	0	0	0	4	7	0	0	0	0	0	0	0	8	0	0	0	0	0	0	0	3.5	4.5	0	0	0
68	84	vvi-miR3630-3p_L-1_1ss14CT	TTGGGAATCTCTTTGATGCAC	21						2	vvi-MIR3630,stu-MIR408b,	vvi-MIR3630	cagtatggttgTGCAAGTGACGATATCAGACAgggacatcagcacctccaatggagaatgatgatttgtcTTTGGGAATCTCTCTGATGCACaagcatattg	vvi-miR3630-3p	TTTGGGAATCTCTCTGATGCAC	3'	Diff	gp3	(((((((.(((((((((.((.(((..(((((((...(((((....((((...))))..)))))..))))))...)..))))).))..))))))).)))))))	102	44.1	-34.7	0.8	10	6	16	42	30	46	40	41	365	18	5	13	25	243	22	8	53	0	43	5	0	66.5	94.5	32	10	16
69	85	vvi-miR3633a-3p_R-3_1ss7TA	TTCCTAAACCACCCATTCC	19						2	vvi-MIR3633a,stu-MIR408b,	vvi-MIR3633a	gaaatgggagatgaatatttcgaaagcaataGGAATGGATGGTTAGGAGAGaactcctcttatatatttcttcatcttctccgccggagatgtggaagtgcagttggTTCCTATACCACCCATTCCCTAcggttttcgaaattttctcccttttc	vvi-miR3633a-3p	TTCCTATACCACCCATTCCCTA	3'	Diff	gp3	((((.((((((.....(((((((((((..(((((((((.((((((((((..((((.........((((((..(((((((......)))))))..)))))).))))..)))))).)))).))))).))))..)))))))))))..)))))).))))	155	41.9	-64.3	1	116	160	145	164	141	140	115	84	122	76	31	81	78	145	71	34	107	23	119	39	20	165	129	89	114	62
70	86	mtr-miR4414a-5p	AGCTGCTGACTCGTTGGTTCA	21						4	mdm-MIR319c,mtr-MIR4414a,gma-MIR4414b,csi-MIR156j,	mtr-MIR4414a	ggctgagactcAGCTGCTGACTCGTTGGTTCAatagctcacaacatgcatagtgtcaacgtgtgtgcttctgATCCAACGATGCGGGAGCTGCattccagtcgt	mtr-miR4414a-5p	AGCTGCTGACTCGTTGGTTCA	5'	Yes	gp3	((((((((.((((((((((((..((.(((.((..((..((..((.(((((((.(((..(((((((.(((..(((.(((((..................))))).)))..))).)))))))..))).)))))))..))..))..)))).))).))..))))))))))))))))))))	104	50.6	-89.9	1	0	0	0	0	0	0	14.5	17.5	5	15	0	8	15	35	23.5	0	2.5	0	22	0	0	10	6	5	61.5	71.5
71	87	gma-miR4995_L+1R-4	TAGGCAGTGGCTTGGTTA	18						2	gma-MIR4995,stu-MIR408b,	gma-MIR4995	taaaactcatAGGCAGTGGCTTGGTTAAGGGaagccactggagccgtagtaaaagcaagtcttcaccgggcaattgtttatggacccgaa	gma-miR4995	AGGCAGTGGCTTGGTTAAGGG	5'	Diff	gp3	......(((((..((((.((..(((.((((...((.((((......))))....))...)))).)))..)).))))..))))).......	90	47.8	-23.2	0.5	17	18	5	825	793	940	0	0	16	57	12	56	51	0	0	5	5	26	23	8	24	5	0	0	138	142
72	88	gma-miR5037b_L-1R-1_1ss18TA	ACCCTCAAAGGCTTCCAA	18						2	gma-MIR5037b,stu-MIR408b,	gma-MIR5037b	cagtAACCCTCAAAGGCTTCCTAGactccatgttacggtcaaatcaattaatcgttgattaggaataattaagagtttcggaagtaactttgggggttaactg	gma-miR5037b	AACCCTCAAAGGCTTCCTAG	5'	Diff	gp3	(((((((((((((((((((((.((((((...((((...((.(((((((.....))))))).))..))))...)))))).))))))..)))))))))))).)))	103	38.8	-41.3	1	0	0	0	0	0	0	3.66667	5	11.3333	11.3333	3	2	4.33333	21.6667	0	13.3333	10.6667	12.6667	6.66667	4	2.66667	0	0	0	2.66667	0
73	89	cas-miR5139_L-1	AACCTGGCTCTGATACCA	18						3	cas-MIR5139,cpa-MIR8155,rgl-MIR5139,	cas-MIR5139	gcacAAACCTGGCTCTGATACCAcataatacgaactccctaggatgaaactctgatggaggctgatgacaggtaagtggcgacgtgaattgatggtgatgatgcacaggtggattgc	cas-miR5139	AAACCTGGCTCTGATACCA	5'	Diff	gp3	(((...(((((((((...(((((((...((((..((((...(((......)))...)))).(((....)))...........))))...)).)))))..)).)).)))))....)))	117	48.7	-30.2	0.5	0	0	0	0	0	0	0	0	3.5	2.5	0	0	0	9.5	3.5	0	14	0	2.5	0	5.5	0	0	0	0	2.5
74	90	gma-miR6300	GTCGTTGTAGTATAGTGG	18						2	gma-MIR6300,stu-MIR408b,	gma-MIR6300	aggtaaaaatacttaccactatattacaacaacttgtttgtgaaattcaatggtaattttaaataataaatgttttaatattaccgatagcatttgattatatttttgttttaaagttacatttgattatatcgctatcggctataatgtaagtcatattcatccaatatcatgcaacttttttgtatagatatattaatattactcgataatcatcaaGTCGTTGTAGTATAGTGGtaagtattcccgcc	gma-miR6300	GTCGTTGTAGTATAGTGG	3'	Yes	gp3	.(((...(((((((((((((((((((((((.(((((...((((...((...((((((.((((.......(((.....((((((((((((((((.((((((......(((.........)))..)))))).)).))))))))...))))))....))).........(((((((((((.....)))))).))))).)))).)))))).))...))))))))).)))))))))))))))))))))))...)))	251	25.9	-72	1.1	135	160	254	388	369	436	2595	5354	17120	3613	3205	5265	4843	11374	2225	1466	3960	1222	5479	2416	2733	2786	2040	1288	2441	2605
75	91	ptc-miR6478_R+3_1ss21GA	CCGACCTTAGCTCAGTTGGTAGAG	24						2	ptc-MIR6478,stu-MIR408b,	ptc-MIR6478	aCCGACCTTAGCTCAGTTGGTGgagcggagggctgtaggtcgctggttggattccggcaaggtcggatttcaattttgtaatttcttttctcaccgaccttagttcagaagttgcattgttttgtctgttgaggtggt	ptc-miR6478	CCGACCTTAGCTCAGTTGGTG	5'	Diff	gp3	(((.((((((((.(((.(..((.(((...(..(((.((((((.((((((((.((((((...)))))).)))))).................)).)))))))))..)....))).))..)..)))...)))))))))))	138	47.8	-44.3	0.7	38	48	71	22	13	26	128	550	1370	127	147	140	337	348	303	105	290	8	465	97	65	269	201	120	135	123
76	92	mdm-miR7122a_L+1_2ss5TA22CG	TTTAAACAGAGAAATCACGGTGG	23						3	mdm-MIR7122a,mdm-MIR7122b,ppe-MIR7122b,	mdm-MIR7122a	gggttcattccattcttTTATACAGAGAAATCACGGTCGagatcaaaactcagaagtctgtcagattctctctctccgtcgtctcaaccgtgtttttctgtataaagagatgtactggatcc	mdm-miR7122a	TTATACAGAGAAATCACGGTCG	5'	Diff	gp3	(((((((...(((..(((((((((((((((.((((((.(((((........(((((((.....)))).))).........))))).)))))))))))))))))))))..)))...)))))))	122	41.8	-45.3	0.9	0	0	0	0	0	0	12	22	0	0	0	5	8	0	25	0	5	0	11	0	0	71	15	26	0	0
77	93	stu-miR8016_1ss7GT	ATTTTTTAATGGAAGGCCCATGTG	24						2	stu-MIR8016,stu-MIR408b,	stu-MIR8016	catggtcttttctttcaaaaatatattatattaggagttgctatatATTTTTGAATGGAAGGCCCATGTG	stu-miR8016	ATTTTTGAATGGAAGGCCCATGTG	3'	Diff	gp3	(((((.((((((.(((((((((((((..((........))..))))))))))))).)))))).)))))..	70	30	-23.8	1.1	0	12	17	6	0	0	8	0	5	0	0	0	13	9	48	0	9	0	15	0	0	26	19	21	0	8
78	94	ath-miR8175_L-2	TCCCCGGCAACGGCGCCA	18						2	ath-MIR8175,stu-MIR408b,	ath-MIR8175	cttaaggcaatttgacctatatcaaatttggcaccgttgccggggatcgacccgggtcacccgcgtgacaggcgggaatacttaccacttagtacaacgacccaatatagtggtaagtattctcgcatgtcactcgggttcGATCCCCGGCAACGGCGCCAaatttgatatagctcaaatcgccttaag	ath-miR8175	GATCCCCGGCAACGGCGCCA	3'	Diff	gp3	((((((((.((((((.((((((((((((((((.(((((((((((((((((........(((((.((((((.((((((((((((((((((...................)))))))))))))))))).)))))).)))))))))))))))))))))).)))))))))))))))).)))))).))))))))	189	50.3	-127.6	1.3	54	61	85	86	111	79	156	263	456	103	70	105	197	195	335	73	102	24	290	103	160	175	91	58	301	240
1	1	PC-5p-559054_17	ACTATCACTGAATATCACCTTACC	24	TRINITY_DN34067_c2_g2	-	717	881	aattatgttttacctccttcaACTAACACTGAATATCACCTTACCtcccctcaactttaaaaccgtatatttagaaccctaatagttgaggagtctaaatgtacagttttaaaggtgaagggggctAAGGTGATATTCAGTGATAGTTGAaggggtaaagtgtgt	0						5'	New	gp4	...((..(((((((.((((((((((.(((((((((((((((((.(((((.(((.(((((((((.(((((((((((..(((........)))..))))))))))).))))))))).))).))))).))))))))))))))))).)))))))))))))))))..)).	161	37	-93.4	1.5	0	0	0	0	0	0	0	0	0	0	0	0	0	15	3	0	0	0	2.5	0	0	0	0	0	0	0
1	2	PC-3p-1030661_6	AAGGTGATATTCAGTGATGGTTGA	24	TRINITY_DN34067_c2_g2	-	717	881	aattatgttttacctccttcaACTAACACTGAATATCACCTTACCtcccctcaactttaaaaccgtatatttagaaccctaatagttgaggagtctaaatgtacagttttaaaggtgaagggggctAAGGTGATATTCAGTGATAGTTGAaggggtaaagtgtgt	0						3'	New	gp4	...((..(((((((.((((((((((.(((((((((((((((((.(((((.(((.(((((((((.(((((((((((..(((........)))..))))))))))).))))))))).))).))))).))))))))))))))))).)))))))))))))))))..)).	161	37	-93.4	1.5	0	0	0	0	0	0	0	0	0	0	0	0	0	0	0	0	0	0	0	0	0	0	6	0	0	0
2	1	PC-5p-559054_17	ACTATCACTGAATATCACCTTACC	24	TRINITY_DN34067_c2_g2	+	622	776	actttaccccttcaACTATCACTGAATATCACCTTAGCccccttcacctttaaaactgtacatttagactcctcaactattagggttctaaatatacggttttaaagttgaggggaggtaaggtgatattcagtgttagttgaaggaggtaaaac	0						5'	New	gp4	..((((((((((((((((.(((((((((((((((((.(((((((((.(((((((((((((.(((((((..(((........)))..))))))).))))))))))))).))))))).))))))))))))))))))).)))))))))).))))))..	151	38.1	-92.2	1.6	0	0	0	0	0	0	0	0	0	0	0	0	0	15	3	0	0	0	2.5	0	0	0	0	0	0	0
3	3	PC-5p-320396_39	TGAGGGATTTGAGAAGGGATT	21	TRINITY_DN38034_c1_g9	-	673	825	tgtttggtTGTGGGATTTGAGAAGGGATTtaaaaagggaaatgaaaaaagtagatgaaatgtgaataaaacatacttatatttcacatagtttcacacatcttatcctttttcctttccaAATCCCTTCTCAAATTCTCCAACCaaacacaga	0						5'	New	gp4	((((((((((..((((((((((((((((((..(((((((((..........(((((..(((((((................))))))).(.....).)))))......)))))))))..))))))))))))))))))..))))))))))....	149	32	-60	1.2	0	0	0	3.5	0	0	2.5	0	5	0	0	0	2.5	5.5	6.5	0	2.5	0	0	0	0	9	0	5	0	0
3	4	PC-3p-30509_767	AATCCCTTCTCAAATCCTCCAACC	24	TRINITY_DN38034_c1_g9	-	673	825	tgtttggtTGTGGGATTTGAGAAGGGATTtaaaaagggaaatgaaaaaagtagatgaaatgtgaataaaacatacttatatttcacatagtttcacacatcttatcctttttcctttccaAATCCCTTCTCAAATTCTCCAACCaaacacaga	0						3'	New	gp4	((((((((((..((((((((((((((((((..(((((((((..........(((((..(((((((................))))))).(.....).)))))......)))))))))..))))))))))))))))))..))))))))))....	149	32	-60	1.2	8	94.5	144.5	5	16	57	117	193.5	147	43	24.5	113	120.5	182.5	337.5	20	120	0	302	0	0	620.5	482.5	376	66	142.5
4	5	PC-5p-334370_37	AATGATCATGAAAGATTTGTGACC	24	TRINITY_DN27619_c2_g2	-	7	180	aagagaaatgttagggattatgaaaagctttttcatgaaAATGATTATGAAAGATTTGTGACCcttaaattatcttgattagtgtggtactttattctaagtgtaatctaaaagTCATAAATCTTTCATGATCATttttatgaaagacttttcatgatacctagtattgctgaa	0						5'	New	gp4	...((.(((..((((.(((((((((((.((((((((((((((((((((((((((((((((((..(((.((((((((((..((((...))))....)).))).))))).)))..))))))))))))))))))))))))))))))))))))))))))))).))))..))).))...	168	27	-69.8	1.5	0	0	0	0	0	0	0	0	0	0	0	0	0	0	11	0	0	0	6	0	0	14	13	8	0	0
4	6	PC-3p-24651_983	TCATAAATCTTTCATGATCAT	21	TRINITY_DN27619_c2_g2	-	7	180	aagagaaatgttagggattatgaaaagctttttcatgaaAATGATTATGAAAGATTTGTGACCcttaaattatcttgattagtgtggtactttattctaagtgtaatctaaaagTCATAAATCTTTCATGATCATttttatgaaagacttttcatgatacctagtattgctgaa	0						3'	New	gp4	...((.(((..((((.(((((((((((.((((((((((((((((((((((((((((((((((..(((.((((((((((..((((...))))....)).))).))))).)))..))))))))))))))))))))))))))))))))))))))))))))).))))..))).))...	168	27	-69.8	1.5	0	24	42	0	0	0	136	193.5	10	186	143	268.5	189	91	505	94	274	19	577.5	46	11	789	536.5	452.5	17	70
5	7	PC-5p-310518_41	TTTGGTTGGGAATTTGGGAAG	21	TRINITY_DN26156_c0_g1	+	553	673	gcagtgTTTGGTTGGGGATTTGGGAAGagatttgaaaagggaaagaaaaaatgtgcgtgaaattagataaaatatattcatattttacaatcgcTTCCCAAATCCCTCAACTAAACACacg	0						5'	New	gp4	...((((((((((((((((((((((((.(((((....)).................(((((((..((((.....))))...))))))).))).))))))))))))).)))))))))))...	115	35.5	-45	1	0	0	11	0	0	0	6	9	0	0	0	0	0	5	7	0	8	0	0	0	0	0	0	0	0	0
5	8	PC-3p-634590_13	TTCCCAAATCCCTCAACCAAACAC	24	TRINITY_DN26156_c0_g1	+	553	673	gcagtgTTTGGTTGGGGATTTGGGAAGagatttgaaaagggaaagaaaaaatgtgcgtgaaattagataaaatatattcatattttacaatcgcTTCCCAAATCCCTCAACTAAACACacg	0						3'	New	gp4	...((((((((((((((((((((((((.(((((....)).................(((((((..((((.....))))...))))))).))).))))))))))))).)))))))))))...	115	35.5	-45	1	0	0	0	0	0	0	0	0	0	0	0	0	0	0	0	0	0	0	0	0	0	11	0	12	0	0
6	9	PC-5p-674588_12	CTGTGTTTGGTTGGGGGATTT	21	TRINITY_DN34293_c0_g1	-	387	558	acattctcagatttttggtagagcataggtacctttacgCTGTGTTTGGTTGGGGGATTTgaaaagaaattttagcgaaatattcgcatttcacctacctttttcctttctttttccAAATCTCCCAACCAAACACAGCGTtaggaggaggttcataccaaacttagaaata	0						5'	New	gp4	...((((.((...(((((((((((.......(((..(((((((((((((((((((((((((((((((((.....(((((...)))))...................))))))))..))))))))))))))))))))))))).))).....)))).))))))))).))))...	166	37.8	-67.2	1	0	0	0	0	0	0	0	0	0	0	0	0	0	0	7	0	5	0	0	0	0	0	0	0	0	0
6	10	PC-3p-90001_209	AAATCTCCCAACCAAACACAGCAT	24	TRINITY_DN34293_c0_g1	-	387	558	acattctcagatttttggtagagcataggtacctttacgCTGTGTTTGGTTGGGGGATTTgaaaagaaattttagcgaaatattcgcatttcacctacctttttcctttctttttccAAATCTCCCAACCAAACACAGCGTtaggaggaggttcataccaaacttagaaata	0						3'	New	gp4	...((((.((...(((((((((((.......(((..(((((((((((((((((((((((((((((((((.....(((((...)))))...................))))))))..))))))))))))))))))))))))).))).....)))).))))))))).))))...	166	37.8	-67.2	1	0	4	9	0	0	0	25	25.5	2.5	0	0	37.5	18.5	32	117	0	15.5	0	53	0	6	195	117.5	86.5	0	19
7	11	PC-5p-173050_91	ACAGAATGAGACACAGATGTGAGA	24	TRINITY_DN42416_c0_g2	+	1225	1344	cagttaggagcacagaagattttcACAGAATGAGACACAGATGTGAGAcaaaggtgtagaatccatcttttgtttCACATCTATGTCCCATTTTGTgaaaatctcttgtgcacttagatt	0						5'	New	gp4	...(((((.(((((..((((((((((((((((.((((.((((((((((((((((((.......)))).)))))))))))))).)))).))))))))))))))))..))))).)))))...	114	37.5	-62	1.4	0	0	0	0	0	0	10	10	12	0	5	6	0	6	15	0	9	0	18	0	0	10	0	0	0	0
7	12	PC-3p-1123841_6	CACATCTGTGTCCCATTTTGT	21	TRINITY_DN42416_c0_g2	+	1225	1344	cagttaggagcacagaagattttcACAGAATGAGACACAGATGTGAGAcaaaggtgtagaatccatcttttgtttCACATCTATGTCCCATTTTGTgaaaatctcttgtgcacttagatt	0						3'	New	gp4	...(((((.(((((..((((((((((((((((.((((.((((((((((((((((((.......)))).)))))))))))))).)))).))))))))))))))))..))))).)))))...	114	37.5	-62	1.4	0	0	0	0	0	0	0	0	0	0	0	0	0	0	0	0	0	0	6	0	0	0	0	0	0	0
8	13	PC-5p-24863_974	GGGATTGGTGGCTTGAAAAGC	21	TRINITY_DN26072_c0_g5	+	37	205	ttgggaagtgatgagaaacgggggatgaatatttgccgaaaatctttgGGGATTGGTGGCTTGGAAAGCttcgttcttttctcttttgaatgaatttaatggcTTTCCAAGTCCACCCATTCCTAttgttttcggtcttctctctcctttctcttctttcgcttcttca	0						5'	New	gp4	...((((((((.((((((.((((((.(((.....(((((((((...(((((((.((((((((((((((((((((((...........)))))).......))))))))))).))))).)))))))..))))))))).))))))))).)))))).....))))))))...	163	41.4	-73	1	32	40	54	26	24	31	30	47	75	23	13	18	27	152	58	5	21	0	48	5	10	108	133	71	14	24
8	14	PC-3p-2177_9260	NTTCCAAGTCCACCCATTCCTA	22	TRINITY_DN26072_c0_g5	+	37	205	ttgggaagtgatgagaaacgggggatgaatatttgccgaaaatctttgGGGATTGGTGGCTTGGAAAGCttcgttcttttctcttttgaatgaatttaatggcTTTCCAAGTCCACCCATTCCTAttgttttcggtcttctctctcctttctcttctttcgcttcttca	0						3'	New	gp4	...((((((((.((((((.((((((.(((.....(((((((((...(((((((.((((((((((((((((((((((...........)))))).......))))))))))).))))).)))))))..))))))))).))))))))).)))))).....))))))))...	163	41.4	-73	1	89	297	754	316	123	153	1524	1157	331	803	536	670	569	362	1378	170	984	75	1753	145	77	2901	1004	1393	165	296
9	15	PC-5p-134341_127	TATTGTGTGGTTGAGATTTAC	21	TRINITY_DN33548_c1_g2	+	249	408	aaagatcttttagaatttttttttcttaaagttttttaaagtgtgTATTGTGTGGTTGAGATTTAAtgttaaaaaattgatgtgatttgtcattaaATCTCAATCACACAATGCACCACTctaaaaaaactttaaaaaaaaaaaactctaaagtatcctt	0						5'	New	gp4	...(((..((((((.(((((((((.((((((((((((..(((((((((((((((((((((((((((((.....(((((.....)))))..)))))))))))))))))))))))))).)))...)))))))))))).))))))))).))))))..)))...	154	23.1	-63.9	1.7	8.5	20	33	0	5	6	19	35	0	0	0	6	13	11	38.5	0	0	0	29	0	0	87	65.5	37	0	23.5
9	16	PC-3p-33289_692	ATCTCAACCACACAATGCACCACT	24	TRINITY_DN33548_c1_g2	+	249	408	aaagatcttttagaatttttttttcttaaagttttttaaagtgtgTATTGTGTGGTTGAGATTTAAtgttaaaaaattgatgtgatttgtcattaaATCTCAATCACACAATGCACCACTctaaaaaaactttaaaaaaaaaaaactctaaagtatcctt	0						3'	New	gp4	...(((..((((((.(((((((((.((((((((((((..(((((((((((((((((((((((((((((.....(((((.....)))))..)))))))))))))))))))))))))).)))...)))))))))))).))))))))).))))))..)))...	154	23.1	-63.9	1.7	38.5	68	89.5	39.5	43	51	143.5	104	20	51	43	128.5	76	113	166.5	36	139.5	10	245	45	11	362	241.5	180	45	71
10	17	PC-5p-28038_848	ATTGTGTGGTTGAGATTTAATGAC	24	TRINITY_DN33548_c1_g2	-	286	451	gtaaaggatactttagagttttttttttttaaagtttttttagagtggtgcATTGTGTGATTGAGATTTAATGACaaatcacatcaattttttaacATTAAATCTCAACCACACAATACAcactttaaaaaactttaagaaaaaaaaattctaaaagatctttggt	0						5'	New	gp4	...((((((..(((((((((((((((((((((((((((((.((((((.((.((((((((.(((((((((((((..(((............)))..))))))))))))).)))))))).)))))))))))))))))))))))))))))))))))))..))))))...	160	24.1	-66.7	1.7	9	50	45.5	8	3	14	93	77	0	13.5	13	64	21	35	90.5	6	43	0	89.5	6	0	166.5	101.5	74	19.5	36.5
10	18	PC-3p-238290_59	ATTAAATCTCAACCACACAATGCA	24	TRINITY_DN33548_c1_g2	-	286	451	gtaaaggatactttagagttttttttttttaaagtttttttagagtggtgcATTGTGTGATTGAGATTTAATGACaaatcacatcaattttttaacATTAAATCTCAACCACACAATACAcactttaaaaaactttaagaaaaaaaaattctaaaagatctttggt	0						3'	New	gp4	...((((((..(((((((((((((((((((((((((((((.((((((.((.((((((((.(((((((((((((..(((............)))..))))))))))))).)))))))).)))))))))))))))))))))))))))))))))))))..))))))...	160	24.1	-66.7	1.7	0	0	0	0	0	0	3	0	0	0	2.5	0	0	3	4	0	0	0	5.5	0	0	23	14	10	0	0
11	19	PC-5p-1219212_5	ATACTGTGTTTGGTTGGGGGA	21	TRINITY_DN36323_c0_g9	-	76	147	ctaATACTGTGTTTGGTTGGGGAAttagagagggatttccttcccAAATTCCCCAACCAAACACAGTGTaac	0						5'	New	gp4	...(((((((((((((((((((((((...(((((....)))))...)))))))))))))))))))))))...	66	43.1	-45.6	1.5	0	0	0	0	0	0	0	0	0	0	0	0	0	0	5	0	0	0	0	0	0	0	0	0	0	0
11	20	PC-3p-242493_58	AAATCCCCCAACCAAACACAGTGT	24	TRINITY_DN36323_c0_g9	-	76	147	ctaATACTGTGTTTGGTTGGGGAAttagagagggatttccttcccAAATTCCCCAACCAAACACAGTGTaac	0						3'	New	gp4	...(((((((((((((((((((((((...(((((....)))))...)))))))))))))))))))))))...	66	43.1	-45.6	1.5	0	0	12	0	0	0	0	7	21	0	0	3	0	0	16.5	0	0	0	19.5	0	0	117	46	40.5	0	9
12	21	PC-5p-156691_104	ATTTTGTGGTTCAAATGGCTC	21	TRINITY_DN30572_c3_g2	-	311	461	gaaaatgtttggtagctcaaaATTTTGTAGTTCAAATGGCTCaaatctgtcaaaacgacgtcgttttacactcaaaatctgtcaaaacgacgtcgttttaagtgATTTGAGCCATTTGAATCACAAAAttttgagctacctaacattgttg	0						5'	New	gp4	...((((((.((((((((((((((((((..(((((((((((((((((....(((((((((((((((((((.........))).))))))))))))))))....)))))))))))))))))..)))))))))))))))))).))))))....	144	34.4	-84.6	1.6	0	0	0	0	0	0	0	0	6	0	3	5	3	5	27.5	0	2.5	0	14.5	0	0	186	120	130.5	0	2.5
12	22	PC-3p-115339_154	ATTTGAGCCATTTGAGTCACAAAA	24	TRINITY_DN30572_c3_g2	-	311	461	gaaaatgtttggtagctcaaaATTTTGTAGTTCAAATGGCTCaaatctgtcaaaacgacgtcgttttacactcaaaatctgtcaaaacgacgtcgttttaagtgATTTGAGCCATTTGAATCACAAAAttttgagctacctaacattgttg	0						3'	New	gp4	...((((((.((((((((((((((((((..(((((((((((((((((....(((((((((((((((((((.........))).))))))))))))))))....)))))))))))))))))..)))))))))))))))))).))))))....	144	34.4	-84.6	1.6	0	9.5	17	0	0	0	19.5	27	0	0	5	33	20	11.5	54	0	10.5	0	75	0	0	327.5	182	146	12	11
13	23	PC-5p-159142_102	TCAACCACACAATACACCACT	21	TRINITY_DN43865_c1_g7	+	109	260	taaattTCAACCACACGATACACCACTttaagaaatcctcgagagcaaagttttttcagcattaaatttcaaccacataatacaccactttaagaaatcctcgagagcaaagttttttagAGTGGTGCATTGTGTGGTTGAGATttaataat	0						5'	New	gp4	(((((((((((((((((((.((((((((((((((((.((((((.((............)).....(((((.......................))))).))))))......)))))))))))))))).))))))))))))))))))).....	147	33.6	-53.8	1.1	0	2.5	0	3.5	0	2.5	6.5	0	0	2.5	0	6.5	5	0	5	2.5	7.5	0	7	0	0	8.5	0	0	2.5	0
13	24	PC-3p-130040_132	AGTGGTGCATTGTGTGGTTGAGAT	24	TRINITY_DN43865_c1_g7	+	109	260	taaattTCAACCACACGATACACCACTttaagaaatcctcgagagcaaagttttttcagcattaaatttcaaccacataatacaccactttaagaaatcctcgagagcaaagttttttagAGTGGTGCATTGTGTGGTTGAGATttaataat	0						3'	New	gp4	(((((((((((((((((((.((((((((((((((((.((((((.((............)).....(((((.......................))))).))))))......)))))))))))))))).))))))))))))))))))).....	147	33.6	-53.8	1.1	5	16	23.5	8	9	11	54	29	0	2.5	0	23	13	6	74	0	18	0	50.5	6	0	89.5	41	29	4.5	17
14	25	PC-5p-322224_39	CAGCGGTGTGTTAAGAATATG	21	TRINITY_DN37731_c0_g1	+	509	607	ttctagactCAGCGGTGTGTTAAGAATATGattgattgataattaaatattttctaattatcaactaaTTATTTTCTTAACACATCACTatgtctataa	0						5'	New	gp4	...(((((..((.(((((((((((((.((((((..((((((((((.........))))))))))..)))))).))))))))))))).))..)))))...	93	24.2	-38.6	1.6	0	0	0	0	0	0	0	6	0	0	0	0	0	6	6	0	13	0	8	0	0	0	0	0	0	0
14	26	PC-3p-845853_8	TTATTTTCTTGACACATCACT	21	TRINITY_DN37731_c0_g1	+	509	607	ttctagactCAGCGGTGTGTTAAGAATATGattgattgataattaaatattttctaattatcaactaaTTATTTTCTTAACACATCACTatgtctataa	0						3'	New	gp4	...(((((..((.(((((((((((((.((((((..((((((((((.........))))))))))..)))))).))))))))))))).))..)))))...	93	24.2	-38.6	1.6	0	0	0	0	0	0	0	0	8	0	0	0	0	0	0	0	0	0	0	0	0	0	0	0	0	0
15	27	PC-5p-33289_692	ATCTCAACCACACAATGCACCACT	24	TRINITY_DN43865_c1_g7	-	113	239	attgagtggttgagattattaaATCTCAACCACACAATGCACCACTctaaaaaactttgctctcgaggatttcttaAAGTGGTGTATTATGTGGTTGaaatttaatgctgaaaaaactttgctctcg	0						5'	New	gp4	...((((((((.....((((((((.(((((((((.(((((((((((.(((.((((((((....))))).))).))).))))))))))).))))))))).)))))))).......))))..))))...	121	34.6	-45.5	1	38.5	68	89.5	39.5	43	51	143.5	104	20	51	43	128.5	76	113	166.5	36	139.5	10	245	45	11	362	241.5	180	45	71
15	28	PC-3p-193232_79	AAGTGGTGTATTGTGTGGTTG	21	TRINITY_DN43865_c1_g7	-	113	239	attgagtggttgagattattaaATCTCAACCACACAATGCACCACTctaaaaaactttgctctcgaggatttcttaAAGTGGTGTATTATGTGGTTGaaatttaatgctgaaaaaactttgctctcg	0						3'	New	gp4	...((((((((.....((((((((.(((((((((.(((((((((((.(((.((((((((....))))).))).))).))))))))))).))))))))).)))))))).......))))..))))...	121	34.6	-45.5	1	0	5	7	0	0	0	12	11	0	0	7	6	0	0	9	0	0	0	0	7	0	5	0	5	0	5
16	29	PC-5p-115327_154	AAACAAATGACCAAATGTCTCACA	24	TRINITY_DN24873_c3_g4	-	93	215	agggataccaaattttctaccAAACAAATGATCAAATGTCTCACAtgtgtgtgggatccgcaattctgtgaacctcacgactatgtaagACATTTGGTCATTTATTTGGTAGAaaatttgaaa	0						5'	New	gp4	........((((((((((((((((.((((((((((((((((.(((((..((((((...((((....))))...))))))..))))).)))))))))))))))).))))))))))))))))...	112	35.8	-57.5	1.3	0	0	7	0	0	5	10	39	24	7	20	5	25	15.5	61	6	17	0	37	0	0	107.5	52	52	0	18
16	30	PC-3p-528113_18	ACATTTGGTCATTTGTTTGGTAGA	24	TRINITY_DN24873_c3_g4	-	93	215	agggataccaaattttctaccAAACAAATGATCAAATGTCTCACAtgtgtgtgggatccgcaattctgtgaacctcacgactatgtaagACATTTGGTCATTTATTTGGTAGAaaatttgaaa	0						3'	New	gp4	........((((((((((((((((.((((((((((((((((.(((((..((((((...((((....))))...))))))..))))).)))))))))))))))).))))))))))))))))...	112	35.8	-57.5	1.3	0	0	0	0	3.5	0	0	0	0	3	0	2.5	0	0	0	0	0	0	0	0	0	3.5	0	0	0	0
17	31	PC-5p-1402690_5	TCAAATGGTCAAAACGATGTCGTT	24	TRINITY_DN38983_c5_g4	+	1	151	ggggctcaaaatttatggtttaaaagtggtTCAAATGGTCAAAACGATATCGTTttgagcacaaaacaacattcaaatggtcaaAACGACGTCATTTTGGCCATTTGAgccatttttaagccacaaaattaggacccccaaacatttttct	0						5'	New	gp4	((((.((..(((((.(((((((((((((((((((((((((((((.((..(((((((((.((................)).)))))))))..)).)))))))))))))))))))))))))))))..)))))..)).))))............	139	36.4	-69.2	1.3	0	0	0	0	0	0	0	0	0	0	0	0	0	0	0	0	0	0	0	0	0	0	2.5	5	0	0
17	32	PC-3p-18140_1384	AACGACGTCGTTTTGGCCATTTGA	24	TRINITY_DN38983_c5_g4	+	1	151	ggggctcaaaatttatggtttaaaagtggtTCAAATGGTCAAAACGATATCGTTttgagcacaaaacaacattcaaatggtcaaAACGACGTCATTTTGGCCATTTGAgccatttttaagccacaaaattaggacccccaaacatttttct	0						3'	New	gp4	((((.((..(((((.(((((((((((((((((((((((((((((.((..(((((((((.((................)).)))))))))..)).)))))))))))))))))))))))))))))..)))))..)).))))............	139	36.4	-69.2	1.3	16.5	122	218	15	16	42	132.5	215.5	34	76	57	175.5	147.5	56.5	573.5	16	126.5	0	504	5	9	1671	1219.5	1102.5	14.5	82
18	33	PC-5p-317517_40	GGGATTTGGAAAGAGAAA	18	TRINITY_DN39109_c2_g2	+	1	139	GGGATTTGGAAAGAGAAAggaagaaggtgaaggaaatgtgaatggaaatataagccaaatttgttctccatttcacccgccttttccttttCCTTTCCCTTTCCAAATTCTTacccattccatgatcctaacacaacct	0						5'	New	gp4	(((((((((((((.((((((((((.((..((((....(((((((((...(((((.....)))))..)))).)))))...))))..)))))))))))).)))))))))))))............................	111	39.6	-47.9	0.9	0	0	0	0	5	4.5	0	0	4.5	0	0	0	0	0	0	0	0	0	2.5	0	0	0	3.5	0	0	0
18	34	PC-3p-132795_129	CCTTTCCCTTTCCAAATTCCT	21	TRINITY_DN39109_c2_g2	+	1	139	GGGATTTGGAAAGAGAAAggaagaaggtgaaggaaatgtgaatggaaatataagccaaatttgttctccatttcacccgccttttccttttCCTTTCCCTTTCCAAATTCTTacccattccatgatcctaacacaacct	0						3'	New	gp4	(((((((((((((.((((((((((.((..((((....(((((((((...(((((.....)))))..)))).)))))...))))..)))))))))))).)))))))))))))............................	111	39.6	-47.9	0.9	0	7	7	0	0	9	22	23.5	5	8	0	3.5	0	5	18	0	0	0	4	0	0	44	25.5	42	0	4
19	35	PC-3p-1055017_6	TGATAGGGGTTACTTGGGGA	20	TRINITY_DN45608_c2_g5	+	20	109	ttatttgcccatatatccaccccaagttttcatctattatctttgaTGATAGGGGTTACTTGGGGAcaaaatggatatatgggcaaagtg	0						3'	New	gp4	...((((((((((((((((((((((((..((.(((((((((...)))))))))))..))))))))......))))))))))))))))...	84	37.8	-47.4	1.4	0	0	0	0	0	0	0	5	6	0	0	0	0	0	0	0	0	0	0	0	0	0	0	0	0	0
20	36	PC-3p-346339_35	TAATGTTTTCAAAACTCGA	19	TRINITY_DN26303_c0_g3	+	937	1118	ccaaacccaagtagttttcaacttatttaccaaactcaggtacttcagtgaaaggatgtattggaaacactactttgggtttaaaacacaagaagactaaattcaacgagTAGTGTTTTCAAAACTCGAtttcactgtagtatttgggtttagtaaataagtttaaaaccaattgggtttta	0						3'	New	gp4	..((((((((...(((((.(((((((((((.(((((((..((((.((((((((.((.((.(((((((((((((((((..((((..............))))..))..))))))))))))))).))))..)))))))).))))..))))))).))))))))))).)))))...))))))))..	178	32.4	-76.8	1.3	8	10	12	0	0	0	0	0	0	0	0	0	0	0	0	0	0	0	0	0	0	5	0	0	0	0
21	37	PC-5p-542248_18	TTTGGATAGGAATTTGGAAAG	21	TRINITY_DN44992_c3_g1	+	480	680	ggacataattctcttacatgaggtgagacttgcacaattaggttgtgcttggatgatggaTTTGGATAGGAATTTGGAAATggaactagacataattctatatttcatttacattttacccactttatccttttcaaattcatacccaaattcataattcaaacagtcttagtggtatgcacttaatgtgagatggttgtg	0						5'	New	gp4	...((((((..((((((((.(((((.....(((.((...((..(((..((((((.((((((((((.((.(((((((((((.(((..((((......)))).........((.....)).........)))))))))))))).)).)))))))))).)))))))))..))...)))))..))))).))))))))..))))))	198	33.8	-57.9	0.9	0	0	0	0	0	0	0	6	0	0	0	0	0	5	0	0	0	0	7	0	0	0	0	0	0	0
22	38	PC-3p-656142_13	TCCGCCTGCACTTCCATGA	19	TRINITY_DN43820_c1_g1	+	145	233	tatcaaaagagtcgtggaagatgctgtgaggcaagagcgccgcatgggcgcttccttgcTCCGCCTGCACTTCCATGActgttttgttc	0						3'	New	gp4	...(((((.(((((((((((.(((.(((..(((((((((((.....))))))..)))))..)))..)))))))))))))).)))))...	83	53.9	-50.1	1	0	0	0	0	0	0	0	0	18	0	0	0	0	0	0	0	0	0	0	0	0	0	0	0	0	0
23	39	PC-5p-865400_8	GGGACCAAGAACTCAGACACA	21	TRINITY_DN40912_c3_g1	+	250	390	GGGACCAAGAACTCAGACACAgaaaaatatcctaaaaaacaatgtggtctacattcaactgttgtattgtggattcaatagttagaatgaatctgaaccacactatttttctgggtatttttttgtgtctgatttcttggt	0						5'	New	gp4	...((((((((.((((((((((((((((((((..(((((...(((((((..(((((((((((((.(((...))).)))))))).))))).....).))))))...)))))..)))))))))))))))))))).))))))))	138	34	-61.3	1.3	0	0	0	0	0	0	0	0	13	0	0	0	0	0	0	0	0	0	0	0	0	0	0	0	0	0
24	40	PC-3p-408527_27	CCTTGCACTTTTCTCTGCACA	21	TRINITY_DN24216_c0_g2	-	581	730	acatacaaacacagaaaatgtgcagagaaaagtgcacagaaaatgaaatttggggctcatattgattttagttgcggtccacatcacatcggatttgaatctcttcattttCCTTGCACTTTTCTCTGCACAaattctgtgtttgtaaca	0						3'	New	gp4	...(((((((((((((..((((((((((((((((((..(((((((((...(((((((...((((....))))...))))).)).......((((....)))).)))))))))..))))))))))))))))))..)))))))))))))...	144	36.7	-66.8	1.2	7	6	14	0	0	0	0	0	0	0	0	0	0	0	0	0	0	0	0	0	0	0	0	0	0	0
25	41	PC-5p-148677_112	TATGGGTGTCCGACATGTGTC	21	TRINITY_DN35255_c1_g7	+	39	109	TATGGGTGTCCGACATGTGTCggacacggacacgtggtggacacgcaatggacacgtgtcggacactctct	0						5'	New	gp4	...((((((((((((((((((...((((....))))(((....)))....))))))))))))))))))...	65	57.7	-41.3	1	0	6	5	0	0	0	7	16	0	6	0	8	8	0	8	0	5	0	14	0	0	7	0	9	0	7
26	42	PC-3p-549768_17	CTTCTCCACGTTCTTTCTCCG	21	TRINITY_DN38361_c0_g8	+	552	693	gccggcggagagagaagatgaaggaggagaagagatcagacgacagagaaaagggaggtaagatcggagagttgagatcggagagctgagatcggagatctgttggatctcttctcCTTCTCCACGTTCTTTCTCCGccgta	0						3'	New	gp4	..((((((((((((((..((.((((((((((((((((...(((((((.....((..(((..((((..........)))).....)))....)).....))))))))))))))))))))))).))..))))))))))))))..	138	52.1	-69.3	0.9	0	0	0	0	0	0	11	0	0	0	0	0	0	0	0	0	0	0	6	0	0	0	0	0	0	0
27	43	PC-3p-18516_1353	AGAGATTATTTTCGAGCCATTCGT	24	TRINITY_DN35556_c2_g1	+	1	130	gctcgaaatggcttaaaaataatcttttaccggtaaaagattattttcataggtaaaaaaataatctcttaccgataAGAGATTATTTTTGAGCCATTCGTgccacactttttcgagttacgaggaattt	0						3'	New	gp4	((.((.(((((((((((((((((((((((.((((((.((((((((((..........)))))))))).)))))).))))))))))))))))))))))))).)).....((..(((.....)))..))...	103	31.5	-52.9	1.3	88	370	561	125	96	233	286	404	92	118	60	213	215	236	880	21	154	0	664	0	0	1762	1437	1216	116	382
28	44	PC-3p-47_152707	GAATGTTGGGTCCTTTGAGGTCA	23	TRINITY_DN42329_c2_g1	+	27	123	ttgatcagagaagtttccaattgTCCTCAAAGGCTTCCAATATTCGATtcaatgtgGAATGTTGGGTCCTTTGAGGTCAattgaagacttactcttc	0						3'	New	gp4	......((((((((((.((((((.(((((((((..((((((((((.((.....)).)))))))))).))))))))).)))))).)))))).))))..	89	39.2	-46.3	1.2	646	1523	2081	162	148	255	55977	41264	6983	13930	10096	12530	18924	40585	36612	5380	23616	3426	52393	4974	4330	6338	4615	3365	1203	2159
29	45	PC-3p-66331_303	TCTCTTTCCCTTTCCAAATCC	21	TRINITY_DN26016_c0_g1	-	13	189	cggtacctttatactgtgtttggttagaaaatttgtgaaaggatttggaaatgacaagaaaaaagatgtgtgaaagtaagtgaaatgtagatatattttattcttatttcacttatcttgTCTCTTTCCCTTTCCAAATCTttttccaaatccccaactaaacagcgttaggtgttt	0						3'	New	gp4	...(((((....((..(((((((((.....(((((..((((((((((((((.((.((((...(((((..((((((...((((((((((....))))))))))....))))))..)))))...))))))..))))))))))))))..)))))....)))))))))..)).)))))...	171	31.6	-52.1	0.9	7	16	27	17	13	15.5	44	28	20.5	14	9	24.5	17	19	51	6	24.5	0	48	0	0	55	34	17	13	17
30	46	PC-3p-545895_17	TGTGGTGAGAGTGAGAGA	18	TRINITY_DN28622_c0_g1	+	510	567	gattctcttactcgaacaccaacgattgcaagccaatTGTGGTGAGAGTGAGAGAcaa	0						3'	New	gp4	...((((((((((...(((((.((((((.....))))))))))).))))))))))...	52	44.8	-25.5	1	0	0	0	0	0	0	0	0	25	0	0	0	0	0	0	0	0	0	0	0	0	0	0	0	0	0
31	47	PC-3p-99538_185	TTCCCTCCACAAATCCAAGAT	21	TRINITY_DN34160_c0_g2	+	1305	1452	ttggatcttggatttgtggagcaatttgtgtaggaaaaaagaaatgaggagggaaaagtgaatgaagtagaagctatttatgtatttaatttttatttttttttacatctctcttttcatTTCCCTTCACAAATCCAAGATtcaaaca	0						3'	New	gp4	(((((((((((((((((((((...(((........)))..(((((((..(((((...(((((.(((((((((..((..........))..)))))))))..)))))...)))))..))))))).)))))))))))))))))))))...	145	29.7	-51.7	1.2	0	10	10	0	5	0	38	17	6	6	0	13	5	7	18	0	17	0	14	10	0	0	7	0	7	0
32	48	PC-5p-92854_201	CTTGCACGGAGATAGAATACAAAA	24	TRINITY_DN26593_c2_g2	+	506	652	ctaCTTGCACGGAGATAGAATACAAAAttttttcacataatagagataagatgtggggttatggggttcacatgtgatctagacatgtggggctctccttttttgtctcacttctataaaagtttttgtgttttatttcagtgtaag	0						5'	New	gp4	...(((((((.(((((((((((((((((((((..........(((((((((...(((.....((((..(((((((.......)))))).)..))))))).)))))))))........))))).)))))))))))))))).)))))))	144	35.4	-48.5	0.9	0	6	6	0	0	0	5	9	5	0	0	0	6	23	19	0	7	0	17	0	0	36	25	26	0	5
33	49	PC-3p-100894_182	TGATTTTAGATTGAGTGTTT	20	TRINITY_DN28830_c3_g2	-	79	144	ctaaaaaacaaacaaactaaaatcacattcgtaagtgcttgaTGATTTTAGATTGAGTGTTTttgg	0						3'	New	gp4	...(((((((..(((.(((((((((((..((....))..)).))))))))).)))..)))))))..	61	28.8	-17.1	0.9	268	258	416	5	29	8	0	0	0	0	0	0	0	0	0	0	0	0	34	0	0	52	0	0	0	0
34	50	PC-3p-72191_274	TTCACACACCTTTTTCCTTTCCCT	24	TRINITY_DN31404_c0_g1	+	66	154	tgatttggaaagagaaatggaaaaaagtaggtgaaatgtgaatatttcacctaatTTCACACACTTTTTTCCTTTCCCTttctaaacct	0						3'	New	gp4	...(((((((((.((((.((((((((((..((((((((((((...)))))...)))))))..)))))))))))))).)))))))))...	83	31.5	-34.3	1.2	0	21.5	21.5	11	5.5	14	16.5	17.5	16.5	14.5	0	14.5	17.5	35.5	55.5	0	17.5	0	15	0	0	140	85	81	2.5	21.5
35	51	PC-3p-157094_104	ATAACCCACTTCCCAAAATAGGCC	24	TRINITY_DN25563_c4_g4	-	12	147	tttgggctattttggaaagatggttataattagctttttgatgaaaagctcagcttataagcagcttttttgtgagagaggaagtgagttataatctgggaagtagattATAACCAACTTCCCAAAATAGGCCttt	0						3'	New	gp4	...((.(((((((((.(((.((((((((((..((((..((((....(((((.(((....))).((((..((......))..)))))))))...))).)..))))..)))))))))).))).))))))))).))...	130	34.6	-48.1	1	0	12	5	0	0	6	0	25	0	6	0	15	10	14	57	0	6	0	74	0	0	103	72	63	0	0
36	52	PC-3p-523015_19	AACGGTGCAGATGGTTTTCATGAT	24	TRINITY_DN38848_c0_g1	+	348	452	aattttcatgaaaatcatcatgaaaatcatccgtactgttggattatgagacacatacctgatttAACGGTGCAGATGGTTTTCATGAAaattttcatgaaacaa	0						3'	New	gp4	...((((((((((((..((((((((((((((.((((((((..((((.............))))..)))))))).))))))))))))))..))))))))))))...	99	31.4	-45.3	1.4	0	0	0	0	0	0	0	0	0	0	0	5	0	0	0	0	0	0	0	0	0	15	0	12	0	0
37	53	PC-3p-626112_14	TTTCCTTTCCTTTTCTAAATCCCT	24	TRINITY_DN38201_c0_g1	-	1633	1793	gaactgtgtttggatcatggatctaagtagaaatttggaaaatgaaaggaaaaggagagggaaatgtcaatgaaacataagttaatttttttctccatttccctcgcgtTTTCCTTTCCTTTTCTAAATTCCTacctgaatctatgatccaaacacaggtt	0						3'	New	gp4	...(((((((((((((((((((..(.((((.(((((((((((.((((((((((...((((((((((.....((((.((......)).))))....))))))))))...)))))))))).))))))))))).)))).)..)))))))))))))))))))...	155	34.8	-75	1.3	0	0	0	0	0	0	0	0	0	0	0	0	0	0	0	0	0	0	0	0	0	8	6	0	0	0
38	54	PC-5p-174389_91	AGTCAACCCGCAACCGCCCGCAGT	24	TRINITY_DN39297_c1_g1	-	899	1001	tttggagaaaAGTCAAACCGCAACCGCCCGCAGTgcggtttgcggtttgtgcgggtagggtttgcgaatgtgcgggcggtttgcggtttgaattttttccttt	0						5'	New	gp4	...((((((((.((((((((((((((((((((..((.....)).......((..(.....)..)).....))))))))).))))))))))).))))))))...	97	52.4	-52.8	1	0	0	5.5	0	0	0	0	0	0	0	0	0	4	3	3.5	0	0	0	3	0	0	17.5	11	5	0	4
39	55	PC-3p-418202_26	GTTGTAACTTGCCTTGATATTTGG	24	TRINITY_DN34563_c0_g2	+	485	629	tagatttcgagtcaagttacaattatcatttcaaaaaagtgcaagggtgttaagtgtaattgatattataacacgactattctttgttagtttttgaaatgacattacacaaacaggctaGTTGTAACTTGCCTTGATATTTGGa	0						3'	New	gp4	(((((.(((((.(((((((((((((((((((((((((...(((((((......((((.((.......)).))))......)))))))...))))))))))))................))))))))))))).))))).)))))..	143	30.3	-44	1	0	0	0	0	0	0	0	5	0	0	0	6	0	0	0	0	0	0	0	0	0	8	7	0	0	0
40	56	PC-3p-41728_531	TCAAATCCCTTCTCAAATCCC	21	TRINITY_DN33371_c3_g3	+	48	202	ctgtgtttggttgacggatttgagaaaggaattggaaaagaaaatgaaaaaaaaagatgaaatataaataaaatatacttatatttcacctaatttcacacacctttttcctttctttttTCAAATCCTTTCTCAAATCCCctaactaaacagcg	0						3'	New	gp4	...((((((((((..(((((((((((((((.((((((((..(((.((((((...((.((((((((((.((.....)).)))))))))).)).............)))))).)))..)))))))).)))))))))))))))..))))))))))...	149	29	-51.2	1.1	0	0	0	0	0	0	61	83	55	14	9	41	26	100	84	8	47	0	126	6	8	92	36	68	0	15
41	57	PC-3p-958919_6	TGATCCAACAGTTGTAAGTGT	21	TRINITY_DN41070_c0_g2	-	1256	1382	ttattctcaaatctccatgtcccaaaacatttacaatcgttggattatgtgaagatctcaaggtacagaaatcttgagataTGATCCAACAGTTGTAAGTGTtttggaacagggaggcggaggagtt	0						3'	New	gp4	...(((((...(((((.(((.(((((((((((((((..((((((((((......((((((((((......))))))))))))))))))))..))))))))))))))).))).)))))..)))))...	121	38.6	-60	1.2	0	0	0	0	0	0	0	0	0	0	0	0	0	0	6	0	0	0	0	0	0	5	0	0	0	0
42	58	PC-3p-201901_74	TTTCCCTTTCCAAATTCCTCC	21	TRINITY_DN39255_c0_g2	-	1376	1532	cgctgtgtttgattgggagattcaagaagaaatttagaaaatgaaagagaaaatgtgtaaaactatgtgaaatgtaagtatacattatttacatttcacctaccttttcatTTTCCCTTTCCAAATTCCTTCtcaaattccctaaccaaatacaaca	0						3'	New	gp4	...((((((((.(((((..(((..(((((.(((((.((((..((((..(((((.(((.........((((((((((((((.....)))))))))))))).))).)))))..))))..)))).))))).)))))..)))..))))).))))))))...	151	30.6	-48.3	1	0	2.5	0	0	0	0	0	3	0	0	0	12.5	2.5	4.5	10.5	3	10.5	0	5.5	0	0	78	58.5	56.5	0	2.5
43	59	PC-3p-171375_93	AATAAGGGAGGAAAGAGAAAGA	22	TRINITY_DN29221_c0_g1	+	431	491	ccctcttttctcttttttccctttttttttaataagAATAAGGGAGGAAAGAGAAAGAata	0						3'	New	gp4	...((.(((((((((..((((((.(((((....))))).))))))..)))))))))))...	55	29.5	-24.7	1.4	295	274	379	159	170	155	0	0	8	0	0	0	0	0	0	0	0	0	0	0	0	45	22	12	0	0
44	60	PC-3p-96119_193	CATATAGCTATTGATATCCGA	21	TRINITY_DN36917_c2_g2	+	11	216	gtcaaccaaaaattatattcatcagatatcaataactatgtgatcgcattgcatattttttatgctatttctcaaaagaaaaacttattgtttatttttttatgataaatgtaatttgatCATATAGTTATTGATATCCGAttaatatgatttttggtagatatgaagtacttaacgaaccctacaaaataaacggttcggatcat	0						3'	New	gp4	(((.(((((((((((((((.(((.(((((((((((((((((((((((((((((((.....)))))....((..(((((((((((.....)))).)))))))..))..))))).....))))))))))))))))))))).))).))))))))))))))).))).............((((((.............))))))......	162	25.2	-68.3	1.3	0	5	5	0	0	0	48	68	0	28	46	75	87	16	110	5	71	0	195	6	0	38	7	7	0	0
45	61	PC-3p-459616_23	CGCTCGAGTTCCAGTTGGC	19	TRINITY_DN36420_c0_g1	-	88	176	atgctgagttgcaaacagtcaagttggagctggaggacatacgccgcaaggttgtgtCGCTCGAGTTCCAGTTGGCtggcgatcagaaa	0						3'	New	gp4	...((((.((((...(((((((.((((((((.(((((((((.(((....))))))))).))).)))))))))))))))))))))))...	83	52.8	-46.8	1	10	21	13	0	0	0	0	0	0	0	0	0	0	0	0	0	0	0	0	0	0	0	0	0	0	0
46	62	PC-3p-1409908_5	CCTGGGTACAGCCTCTTCTCT	21	TRINITY_DN33850_c0_g3	-	547	619	cttctcagggtcagaggctaaacctagagggtcaaagtatttacccCCTGGGTACAGCCTCTTCTCTgggtcg	0						3'	New	gp4	...(((((((..(((((((..((((((.((((.((....)).)))).))))))..))))))).)))))))...	67	53.4	-35.3	0.9	0	0	0	0	5	0	0	0	0	0	0	0	0	0	0	0	0	0	0	0	0	0	0	0	0	0
47	63	PC-3p-366649_32	TTTCCTTTCTCTTTTCAAATTCCT	24	TRINITY_DN37943_c1_g4	+	195	359	ctagttggagattggttgaggaatttggtaagggattaggaaatagaaagggaaaagggaaggtgaaatactaataaaatatacttatatttcacttaatctcacatattttTTTCCTTTCTTTTTTCAAATTCCTattcaaaacttccaatcaaacacagcgta	0						3'	New	gp4	...((((....(((((((.(((.(((((..(((((((.(((((.((((((((((((((((((((((((((.(((..........)))))))))))))..)))).......)))))))))))).))))).)))))))..)))))..))))))))))...))))...	159	30.3	-48.2	1	0	0	0	0	0	0	0	0	0	0	0	0	0	0	0	0	0	0	0	0	0	12	8	5	0	7
48	64	PC-3p-257104_53	ATGTTTGTGACTAGGGTGTGA	21	TRINITY_DN26296_c0_g1	+	431	516	atatttcacatcctattcacaaacattgtgggtccaacacatgcatgagtgggaccgccaATGTTTGTGACTGGGGTGTGAgaaat	0						3'	New	gp4	...((((((((((((.((((((((((((..(((((.((.((....)).)).)))))..)))))))))))).))))))))))))...	80	44.2	-45.8	1.2	0	0	5	0	0	0	6	14	0	0	0	0	0	8	5	0	5	0	0	5	0	5	0	0	0	0
49	65	PC-3p-316771_40	AGTAATGCTTGGATCATGAGAAA	23	TRINITY_DN29175_c1_g3	+	101	211	atatttatgaaacatttcatgatattttTTTCATGATCCCTAGTATTATTCTTtcttgtaagAGTAATGCTTGGATCATGGGAAAaatatcatgaagatgatcataaaaga	0						3'	New	gp4	...(((((((..(((((((((((((((((..((((((((..((((((((((((......)))))))))))).))))))))..))))))))))))).)))).)))))))...	105	26.1	-51.9	1.8	0	0	0	0	0	0	0	0	0	0	0	8	6	0	35	0	6	0	5	0	0	0	0	8	0	0
50	66	PC-3p-44318_495	TTTTCCTCCACAAATTCCTCC	21	TRINITY_DN41290_c0_g2	+	1220	1353	gcaaggacttgatgagggatttgctgagggaaaggaaataggagggaaaaagtggacaaaatagaagtcgactttttgttacatttctctttttcttttctTTTTCCTCCACAAATTCCTCCtcaaatcctaaa	0						3'	New	gp4	...((((.((((.((((((((((..(((((((((((((.(..(((((((((((.(((.........))).)))).........)))))))..)...)))))))))))))..)))))))))).)))).))))...	128	37.3	-52	1	9	23	22	14	12	23	47	42	20	18	15	39	49	18	55	7	43	0	49	7	0	21	9	6	11	12
51	67	PC-5p-388553_29	TTTGGAAAGGGAAAGAGAAAAGAT	24	TRINITY_DN26016_c0_g1	+	98	272	aacacctaacgctgtttagttggggatttggaaaaagaTTTGGAAAGGGAAAGAGACAAGATaagtgaaataagaataaaatatatctacatttcacttactttcacacatcttttttcttgtcatttccaaatcctttcacaaattttctaaccaaacacagtataaaggtacc	0						5'	New	gp4	...((((.((..(((((.((((..((((((..(((.((((((((((.(..((((((.(((((..((((((((((....((((........))))..)))).))))))..))))).))))))..).)))))))))).)))..))))))..).))).)))))..))....))))...	169	31.4	-48.7	0.9	0	0	0	0	0	0	0	0	0	0	0	0	0	0	0	0	0	0	5	0	0	15	15	5	0	0
52	68	PC-3p-27079_883	TCAAATCCTCCAACCAAACACAGC	24	TRINITY_DN34293_c0_g1	+	501	611	ctaacgctgtgtttggttgggagatttggaaaaagaaaggaaaaaggtaggtgaaatgcgaatatttcgctaaaatttctttTCAAATCCCCCAACCAAACACAGCgtaaa	0						3'	New	gp4	...((((((((((((((((((.(((((((((..(((((...........(((((((((....)))))))))....)))))))))))))).))))))))))))))))))...	105	37.8	-52	1.2	38	161.5	194.5	25	51	30	135	199	77	46	45	110	87.5	185	300.5	29.5	97	0	206.5	0	0	855	675.5	486	51.5	150
53	69	PC-5p-182503_85	AAATCCTTGTCCAAATCCATGATC	24	TRINITY_DN32955_c2_g1	+	1	162	cctccagttctctttccctttccAAACCCTTGTCCAAATCCATGATCcaaacagtttaagttcctgttaaaataagagataagagaattaagcccctctaaggttgtgtttggattatggatttaggcagggatttggaaatggatagggaaatgtgagata	0						5'	New	gp4	.(((((.((((((.(((.((((((((.(((((((.((((((((((((((((((.....(((((((................)).))))).((((.......)))).)))))))))))))))))).))))))).)))))))).))).)))))).)).)))...	158	38.9	-67.6	1.1	0	0	0	0	0	0	9	0	0	7	0	0	5	5	26	0	0	0	0	0	0	18	14	12	0	7
[truncated: 29 more columns]
